# Supplementary material
Source: publisher figshare collection journal article supplement (https://acs.figshare.com/ndownloader/files/4701397)
Supplement: Supplementary file 1 [file 4701397]

  
data_f60427a 
  
_audit_creation_method            SHELXL-97 
_chemical_name_systematic 
; 
 ? 
; 
_chemical_name_common             ? 
_chemical_melting_point           ? 
_chemical_formula_moiety          ? 
_chemical_formula_sum 
 'C33 H41 N3 O2 Yb2' 
_chemical_formula_weight          857.77 
  
loop_ 
 _atom_type_symbol 
 _atom_type_description 
 _atom_type_scat_dispersion_real 
 _atom_type_scat_dispersion_imag 
 _atom_type_scat_source 
 'C'  'C'   0.0033   0.0016 
 'International Tables Vol C Tables 4.2.6.8 and 6.1.1.4' 
 'H'  'H'   0.0000   0.0000 
 'International Tables Vol C Tables 4.2.6.8 and 6.1.1.4' 
 'N'  'N'   0.0061   0.0033 
 'International Tables Vol C Tables 4.2.6.8 and 6.1.1.4' 
 'O'  'O'   0.0106   0.0060 
 'International Tables Vol C Tables 4.2.6.8 and 6.1.1.4' 
 'Yb'  'Yb'  -0.3850   5.5486 
 'International Tables Vol C Tables 4.2.6.8 and 6.1.1.4' 
  
_symmetry_cell_setting            Monoclinic 
_symmetry_space_group_name_H-M    P2(1)/c 
  
loop_ 
 _symmetry_equiv_pos_as_xyz 
 'x, y, z' 
 '-x, y+1/2, -z+1/2' 
 '-x, -y, -z' 
 'x, -y-1/2, z-1/2' 
  
_cell_length_a                    15.286(5) 
_cell_length_b                    13.357(4) 
_cell_length_c                    15.847(5) 
_cell_angle_alpha                 90.00 
_cell_angle_beta                  100.134(4) 
_cell_angle_gamma                 90.00 
_cell_volume                      3185.2(16) 
_cell_formula_units_Z             4 
_cell_measurement_temperature     293(2) 
_cell_measurement_reflns_used     940 
_cell_measurement_theta_min       3.107 
_cell_measurement_theta_max       24.892 
  
_exptl_crystal_description        ? 
_exptl_crystal_colour             ? 
_exptl_crystal_size_max           0.20 
_exptl_crystal_size_mid           0.15 
_exptl_crystal_size_min           0.15 
_exptl_crystal_density_meas       ? 
_exptl_crystal_density_diffrn     1.789 
_exptl_crystal_density_method     'not measured' 
_exptl_crystal_F_000              1664 
_exptl_absorpt_coefficient_mu     5.868 
_exptl_absorpt_correction_type    none 
_exptl_absorpt_correction_T_min   0.3865 
_exptl_absorpt_correction_T_max   0.4731 
_exptl_absorpt_process_details    ? 
  
_exptl_special_details 
; 
 ? 
; 
  
_diffrn_ambient_temperature       293(2) 
_diffrn_radiation_wavelength      0.71073 
_diffrn_radiation_type            MoK\a 
_diffrn_radiation_source          'fine-focus sealed tube' 
_diffrn_radiation_monochromator   graphite 
_diffrn_measurement_device_type   'CCD area detector' 
_diffrn_measurement_method        'phi and omega scans' 
_diffrn_detector_area_resol_mean  ? 
_diffrn_standards_number          ? 
_diffrn_standards_interval_count  ? 
_diffrn_standards_interval_time   ? 
_diffrn_standards_decay_%         11.31 
_diffrn_reflns_number             13125 
_diffrn_reflns_av_R_equivalents   0.0710 
_diffrn_reflns_av_sigmaI/netI     0.0825 
_diffrn_reflns_limit_h_min        -13 
_diffrn_reflns_limit_h_max        18 
_diffrn_reflns_limit_k_min        -15 
_diffrn_reflns_limit_k_max        15 
_diffrn_reflns_limit_l_min        -18 
_diffrn_reflns_limit_l_max        18 
_diffrn_reflns_theta_min          1.35 
_diffrn_reflns_theta_max          25.01 
_reflns_number_total              5604 
_reflns_number_gt                 3905 
_reflns_threshold_expression      >2sigma(I) 
  
_computing_data_collection        'Bruker SMART' 
_computing_cell_refinement        'Bruker SMART' 
_computing_data_reduction         'Bruker SHELXTL' 
_computing_structure_solution     'SHELXS-97 (Sheldrick, 1990)' 
_computing_structure_refinement   'SHELXL-97 (Sheldrick, 1997)' 
_computing_molecular_graphics     'Bruker SHELXTL' 
_computing_publication_material   'Bruker SHELXTL' 
  
_refine_special_details 
; 
 Refinement of F^2^ against ALL reflections.  The weighted R-factor wR and 
 goodness of fit S are based on F^2^, conventional R-factors R are based 
 on F, with F set to zero for negative F^2^. The threshold expression of 
 F^2^ > 2sigma(F^2^) is used only for calculating R-factors(gt) etc. and is 
 not relevant to the choice of reflections for refinement.  R-factors based 
 on F^2^ are statistically about twice as large as those based on F, and R- 
 factors based on ALL data will be even larger. 
; 
  
_refine_ls_structure_factor_coef  Fsqd 
_refine_ls_matrix_type            full 
_refine_ls_weighting_scheme       calc 
_refine_ls_weighting_details 
 'calc w=1/[\s^2^(Fo^2^)+(0.0253P)^2^+0.0000P] where P=(Fo^2^+2Fc^2^)/3' 
_atom_sites_solution_primary      direct 
_atom_sites_solution_secondary    difmap 
_atom_sites_solution_hydrogens    geom 
_refine_ls_hydrogen_treatment     constr 
_refine_ls_extinction_method      none 
_refine_ls_extinction_coef        ? 
_refine_ls_number_reflns          5604 
_refine_ls_number_parameters      361 
_refine_ls_number_restraints      0 
_refine_ls_R_factor_all           0.0599 
_refine_ls_R_factor_gt            0.0374 
_refine_ls_wR_factor_ref          0.0797 
_refine_ls_wR_factor_gt           0.0732 
_refine_ls_goodness_of_fit_ref    0.889 
_refine_ls_restrained_S_all       0.889 
_refine_ls_shift/su_max           0.001 
_refine_ls_shift/su_mean          0.000 
  
loop_ 
 _atom_site_label 
 _atom_site_type_symbol 
 _atom_site_fract_x 
 _atom_site_fract_y 
 _atom_site_fract_z 
 _atom_site_U_iso_or_equiv 
 _atom_site_adp_type 
 _atom_site_occupancy 
 _atom_site_symmetry_multiplicity 
 _atom_site_calc_flag 
 _atom_site_refinement_flags 
 _atom_site_disorder_assembly 
 _atom_site_disorder_group 
Yb1 Yb 0.67461(2) -0.13837(2) 0.928070(18) 0.03834(10) Uani 1 1 d . . . 
Yb2 Yb 0.86726(2) 0.15461(2) 0.73226(2) 0.04810(12) Uani 1 1 d . . . 
N1 N 0.5338(4) -0.1066(4) 0.8560(4) 0.0494(16) Uani 1 1 d . . . 
H1 H 0.4837 -0.1352 0.8576 0.059 Uiso 1 1 calc R . . 
N2 N 0.7694(4) 0.0675(4) 0.7873(4) 0.0498(16) Uani 1 1 d . . . 
H2 H 0.7952 0.0271 0.8260 0.060 Uiso 1 1 calc R . . 
N3 N 0.6449(4) -0.0164(4) 0.8162(3) 0.0382(14) Uani 1 1 d . . . 
O1 O 0.5868(4) -0.2583(3) 0.9958(3) 0.0574(15) Uani 1 1 d . . . 
O2 O 0.8042(4) 0.2982(3) 0.7699(3) 0.0549(15) Uani 1 1 d . . . 
C1 C 0.7667(13) -0.0864(11) 1.0769(9) 0.116(7) Uani 1 1 d . . . 
H1A H 0.8077 -0.1331 1.1033 0.140 Uiso 1 1 calc R . . 
C2 C 0.6827(14) -0.0806(10) 1.0867(6) 0.103(5) Uani 1 1 d . . . 
H2A H 0.6544 -0.1225 1.1203 0.123 Uiso 1 1 calc R . . 
C3 C 0.6467(8) -0.0054(12) 1.0407(9) 0.093(4) Uani 1 1 d . . . 
H3 H 0.5878 0.0148 1.0364 0.111 Uiso 1 1 calc R . . 
C4 C 0.7054(15) 0.0378(7) 1.0011(7) 0.100(5) Uani 1 1 d . . . 
H4 H 0.6955 0.0934 0.9654 0.120 Uiso 1 1 calc R . . 
C5 C 0.7836(11) -0.0134(15) 1.0218(11) 0.123(6) Uani 1 1 d . . . 
H5 H 0.8367 -0.0012 1.0026 0.148 Uiso 1 1 calc R . . 
C6 C 0.7083(8) -0.2652(7) 0.8118(6) 0.081(3) Uani 1 1 d . . . 
H6 H 0.6613 -0.2746 0.7666 0.097 Uiso 1 1 calc R . . 
C7 C 0.7222(9) -0.3183(6) 0.8855(8) 0.089(3) Uani 1 1 d . . . 
H7 H 0.6876 -0.3712 0.8992 0.107 Uiso 1 1 calc R . . 
C8 C 0.7969(9) -0.2796(9) 0.9367(6) 0.095(4) Uani 1 1 d . . . 
H8 H 0.8212 -0.3012 0.9917 0.114 Uiso 1 1 calc R . . 
C9 C 0.8295(7) -0.2033(8) 0.8922(8) 0.087(3) Uani 1 1 d . . . 
H9 H 0.8795 -0.1645 0.9117 0.104 Uiso 1 1 calc R . . 
C10 C 0.7747(8) -0.1949(7) 0.8141(7) 0.075(3) Uani 1 1 d . . . 
H10 H 0.7811 -0.1501 0.7707 0.090 Uiso 1 1 calc R . . 
C11 C 0.9649(8) 0.1352(19) 0.8855(7) 0.101(4) Uani 1 1 d . . . 
H11 H 0.9360 0.1327 0.9324 0.121 Uiso 1 1 calc R . . 
C12 C 0.9831(10) 0.0572(15) 0.8410(16) 0.122(6) Uani 1 1 d . . . 
H12 H 0.9692 -0.0088 0.8519 0.146 Uiso 1 1 calc R . . 
C13 C 1.0255(14) 0.088(2) 0.7766(15) 0.180(13) Uani 1 1 d . . . 
H13 H 1.0448 0.0474 0.7356 0.217 Uiso 1 1 calc R . . 
C14 C 1.0335(11) 0.186(3) 0.7843(16) 0.173(13) Uani 1 1 d . . . 
H14 H 1.0608 0.2281 0.7498 0.208 Uiso 1 1 calc R . . 
C15 C 0.9936(14) 0.2168(13) 0.8538(16) 0.157(9) Uani 1 1 d . . . 
H15 H 0.9887 0.2819 0.8732 0.189 Uiso 1 1 calc R . . 
C16 C 0.8654(10) 0.0651(9) 0.5864(6) 0.092(4) Uani 1 1 d . . . 
H16 H 0.8847 -0.0011 0.5896 0.111 Uiso 1 1 calc R . . 
C17 C 0.7777(8) 0.0981(9) 0.5850(5) 0.085(3) Uani 1 1 d . . . 
H17 H 0.7279 0.0586 0.5867 0.102 Uiso 1 1 calc R . . 
C18 C 0.7808(8) 0.2016(8) 0.5806(5) 0.076(3) Uani 1 1 d . . . 
H18 H 0.7327 0.2447 0.5790 0.091 Uiso 1 1 calc R . . 
C19 C 0.8650(9) 0.2295(8) 0.5789(6) 0.081(3) Uani 1 1 d . . . 
H19 H 0.8844 0.2951 0.5758 0.098 Uiso 1 1 calc R . . 
C20 C 0.9171(8) 0.1476(11) 0.5824(6) 0.098(4) Uani 1 1 d . . . 
H20 H 0.9779 0.1474 0.5820 0.118 Uiso 1 1 calc R . . 
C21 C 0.5559(5) -0.0276(5) 0.8099(4) 0.0441(18) Uani 1 1 d . . . 
C22 C 0.4961(5) 0.0406(5) 0.7620(4) 0.052(2) Uani 1 1 d . . . 
H22 H 0.4348 0.0346 0.7577 0.062 Uiso 1 1 calc R . . 
C23 C 0.5343(6) 0.1168(6) 0.7223(5) 0.061(2) Uani 1 1 d . . . 
H23 H 0.4970 0.1631 0.6900 0.073 Uiso 1 1 calc R . . 
C24 C 0.6225(6) 0.1275(5) 0.7277(5) 0.059(2) Uani 1 1 d . . . 
H24 H 0.6455 0.1793 0.6989 0.071 Uiso 1 1 calc R . . 
C25 C 0.6794(5) 0.0590(5) 0.7776(4) 0.0457(19) Uani 1 1 d . . . 
C26 C 0.6202(10) -0.3383(8) 1.0533(8) 0.128(5) Uani 1 1 d . . . 
H26A H 0.6714 -0.3157 1.0940 0.153 Uiso 1 1 calc R . . 
H26B H 0.6382 -0.3944 1.0215 0.153 Uiso 1 1 calc R . . 
C27 C 0.5492(11) -0.3684(12) 1.0981(9) 0.167(7) Uani 1 1 d . . . 
H27A H 0.5409 -0.4403 1.0940 0.200 Uiso 1 1 calc R . . 
H27B H 0.5644 -0.3506 1.1582 0.200 Uiso 1 1 calc R . . 
C28 C 0.4718(11) -0.3204(12) 1.0614(10) 0.189(8) Uani 1 1 d . . . 
H28A H 0.4447 -0.2879 1.1051 0.227 Uiso 1 1 calc R . . 
H28B H 0.4298 -0.3680 1.0310 0.227 Uiso 1 1 calc R . . 
C29 C 0.4965(7) -0.2472(8) 1.0026(6) 0.084(3) Uani 1 1 d . . . 
H29A H 0.4596 -0.2556 0.9466 0.101 Uiso 1 1 calc R . . 
H29B H 0.4865 -0.1803 1.0230 0.101 Uiso 1 1 calc R . . 
C30 C 0.7691(8) 0.3081(6) 0.8491(5) 0.083(3) Uani 1 1 d . . . 
H30A H 0.8157 0.2972 0.8983 0.100 Uiso 1 1 calc R . . 
H30B H 0.7222 0.2596 0.8508 0.100 Uiso 1 1 calc R . . 
C31 C 0.7341(8) 0.4099(7) 0.8502(6) 0.094(4) Uani 1 1 d . . . 
H31A H 0.6712 0.4115 0.8266 0.113 Uiso 1 1 calc R . . 
H31B H 0.7431 0.4360 0.9082 0.113 Uiso 1 1 calc R . . 
C32 C 0.7843(8) 0.4672(7) 0.7975(7) 0.105(4) Uani 1 1 d . . . 
H32A H 0.8392 0.4919 0.8312 0.126 Uiso 1 1 calc R . . 
H32B H 0.7499 0.5236 0.7712 0.126 Uiso 1 1 calc R . . 
C33 C 0.8026(8) 0.3959(6) 0.7318(6) 0.090(3) Uani 1 1 d . . . 
H33A H 0.7565 0.3996 0.6813 0.108 Uiso 1 1 calc R . . 
H33B H 0.8594 0.4107 0.7152 0.108 Uiso 1 1 calc R . . 
  
loop_ 
 _atom_site_aniso_label 
 _atom_site_aniso_U_11 
 _atom_site_aniso_U_22 
 _atom_site_aniso_U_33 
 _atom_site_aniso_U_23 
 _atom_site_aniso_U_13 
 _atom_site_aniso_U_12 
Yb1 0.0389(2) 0.03669(15) 0.03844(18) -0.00270(14) 0.00412(14) 0.00387(15) 
Yb2 0.0385(2) 0.0603(2) 0.0454(2) 0.00730(16) 0.00693(16) 0.00168(17) 
N1 0.034(4) 0.047(3) 0.066(4) 0.001(3) 0.005(3) -0.008(3) 
N2 0.027(4) 0.055(3) 0.065(4) 0.016(3) 0.000(3) 0.003(3) 
N3 0.033(4) 0.042(3) 0.039(3) 0.005(3) 0.005(3) 0.003(3) 
O1 0.058(4) 0.052(3) 0.062(3) 0.018(3) 0.010(3) 0.004(3) 
O2 0.078(4) 0.052(3) 0.038(3) 0.007(2) 0.021(3) 0.006(3) 
C1 0.114(13) 0.122(11) 0.083(9) -0.056(8) -0.065(9) 0.060(11) 
C2 0.186(17) 0.080(8) 0.041(6) -0.013(6) 0.016(9) -0.038(10) 
C3 0.059(8) 0.120(10) 0.093(9) -0.067(8) -0.004(7) 0.019(8) 
C4 0.202(17) 0.039(5) 0.048(6) -0.012(4) -0.010(9) -0.009(8) 
C5 0.102(12) 0.170(14) 0.116(12) -0.111(10) 0.066(10) -0.090(11) 
C6 0.104(10) 0.066(6) 0.071(7) -0.024(5) 0.014(6) 0.010(6) 
C7 0.129(12) 0.041(5) 0.111(9) -0.001(6) 0.056(8) 0.016(6) 
C8 0.118(11) 0.098(8) 0.065(7) 0.002(6) 0.009(7) 0.063(8) 
C9 0.055(7) 0.086(7) 0.124(10) -0.041(7) 0.025(7) 0.014(6) 
C10 0.084(8) 0.068(6) 0.083(7) -0.006(5) 0.038(6) 0.030(6) 
C11 0.048(7) 0.180(14) 0.069(7) 0.015(10) -0.005(5) 0.015(11) 
C12 0.052(10) 0.119(11) 0.174(17) 0.061(13) -0.036(10) 0.008(9) 
C13 0.076(16) 0.33(3) 0.122(16) -0.06(2) -0.023(11) 0.12(2) 
C14 0.033(9) 0.34(4) 0.139(19) 0.13(2) -0.005(9) -0.032(16) 
C15 0.106(16) 0.115(11) 0.20(2) 0.007(14) -0.108(14) -0.023(11) 
C16 0.121(11) 0.089(7) 0.067(7) -0.017(6) 0.016(7) 0.040(8) 
C17 0.102(10) 0.099(8) 0.053(6) -0.020(6) 0.011(6) -0.030(7) 
C18 0.092(9) 0.101(8) 0.032(4) -0.002(5) 0.003(5) 0.021(7) 
C19 0.095(10) 0.089(7) 0.060(6) 0.007(5) 0.016(6) 0.002(8) 
C20 0.088(10) 0.158(12) 0.055(6) -0.003(8) 0.029(6) 0.017(10) 
C21 0.037(5) 0.047(4) 0.048(4) -0.003(4) 0.007(4) 0.000(4) 
C22 0.029(5) 0.067(5) 0.055(5) 0.007(4) -0.003(4) 0.001(4) 
C23 0.043(6) 0.066(5) 0.071(6) 0.023(4) 0.001(4) 0.010(5) 
C24 0.043(6) 0.058(4) 0.076(6) 0.028(4) 0.009(4) 0.008(4) 
C25 0.036(5) 0.051(4) 0.049(4) 0.006(4) 0.005(4) 0.003(4) 
C26 0.169(15) 0.098(7) 0.108(9) 0.060(7) 0.002(9) 0.022(9) 
C27 0.135(15) 0.220(16) 0.151(13) 0.119(12) 0.040(11) -0.030(12) 
C28 0.130(15) 0.255(17) 0.187(15) 0.164(14) 0.037(12) -0.009(14) 
C29 0.053(7) 0.119(8) 0.086(7) 0.027(6) 0.026(5) 0.004(6) 
C30 0.133(10) 0.066(5) 0.059(6) 0.005(5) 0.039(6) 0.007(6) 
C31 0.133(11) 0.087(7) 0.076(7) 0.023(6) 0.057(7) 0.031(7) 
C32 0.159(12) 0.061(6) 0.113(8) -0.013(6) 0.073(8) 0.001(7) 
C33 0.148(11) 0.055(5) 0.079(7) 0.015(5) 0.053(7) -0.013(6) 
  
_geom_special_details 
; 
 All esds (except the esd in the dihedral angle between two l.s. planes) 
 are estimated using the full covariance matrix.  The cell esds are taken 
 into account individually in the estimation of esds in distances, angles 
 and torsion angles; correlations between esds in cell parameters are only 
 used when they are defined by crystal symmetry.  An approximate (isotropic) 
 treatment of cell esds is used for estimating esds involving l.s. planes. 
; 
  
loop_ 
 _geom_bond_atom_site_label_1 
 _geom_bond_atom_site_label_2 
 _geom_bond_distance 
 _geom_bond_site_symmetry_2 
 _geom_bond_publ_flag 
Yb1 N1 2.291(6) . ? 
Yb1 N3 2.392(5) . ? 
Yb1 O1 2.454(5) . ? 
Yb1 C3 2.606(9) . ? 
Yb1 C2 2.612(9) . ? 
Yb1 C1 2.618(9) . ? 
Yb1 C6 2.620(8) . ? 
Yb1 C5 2.626(9) . ? 
Yb1 C4 2.629(8) . ? 
Yb1 C7 2.633(8) . ? 
Yb1 C8 2.643(9) . ? 
Yb1 C10 2.673(9) . ? 
Yb2 N2 2.194(6) . ? 
Yb2 O2 2.272(5) . ? 
Yb2 C13 2.558(15) . ? 
Yb2 C14 2.565(15) . ? 
Yb2 C12 2.593(10) . ? 
Yb2 C16 2.598(9) . ? 
Yb2 C17 2.601(8) . ? 
Yb2 C18 2.608(8) . ? 
Yb2 C15 2.612(11) . ? 
Yb2 C20 2.621(10) . ? 
Yb2 C19 2.623(9) . ? 
Yb2 C11 2.630(10) . ? 
N1 C21 1.360(8) . ? 
N1 H1 0.8600 . ? 
N2 C25 1.362(9) . ? 
N2 H2 0.8600 . ? 
N3 C25 1.334(8) . ? 
N3 C21 1.354(9) . ? 
O1 C29 1.413(10) . ? 
O1 C26 1.438(9) . ? 
O2 C33 1.436(8) . ? 
O2 C30 1.456(10) . ? 
C1 C2 1.322(17) . ? 
C1 C5 1.363(17) . ? 
C1 H1A 0.9300 . ? 
C2 C3 1.305(14) . ? 
C2 H2A 0.9300 . ? 
C3 C4 1.316(15) . ? 
C3 H3 0.9300 . ? 
C4 C5 1.366(17) . ? 
C4 H4 0.9300 . ? 
C5 H5 0.9300 . ? 
C6 C7 1.351(12) . ? 
C6 C10 1.378(13) . ? 
C6 H6 0.9300 . ? 
C7 C8 1.380(13) . ? 
C7 H7 0.9300 . ? 
C8 C9 1.382(13) . ? 
C8 H8 0.9300 . ? 
C9 C10 1.372(12) . ? 
C9 H9 0.9300 . ? 
C10 H10 0.9300 . ? 
C11 C15 1.308(18) . ? 
C11 C12 1.314(18) . ? 
C11 H11 0.9300 . ? 
C12 C13 1.36(2) . ? 
C12 H12 0.9300 . ? 
C13 C14 1.33(3) . ? 
C13 H13 0.9300 . ? 
C14 C15 1.41(2) . ? 
C14 H14 0.9300 . ? 
C15 H15 0.9300 . ? 
C16 C20 1.364(14) . ? 
C16 C17 1.409(14) . ? 
C16 H16 0.9300 . ? 
C17 C18 1.386(12) . ? 
C17 H17 0.9300 . ? 
C18 C19 1.345(13) . ? 
C18 H18 0.9300 . ? 
C19 C20 1.348(13) . ? 
C19 H19 0.9300 . ? 
C20 H20 0.9300 . ? 
C21 C22 1.414(9) . ? 
C22 C23 1.379(10) . ? 
C22 H22 0.9300 . ? 
C23 C24 1.344(11) . ? 
C23 H23 0.9300 . ? 
C24 C25 1.407(9) . ? 
C24 H24 0.9300 . ? 
C26 C27 1.455(18) . ? 
C26 H26A 0.9700 . ? 
C26 H26B 0.9700 . ? 
C27 C28 1.380(17) . ? 
C27 H27A 0.9700 . ? 
C27 H27B 0.9700 . ? 
C28 C29 1.445(13) . ? 
C28 H28A 0.9700 . ? 
C28 H28B 0.9700 . ? 
C29 H29A 0.9700 . ? 
C29 H29B 0.9700 . ? 
C30 C31 1.461(11) . ? 
C30 H30A 0.9700 . ? 
C30 H30B 0.9700 . ? 
C31 C32 1.449(12) . ? 
C31 H31A 0.9700 . ? 
C31 H31B 0.9700 . ? 
C32 C33 1.473(11) . ? 
C32 H32A 0.9700 . ? 
C32 H32B 0.9700 . ? 
C33 H33A 0.9700 . ? 
C33 H33B 0.9700 . ? 
  
loop_ 
 _geom_angle_atom_site_label_1 
 _geom_angle_atom_site_label_2 
 _geom_angle_atom_site_label_3 
 _geom_angle 
 _geom_angle_site_symmetry_1 
 _geom_angle_site_symmetry_3 
 _geom_angle_publ_flag 
N1 Yb1 N3 57.7(2) . . ? 
N1 Yb1 O1 78.52(19) . . ? 
N3 Yb1 O1 136.18(19) . . ? 
N1 Yb1 C3 87.8(3) . . ? 
N3 Yb1 C3 90.6(5) . . ? 
O1 Yb1 C3 88.7(5) . . ? 
N1 Yb1 C2 107.8(5) . . ? 
N3 Yb1 C2 118.9(4) . . ? 
O1 Yb1 C2 73.1(3) . . ? 
C3 Yb1 C2 29.0(3) . . ? 
N1 Yb1 C1 135.1(4) . . ? 
N3 Yb1 C1 119.3(4) . . ? 
O1 Yb1 C1 91.6(6) . . ? 
C3 Yb1 C1 47.9(3) . . ? 
C2 Yb1 C1 29.3(4) . . ? 
N1 Yb1 C6 93.0(3) . . ? 
N3 Yb1 C6 87.4(3) . . ? 
O1 Yb1 C6 94.3(3) . . ? 
C3 Yb1 C6 176.9(5) . . ? 
C2 Yb1 C6 152.4(5) . . ? 
C1 Yb1 C6 131.6(4) . . ? 
N1 Yb1 C5 127.7(5) . . ? 
N3 Yb1 C5 90.3(6) . . ? 
O1 Yb1 C5 120.6(4) . . ? 
C3 Yb1 C5 49.0(4) . . ? 
C2 Yb1 C5 49.4(4) . . ? 
C1 Yb1 C5 30.1(4) . . ? 
C6 Yb1 C5 128.7(4) . . ? 
N1 Yb1 C4 97.7(4) . . ? 
N3 Yb1 C4 73.3(2) . . ? 
O1 Yb1 C4 117.5(4) . . ? 
C3 Yb1 C4 29.1(3) . . ? 
C2 Yb1 C4 48.5(3) . . ? 
C1 Yb1 C4 48.7(4) . . ? 
C6 Yb1 C4 147.8(5) . . ? 
C5 Yb1 C4 30.1(4) . . ? 
N1 Yb1 C7 108.6(3) . . ? 
N3 Yb1 C7 117.2(3) . . ? 
O1 Yb1 C7 73.3(3) . . ? 
C3 Yb1 C7 152.1(5) . . ? 
C2 Yb1 C7 123.2(5) . . ? 
C1 Yb1 C7 110.1(4) . . ? 
C6 Yb1 C7 29.8(3) . . ? 
C5 Yb1 C7 123.3(6) . . ? 
C4 Yb1 C7 153.4(5) . . ? 
N1 Yb1 C8 138.8(3) . . ? 
N3 Yb1 C8 124.4(3) . . ? 
O1 Yb1 C8 87.0(4) . . ? 
C3 Yb1 C8 130.6(4) . . ? 
C2 Yb1 C8 104.3(5) . . ? 
C1 Yb1 C8 83.1(4) . . ? 
C6 Yb1 C8 49.5(3) . . ? 
C5 Yb1 C8 93.0(6) . . ? 
C4 Yb1 C8 123.1(5) . . ? 
C7 Yb1 C8 30.3(3) . . ? 
N1 Yb1 C10 108.3(3) . . ? 
N3 Yb1 C10 75.4(2) . . ? 
O1 Yb1 C10 122.2(3) . . ? 
C3 Yb1 C10 146.9(5) . . ? 
C2 Yb1 C10 142.9(5) . . ? 
C1 Yb1 C10 113.7(5) . . ? 
C6 Yb1 C10 30.2(3) . . ? 
C5 Yb1 C10 100.4(4) . . ? 
C4 Yb1 C10 118.1(5) . . ? 
C7 Yb1 C10 49.6(3) . . ? 
C8 Yb1 C10 49.4(3) . . ? 
N2 Yb2 O2 89.6(2) . . ? 
N2 Yb2 C13 112.5(9) . . ? 
O2 Yb2 C13 130.3(6) . . ? 
N2 Yb2 C14 131.8(5) . . ? 
O2 Yb2 C14 102.6(9) . . ? 
C13 Yb2 C14 30.0(6) . . ? 
N2 Yb2 C12 84.5(4) . . ? 
O2 Yb2 C12 121.4(7) . . ? 
C13 Yb2 C12 30.7(5) . . ? 
C14 Yb2 C12 49.2(6) . . ? 
N2 Yb2 C16 102.0(4) . . ? 
O2 Yb2 C16 133.1(3) . . ? 
C13 Yb2 C16 86.9(5) . . ? 
C14 Yb2 C16 102.5(8) . . ? 
C12 Yb2 C16 105.0(7) . . ? 
N2 Yb2 C17 85.1(3) . . ? 
O2 Yb2 C17 107.4(3) . . ? 
C13 Yb2 C17 117.9(5) . . ? 
C14 Yb2 C17 132.2(7) . . ? 
C12 Yb2 C17 129.9(7) . . ? 
C16 Yb2 C17 31.4(3) . . ? 
N2 Yb2 C18 102.9(3) . . ? 
O2 Yb2 C18 82.5(2) . . ? 
C13 Yb2 C18 129.7(7) . . ? 
C14 Yb2 C18 124.7(5) . . ? 
C12 Yb2 C18 155.4(7) . . ? 
C16 Yb2 C18 50.7(3) . . ? 
C17 Yb2 C18 30.9(3) . . ? 
N2 Yb2 C15 110.1(7) . . ? 
O2 Yb2 C15 80.3(4) . . ? 
C13 Yb2 C15 50.8(7) . . ? 
C14 Yb2 C15 31.6(5) . . ? 
C12 Yb2 C15 48.7(5) . . ? 
C16 Yb2 C15 133.9(7) . . ? 
C17 Yb2 C15 163.4(8) . . ? 
C18 Yb2 C15 142.4(7) . . ? 
N2 Yb2 C20 132.0(3) . . ? 
O2 Yb2 C20 118.2(3) . . ? 
C13 Yb2 C20 79.9(7) . . ? 
C14 Yb2 C20 82.4(7) . . ? 
C12 Yb2 C20 108.1(7) . . ? 
C16 Yb2 C20 30.3(3) . . ? 
C17 Yb2 C20 50.8(4) . . ? 
C18 Yb2 C20 49.8(3) . . ? 
C15 Yb2 C20 112.6(8) . . ? 
N2 Yb2 C19 132.2(3) . . ? 
O2 Yb2 C19 89.1(3) . . ? 
C13 Yb2 C19 104.2(8) . . ? 
C14 Yb2 C19 94.9(5) . . ? 
C12 Yb2 C19 134.7(7) . . ? 
C16 Yb2 C19 49.8(3) . . ? 
C17 Yb2 C19 50.2(3) . . ? 
C18 Yb2 C19 29.8(3) . . ? 
C15 Yb2 C19 116.7(8) . . ? 
C20 Yb2 C19 29.8(3) . . ? 
N2 Yb2 C11 84.1(4) . . ? 
O2 Yb2 C11 92.2(5) . . ? 
C13 Yb2 C11 49.9(5) . . ? 
C14 Yb2 C11 49.5(5) . . ? 
C12 Yb2 C11 29.1(4) . . ? 
C16 Yb2 C11 133.8(5) . . ? 
C17 Yb2 C11 157.4(6) . . ? 
C18 Yb2 C11 171.1(6) . . ? 
C15 Yb2 C11 28.9(4) . . ? 
C20 Yb2 C11 128.7(4) . . ? 
C19 Yb2 C11 143.7(5) . . ? 
C21 N1 Yb1 96.4(4) . . ? 
C21 N1 H1 131.8 . . ? 
Yb1 N1 H1 131.8 . . ? 
C25 N2 Yb2 138.2(5) . . ? 
C25 N2 H2 110.9 . . ? 
Yb2 N2 H2 110.9 . . ? 
C25 N3 C21 121.5(6) . . ? 
C25 N3 Yb1 144.6(5) . . ? 
C21 N3 Yb1 92.1(4) . . ? 
C29 O1 C26 105.8(8) . . ? 
C29 O1 Yb1 125.6(5) . . ? 
C26 O1 Yb1 127.0(7) . . ? 
C33 O2 C30 107.3(6) . . ? 
C33 O2 Yb2 129.3(5) . . ? 
C30 O2 Yb2 122.8(4) . . ? 
C2 C1 C5 109.3(12) . . ? 
C2 C1 Yb1 75.1(6) . . ? 
C5 C1 Yb1 75.3(6) . . ? 
C2 C1 H1A 125.3 . . ? 
C5 C1 H1A 125.3 . . ? 
Yb1 C1 H1A 116.2 . . ? 
C3 C2 C1 107.6(14) . . ? 
C3 C2 Yb1 75.3(6) . . ? 
C1 C2 Yb1 75.6(7) . . ? 
C3 C2 H2A 126.2 . . ? 
C1 C2 H2A 126.2 . . ? 
Yb1 C2 H2A 115.2 . . ? 
C2 C3 C4 110.4(13) . . ? 
C2 C3 Yb1 75.8(6) . . ? 
C4 C3 Yb1 76.4(6) . . ? 
C2 C3 H3 124.8 . . ? 
C4 C3 H3 124.8 . . ? 
Yb1 C3 H3 114.9 . . ? 
C3 C4 C5 107.9(11) . . ? 
C3 C4 Yb1 74.5(6) . . ? 
C5 C4 Yb1 74.8(6) . . ? 
C3 C4 H4 126.1 . . ? 
C5 C4 H4 126.1 . . ? 
Yb1 C4 H4 116.7 . . ? 
C1 C5 C4 104.8(12) . . ? 
C1 C5 Yb1 74.6(6) . . ? 
C4 C5 Yb1 75.0(6) . . ? 
C1 C5 H5 127.6 . . ? 
C4 C5 H5 127.6 . . ? 
Yb1 C5 H5 115.4 . . ? 
C7 C6 C10 109.4(10) . . ? 
C7 C6 Yb1 75.6(5) . . ? 
C10 C6 Yb1 77.1(5) . . ? 
C7 C6 H6 125.3 . . ? 
C10 C6 H6 125.3 . . ? 
Yb1 C6 H6 114.1 . . ? 
C6 C7 C8 107.4(10) . . ? 
C6 C7 Yb1 74.6(5) . . ? 
C8 C7 Yb1 75.2(5) . . ? 
C6 C7 H7 126.3 . . ? 
C8 C7 H7 126.3 . . ? 
Yb1 C7 H7 116.1 . . ? 
C7 C8 C9 108.2(9) . . ? 
C7 C8 Yb1 74.4(6) . . ? 
C9 C8 Yb1 76.2(5) . . ? 
C7 C8 H8 125.9 . . ? 
C9 C8 H8 125.9 . . ? 
Yb1 C8 H8 115.6 . . ? 
C10 C9 C8 107.6(10) . . ? 
C10 C9 Yb1 75.1(6) . . ? 
C8 C9 Yb1 73.7(6) . . ? 
C10 C9 H9 126.2 . . ? 
C8 C9 H9 126.2 . . ? 
Yb1 C9 H9 117.1 . . ? 
C9 C10 C6 107.4(10) . . ? 
C9 C10 Yb1 75.2(6) . . ? 
C6 C10 Yb1 72.8(5) . . ? 
C9 C10 H10 126.3 . . ? 
C6 C10 H10 126.3 . . ? 
Yb1 C10 H10 117.8 . . ? 
C15 C11 C12 109.7(15) . . ? 
C15 C11 Yb2 74.8(7) . . ? 
C12 C11 Yb2 73.9(7) . . ? 
C15 C11 H11 125.1 . . ? 
C12 C11 H11 125.1 . . ? 
Yb2 C11 H11 118.0 . . ? 
C11 C12 C13 109.8(18) . . ? 
C11 C12 Yb2 77.0(7) . . ? 
C13 C12 Yb2 73.2(8) . . ? 
C11 C12 H12 125.1 . . ? 
C13 C12 H12 125.1 . . ? 
Yb2 C12 H12 116.5 . . ? 
C14 C13 C12 106(2) . . ? 
C14 C13 Yb2 75.3(11) . . ? 
C12 C13 Yb2 76.1(9) . . ? 
C14 C13 H13 127.0 . . ? 
C12 C13 H13 127.0 . . ? 
Yb2 C13 H13 114.3 . . ? 
C13 C14 C15 108(2) . . ? 
C13 C14 Yb2 74.7(11) . . ? 
C15 C14 Yb2 76.0(8) . . ? 
C13 C14 H14 125.9 . . ? 
C15 C14 H14 125.9 . . ? 
Yb2 C14 H14 115.6 . . ? 
C11 C15 C14 106.2(18) . . ? 
C11 C15 Yb2 76.3(7) . . ? 
C14 C15 Yb2 72.4(8) . . ? 
C11 C15 H15 126.9 . . ? 
C14 C15 H15 126.9 . . ? 
Yb2 C15 H15 116.7 . . ? 
C20 C16 C17 107.7(10) . . ? 
C20 C16 Yb2 75.8(6) . . ? 
C17 C16 Yb2 74.4(5) . . ? 
C20 C16 H16 126.2 . . ? 
C17 C16 H16 126.2 . . ? 
Yb2 C16 H16 115.9 . . ? 
C18 C17 C16 105.8(11) . . ? 
C18 C17 Yb2 74.8(5) . . ? 
C16 C17 Yb2 74.2(5) . . ? 
C18 C17 H17 127.1 . . ? 
C16 C17 H17 127.1 . . ? 
Yb2 C17 H17 116.3 . . ? 
C19 C18 C17 108.6(11) . . ? 
C19 C18 Yb2 75.7(6) . . ? 
C17 C18 Yb2 74.3(5) . . ? 
C19 C18 H18 125.7 . . ? 
C17 C18 H18 125.7 . . ? 
Yb2 C18 H18 116.3 . . ? 
C18 C19 C20 109.6(11) . . ? 
C18 C19 Yb2 74.5(6) . . ? 
C20 C19 Yb2 75.0(6) . . ? 
C18 C19 H19 125.2 . . ? 
C20 C19 H19 125.2 . . ? 
Yb2 C19 H19 117.1 . . ? 
C19 C20 C16 108.3(11) . . ? 
C19 C20 Yb2 75.2(6) . . ? 
C16 C20 Yb2 73.9(6) . . ? 
C19 C20 H20 125.8 . . ? 
C16 C20 H20 125.8 . . ? 
Yb2 C20 H20 117.1 . . ? 
N3 C21 N1 112.8(6) . . ? 
N3 C21 C22 121.0(7) . . ? 
N1 C21 C22 126.2(7) . . ? 
C23 C22 C21 115.7(7) . . ? 
C23 C22 H22 122.1 . . ? 
C21 C22 H22 122.1 . . ? 
C24 C23 C22 123.4(7) . . ? 
C24 C23 H23 118.3 . . ? 
C22 C23 H23 118.3 . . ? 
C23 C24 C25 118.7(8) . . ? 
C23 C24 H24 120.6 . . ? 
C25 C24 H24 120.6 . . ? 
N3 C25 N2 119.0(6) . . ? 
N3 C25 C24 119.6(7) . . ? 
N2 C25 C24 121.4(7) . . ? 
O1 C26 C27 107.6(11) . . ? 
O1 C26 H26A 110.2 . . ? 
C27 C26 H26A 110.2 . . ? 
O1 C26 H26B 110.2 . . ? 
C27 C26 H26B 110.2 . . ? 
H26A C26 H26B 108.5 . . ? 
C28 C27 C26 108.9(11) . . ? 
C28 C27 H27A 109.9 . . ? 
C26 C27 H27A 109.9 . . ? 
C28 C27 H27B 109.9 . . ? 
C26 C27 H27B 109.9 . . ? 
H27A C27 H27B 108.3 . . ? 
C27 C28 C29 106.6(13) . . ? 
C27 C28 H28A 110.4 . . ? 
C29 C28 H28A 110.4 . . ? 
C27 C28 H28B 110.4 . . ? 
C29 C28 H28B 110.4 . . ? 
H28A C28 H28B 108.6 . . ? 
O1 C29 C28 110.3(9) . . ? 
O1 C29 H29A 109.6 . . ? 
C28 C29 H29A 109.6 . . ? 
O1 C29 H29B 109.6 . . ? 
C28 C29 H29B 109.6 . . ? 
H29A C29 H29B 108.1 . . ? 
O2 C30 C31 106.7(7) . . ? 
O2 C30 H30A 110.4 . . ? 
C31 C30 H30A 110.4 . . ? 
O2 C30 H30B 110.4 . . ? 
C31 C30 H30B 110.4 . . ? 
H30A C30 H30B 108.6 . . ? 
C32 C31 C30 104.6(9) . . ? 
C32 C31 H31A 110.8 . . ? 
C30 C31 H31A 110.8 . . ? 
C32 C31 H31B 110.8 . . ? 
C30 C31 H31B 110.8 . . ? 
H31A C31 H31B 108.9 . . ? 
C31 C32 C33 104.6(7) . . ? 
C31 C32 H32A 110.8 . . ? 
C33 C32 H32A 110.8 . . ? 
C31 C32 H32B 110.8 . . ? 
C33 C32 H32B 110.8 . . ? 
H32A C32 H32B 108.9 . . ? 
O2 C33 C32 106.4(7) . . ? 
O2 C33 H33A 110.4 . . ? 
C32 C33 H33A 110.4 . . ? 
O2 C33 H33B 110.4 . . ? 
C32 C33 H33B 110.4 . . ? 
H33A C33 H33B 108.6 . . ? 
  
_diffrn_measured_fraction_theta_max    0.998 
_diffrn_reflns_theta_full              25.01 
_diffrn_measured_fraction_theta_full   0.998 
_refine_diff_density_max    1.355 
_refine_diff_density_min   -0.931 
_refine_diff_density_rms    0.132

#================END

  
data_f60526b 
  
_audit_creation_method            SHELXL-97 
_chemical_name_systematic 
; 
 ? 
; 
_chemical_name_common             ? 
_chemical_melting_point           ? 
_chemical_formula_moiety          ? 
_chemical_formula_sum 
 'C55 H77 N7 O Yb2' 
_chemical_formula_weight          1198.32 
  
loop_ 
 _atom_type_symbol 
 _atom_type_description 
 _atom_type_scat_dispersion_real 
 _atom_type_scat_dispersion_imag 
 _atom_type_scat_source 
 'C'  'C'   0.0033   0.0016 
 'International Tables Vol C Tables 4.2.6.8 and 6.1.1.4' 
 'H'  'H'   0.0000   0.0000 
 'International Tables Vol C Tables 4.2.6.8 and 6.1.1.4' 
 'N'  'N'   0.0061   0.0033 
 'International Tables Vol C Tables 4.2.6.8 and 6.1.1.4' 
 'O'  'O'   0.0106   0.0060 
 'International Tables Vol C Tables 4.2.6.8 and 6.1.1.4' 
 'Yb'  'Yb'  -0.3850   5.5486 
 'International Tables Vol C Tables 4.2.6.8 and 6.1.1.4' 
  
_symmetry_cell_setting            Orthorhombic 
_symmetry_space_group_name_H-M    Pbcn 
  
loop_ 
 _symmetry_equiv_pos_as_xyz 
 'x, y, z' 
 '-x+1/2, -y+1/2, z+1/2' 
 '-x, y, -z+1/2' 
 'x+1/2, -y+1/2, -z' 
 '-x, -y, -z' 
 'x-1/2, y-1/2, -z-1/2' 
 'x, -y, z-1/2' 
 '-x-1/2, y-1/2, z' 
  
_cell_length_a                    39.077(10) 
_cell_length_b                    9.963(3) 
_cell_length_c                    27.155(7) 
_cell_angle_alpha                 90.00 
_cell_angle_beta                  90.00 
_cell_angle_gamma                 90.00 
_cell_volume                      10572(5) 
_cell_formula_units_Z             8 
_cell_measurement_temperature     293(2) 
_cell_measurement_reflns_used     1009 
_cell_measurement_theta_min       2.568 
_cell_measurement_theta_max       20.621 
  
_exptl_crystal_description        ? 
_exptl_crystal_colour             ? 
_exptl_crystal_size_max           0.25 
_exptl_crystal_size_mid           0.20 
_exptl_crystal_size_min           0.15 
_exptl_crystal_density_meas       ? 
_exptl_crystal_density_diffrn     1.506 
_exptl_crystal_density_method     'not measured' 
_exptl_crystal_F_000              4832 
_exptl_absorpt_coefficient_mu     3.560 
_exptl_absorpt_correction_type    multi-scan 
_exptl_absorpt_correction_T_min   0.4697 
_exptl_absorpt_correction_T_max   0.6172 
_exptl_absorpt_process_details    sadabs 
  
_exptl_special_details 
; 
 ? 
; 
  
_diffrn_ambient_temperature       293(2) 
_diffrn_radiation_wavelength      0.71073 
_diffrn_radiation_type            MoK\a 
_diffrn_radiation_source          'fine-focus sealed tube' 
_diffrn_radiation_monochromator   graphite 
_diffrn_measurement_device_type   'CCD area detector' 
_diffrn_measurement_method        'phi and omega scans' 
_diffrn_detector_area_resol_mean  ? 
_diffrn_standards_number          ? 
_diffrn_standards_interval_count  ? 
_diffrn_standards_interval_time   ? 
_diffrn_standards_decay_%         9.28 
_diffrn_reflns_number             46434 
_diffrn_reflns_av_R_equivalents   0.0977 
_diffrn_reflns_av_sigmaI/netI     0.1035 
_diffrn_reflns_limit_h_min        -48 
_diffrn_reflns_limit_h_max        39 
_diffrn_reflns_limit_k_min        -12 
_diffrn_reflns_limit_k_max        12 
_diffrn_reflns_limit_l_min        -33 
_diffrn_reflns_limit_l_max        32 
_diffrn_reflns_theta_min          1.04 
_diffrn_reflns_theta_max          26.01 
_reflns_number_total              10395 
_reflns_number_gt                 5262 
_reflns_threshold_expression      >2sigma(I) 
  
_computing_data_collection        'Bruker SMART' 
_computing_cell_refinement        'Bruker SMART' 
_computing_data_reduction         'Bruker SHELXTL' 
_computing_structure_solution     'SHELXS-97 (Sheldrick, 1990)' 
_computing_structure_refinement   'SHELXL-97 (Sheldrick, 1997)' 
_computing_molecular_graphics     'Bruker SHELXTL' 
_computing_publication_material   'Bruker SHELXTL' 
  
_refine_special_details 
; 
 Refinement of F^2^ against ALL reflections.  The weighted R-factor wR and 
 goodness of fit S are based on F^2^, conventional R-factors R are based 
 on F, with F set to zero for negative F^2^. The threshold expression of 
 F^2^ > 2sigma(F^2^) is used only for calculating R-factors(gt) etc. and is 
 not relevant to the choice of reflections for refinement.  R-factors based 
 on F^2^ are statistically about twice as large as those based on F, and R- 
 factors based on ALL data will be even larger. 
; 
  
_refine_ls_structure_factor_coef  Fsqd 
_refine_ls_matrix_type            full 
_refine_ls_weighting_scheme       calc 
_refine_ls_weighting_details 
 'calc w=1/[\s^2^(Fo^2^)+(0.0417P)^2^+0.0000P] where P=(Fo^2^+2Fc^2^)/3' 
_atom_sites_solution_primary      direct 
_atom_sites_solution_secondary    difmap 
_atom_sites_solution_hydrogens    geom 
_refine_ls_hydrogen_treatment     constr 
_refine_ls_extinction_method      none 
_refine_ls_extinction_coef        ? 
_refine_ls_number_reflns          10395 
_refine_ls_number_parameters      622 
_refine_ls_number_restraints      0 
_refine_ls_R_factor_all           0.1377 
_refine_ls_R_factor_gt            0.0620 
_refine_ls_wR_factor_ref          0.1248 
_refine_ls_wR_factor_gt           0.1086 
_refine_ls_goodness_of_fit_ref    1.034 
_refine_ls_restrained_S_all       1.034 
_refine_ls_shift/su_max           0.009 
_refine_ls_shift/su_mean          0.001 
  
loop_ 
 _atom_site_label 
 _atom_site_type_symbol 
 _atom_site_fract_x 
 _atom_site_fract_y 
 _atom_site_fract_z 
 _atom_site_U_iso_or_equiv 
 _atom_site_adp_type 
 _atom_site_occupancy 
 _atom_site_symmetry_multiplicity 
 _atom_site_calc_flag 
 _atom_site_refinement_flags 
 _atom_site_disorder_assembly 
 _atom_site_disorder_group 
Yb1 Yb 0.154459(10) 0.07084(4) 0.999445(17) 0.04827(13) Uani 1 1 d . . . 
Yb2 Yb 0.101676(12) -0.00803(5) 0.781640(15) 0.06249(16) Uani 1 1 d . . . 
N1 N 0.12594(16) 0.2747(7) 0.9795(2) 0.0347(17) Uani 1 1 d . . . 
N2 N 0.13268(19) 0.4309(8) 1.0419(3) 0.050(2) Uani 1 1 d . . . 
N3 N 0.0825(2) 0.5279(10) 1.0751(3) 0.086(3) Uani 1 1 d . . . 
H3 H 0.0727 0.5243 1.0468 0.103 Uiso 1 1 calc R . . 
N4 N 0.1335(2) 0.5388(8) 1.1164(3) 0.069(3) Uani 1 1 d . A . 
H4 H 0.1232 0.5904 1.1370 0.083 Uiso 1 1 calc R . . 
N5 N 0.12578(16) 0.1120(7) 0.9230(2) 0.0321(17) Uani 1 1 d . . . 
N6 N 0.13749(19) 0.0880(7) 0.8355(2) 0.0437(19) Uani 1 1 d . . . 
N7 N 0.08928(18) -0.0017(8) 0.8632(2) 0.0445(18) Uani 1 1 d . . . 
C1 C 0.0950(3) 0.024(2) 1.0437(4) 0.096(5) Uani 1 1 d . . . 
H1A H 0.0727 0.0374 1.0280 0.115 Uiso 1 1 calc R . . 
C2 C 0.1114(5) -0.0930(15) 1.0447(6) 0.108(6) Uani 1 1 d . . . 
H2A H 0.1027 -0.1771 1.0309 0.129 Uiso 1 1 calc R . . 
C3 C 0.1391(5) -0.083(2) 1.0748(6) 0.120(7) Uani 1 1 d . . . 
H3A H 0.1528 -0.1572 1.0879 0.144 Uiso 1 1 calc R . . 
C4 C 0.1381(4) 0.0546(19) 1.0933(4) 0.090(4) Uani 1 1 d . . . 
H4A H 0.1514 0.0904 1.1209 0.108 Uiso 1 1 calc R . . 
C5 C 0.1099(4) 0.1130(15) 1.0721(5) 0.090(4) Uani 1 1 d . . . 
H5A H 0.1002 0.2003 1.0812 0.108 Uiso 1 1 calc R . . 
C6 C 0.2058(3) 0.2194(14) 0.9680(5) 0.078(3) Uani 1 1 d . . . 
H6A H 0.2047 0.2835 0.9407 0.093 Uiso 1 1 calc R . . 
C7 C 0.2174(3) 0.0908(15) 0.9645(5) 0.076(4) Uani 1 1 d . . . 
H7A H 0.2256 0.0483 0.9342 0.092 Uiso 1 1 calc R . . 
C8 C 0.2206(3) 0.0373(13) 1.0115(5) 0.092(4) Uani 1 1 d . . . 
H8A H 0.2322 -0.0465 1.0204 0.111 Uiso 1 1 calc R . . 
C9 C 0.2112(3) 0.1439(17) 1.0445(5) 0.097(5) Uani 1 1 d . . . 
H9A H 0.2149 0.1445 1.0802 0.116 Uiso 1 1 calc R . . 
C10 C 0.2011(3) 0.2510(13) 1.0167(4) 0.071(4) Uani 1 1 d . . . 
H10A H 0.1967 0.3414 1.0295 0.086 Uiso 1 1 calc R . . 
C11 C 0.1147(2) 0.2364(9) 0.9339(3) 0.038(2) Uani 1 1 d . . . 
C12 C 0.0947(2) 0.3220(9) 0.9053(3) 0.050(3) Uani 1 1 d . . . 
H12A H 0.0868 0.2950 0.8746 0.060 Uiso 1 1 calc R . . 
C13 C 0.0869(2) 0.4449(10) 0.9231(4) 0.058(3) Uani 1 1 d . . . 
H13A H 0.0733 0.5022 0.9044 0.070 Uiso 1 1 calc R . . 
C14 C 0.0985(2) 0.4864(10) 0.9678(4) 0.060(3) Uani 1 1 d . . . 
H14A H 0.0935 0.5723 0.9791 0.073 Uiso 1 1 calc R . . 
C15 C 0.1178(2) 0.3996(9) 0.9963(4) 0.051(2) Uani 1 1 d . . . 
C16 C 0.1157(3) 0.4945(11) 1.0757(3) 0.058(3) Uani 1 1 d . . . 
C17 C 0.0610(3) 0.5687(12) 1.1152(4) 0.076(4) Uani 1 1 d . . . 
H17A H 0.0721 0.6402 1.1341 0.092 Uiso 1 1 calc R . . 
C18 C 0.0271(3) 0.6190(14) 1.0941(5) 0.110(5) Uani 1 1 d . . . 
H18A H 0.0308 0.7013 1.0758 0.132 Uiso 1 1 calc R . . 
H18B H 0.0176 0.5525 1.0719 0.132 Uiso 1 1 calc R . . 
C19 C 0.0026(3) 0.6442(19) 1.1363(7) 0.144(7) Uani 1 1 d . . . 
H19A H 0.0117 0.7158 1.1567 0.172 Uiso 1 1 calc R . . 
H19B H -0.0191 0.6746 1.1230 0.172 Uiso 1 1 calc R . . 
C20 C -0.0034(4) 0.5267(17) 1.1671(7) 0.135(6) Uani 1 1 d . . . 
H20A H -0.0144 0.4571 1.1478 0.162 Uiso 1 1 calc R . . 
H20B H -0.0186 0.5504 1.1940 0.162 Uiso 1 1 calc R . . 
C21 C 0.0293(4) 0.4754(19) 1.1873(6) 0.163(8) Uani 1 1 d . . . 
H21A H 0.0389 0.5415 1.2096 0.196 Uiso 1 1 calc R . . 
H21B H 0.0250 0.3942 1.2060 0.196 Uiso 1 1 calc R . . 
C22 C 0.0534(4) 0.4472(14) 1.1490(5) 0.108(5) Uani 1 1 d . . . 
H22A H 0.0447 0.3741 1.1291 0.130 Uiso 1 1 calc R . . 
H22B H 0.0746 0.4173 1.1639 0.130 Uiso 1 1 calc R . . 
C23 C 0.1684(4) 0.503(2) 1.1258(6) 0.100(6) Uani 1 1 d . . . 
C26 C 0.2339(4) 0.488(2) 1.1803(6) 0.113(6) Uani 1 1 d . . . 
C24 C 0.1851(6) 0.6395(19) 1.1516(8) 0.063(6) Uani 0.50 1 d P A 1 
H24A H 0.1807 0.7166 1.1307 0.075 Uiso 0.50 1 calc PR A 1 
H24B H 0.1742 0.6554 1.1831 0.075 Uiso 0.50 1 calc PR A 1 
C25 C 0.2224(8) 0.625(3) 1.1589(11) 0.111(12) Uani 0.50 1 d P A 1 
H25A H 0.2301 0.6956 1.1809 0.133 Uiso 0.50 1 calc PR A 1 
H25D H 0.2337 0.6381 1.1275 0.133 Uiso 0.50 1 calc PR A 1 
C27 C 0.2154(12) 0.383(3) 1.1454(13) 0.142(16) Uani 0.50 1 d P A 1 
H27A H 0.2269 0.3846 1.1137 0.171 Uiso 0.50 1 calc PR A 1 
H27B H 0.2191 0.2940 1.1592 0.171 Uiso 0.50 1 calc PR A 1 
C28 C 0.1774(7) 0.398(3) 1.1359(9) 0.074(9) Uani 0.50 1 d P A 1 
H28A H 0.1711 0.3373 1.1095 0.089 Uiso 0.50 1 calc PR A 1 
H28D H 0.1652 0.3694 1.1652 0.089 Uiso 0.50 1 calc PR A 1 
C24' C 0.1942(9) 0.553(3) 1.1132(9) 0.091(9) Uani 0.50 1 d P A 2 
H24C H 0.1938 0.6449 1.1245 0.109 Uiso 0.50 1 calc PR A 2 
H24D H 0.1940 0.5551 1.0775 0.109 Uiso 0.50 1 calc PR A 2 
C25' C 0.2300(6) 0.490(5) 1.1296(13) 0.124(13) Uani 0.50 1 d P A 2 
H25B H 0.2317 0.3992 1.1171 0.149 Uiso 0.50 1 calc PR A 2 
H25C H 0.2484 0.5423 1.1151 0.149 Uiso 0.50 1 calc PR A 2 
C27' C 0.2064(6) 0.415(3) 1.2019(8) 0.092(9) Uani 0.50 1 d P A 2 
H27C H 0.2089 0.4166 1.2374 0.110 Uiso 0.50 1 calc PR A 2 
H27D H 0.2078 0.3223 1.1913 0.110 Uiso 0.50 1 calc PR A 2 
C28' C 0.1712(5) 0.470(2) 1.1885(7) 0.065(6) Uani 0.50 1 d P A 2 
H28B H 0.1670 0.5519 1.2068 0.078 Uiso 0.50 1 calc PR A 2 
H28C H 0.1538 0.4052 1.1977 0.078 Uiso 0.50 1 calc PR A 2 
C29 C 0.1173(2) 0.0663(9) 0.8751(3) 0.041(2) Uani 1 1 d . . . 
C30 C 0.1697(2) 0.1619(10) 0.8410(3) 0.051(3) Uani 1 1 d . . . 
H30A H 0.1754 0.1659 0.8761 0.061 Uiso 1 1 calc R . . 
C31 C 0.1672(3) 0.3050(12) 0.8216(5) 0.088(4) Uani 1 1 d . . . 
H31A H 0.1595 0.3029 0.7876 0.105 Uiso 1 1 calc R . . 
H31B H 0.1503 0.3539 0.8406 0.105 Uiso 1 1 calc R . . 
C32 C 0.2008(3) 0.3768(12) 0.8244(5) 0.100(4) Uani 1 1 d . . . 
H32A H 0.2071 0.3874 0.8587 0.120 Uiso 1 1 calc R . . 
H32B H 0.1981 0.4658 0.8103 0.120 Uiso 1 1 calc R . . 
C33 C 0.2294(3) 0.3046(13) 0.7976(5) 0.090(4) Uani 1 1 d . . . 
H33A H 0.2247 0.3027 0.7626 0.108 Uiso 1 1 calc R . . 
H33B H 0.2508 0.3515 0.8028 0.108 Uiso 1 1 calc R . . 
C34 C 0.2319(3) 0.1660(13) 0.8169(5) 0.097(4) Uani 1 1 d . . . 
H34A H 0.2395 0.1693 0.8509 0.117 Uiso 1 1 calc R . . 
H34B H 0.2490 0.1174 0.7981 0.117 Uiso 1 1 calc R . . 
C35 C 0.1985(3) 0.0912(10) 0.8144(4) 0.075(3) Uani 1 1 d . . . 
H35A H 0.2016 0.0028 0.8286 0.090 Uiso 1 1 calc R . . 
H35B H 0.1922 0.0796 0.7801 0.090 Uiso 1 1 calc R . . 
C36 C 0.0630(2) -0.0327(11) 0.9013(3) 0.058(3) Uani 1 1 d . . . 
H36A H 0.0680 0.0200 0.9309 0.069 Uiso 1 1 calc R . . 
C37 C 0.0288(3) 0.0058(15) 0.8823(5) 0.128(6) Uani 1 1 d . . . 
H37A H 0.0242 -0.0422 0.8520 0.154 Uiso 1 1 calc R . . 
H37B H 0.0285 0.1012 0.8752 0.154 Uiso 1 1 calc R . . 
C38 C 0.0011(3) -0.0266(17) 0.9199(6) 0.145(7) Uani 1 1 d . . . 
H38A H 0.0046 0.0279 0.9491 0.174 Uiso 1 1 calc R . . 
H38B H -0.0210 -0.0033 0.9062 0.174 Uiso 1 1 calc R . . 
C39 C 0.0008(3) -0.1701(15) 0.9343(5) 0.099(5) Uani 1 1 d . . . 
H39A H -0.0161 -0.1848 0.9598 0.118 Uiso 1 1 calc R . . 
H39B H -0.0051 -0.2251 0.9061 0.118 Uiso 1 1 calc R . . 
C40 C 0.0349(3) -0.2084(13) 0.9526(5) 0.116(5) Uani 1 1 d . . . 
H40A H 0.0355 -0.3041 0.9592 0.139 Uiso 1 1 calc R . . 
H40B H 0.0397 -0.1615 0.9832 0.139 Uiso 1 1 calc R . . 
C41 C 0.0625(3) -0.1729(12) 0.9141(5) 0.113(5) Uani 1 1 d . . . 
H41A H 0.0848 -0.1980 0.9270 0.136 Uiso 1 1 calc R . . 
H41B H 0.0585 -0.2253 0.8846 0.136 Uiso 1 1 calc R . . 
C42 C 0.0825(7) 0.2358(16) 0.7613(7) 0.107(6) Uani 1 1 d . . . 
H42A H 0.0881 0.3169 0.7801 0.129 Uiso 1 1 calc R . . 
C43 C 0.0986(4) 0.192(2) 0.7175(10) 0.132(8) Uani 1 1 d . . . 
H43A H 0.1178 0.2343 0.7005 0.158 Uiso 1 1 calc R . . 
C44 C 0.0778(7) 0.091(2) 0.6997(7) 0.131(8) Uani 1 1 d . . . 
H44A H 0.0811 0.0486 0.6675 0.157 Uiso 1 1 calc R . . 
C45 C 0.0499(5) 0.078(2) 0.7261(10) 0.146(9) Uani 1 1 d . . . 
H45A H 0.0293 0.0275 0.7171 0.176 Uiso 1 1 calc R . . 
C46 C 0.0531(6) 0.166(2) 0.7634(6) 0.122(7) Uani 1 1 d . . . 
H46A H 0.0346 0.1859 0.7866 0.146 Uiso 1 1 calc R . . 
C47 C 0.1450(4) -0.2071(15) 0.7797(7) 0.106(5) Uani 1 1 d . . . 
H47A H 0.1678 -0.2092 0.7948 0.127 Uiso 1 1 calc R . . 
C48 C 0.1371(6) -0.1726(18) 0.7298(7) 0.139(8) Uani 1 1 d . . . 
H48A H 0.1536 -0.1488 0.7040 0.166 Uiso 1 1 calc R . . 
C49 C 0.1056(7) -0.213(2) 0.7230(10) 0.171(12) Uani 1 1 d . . . 
H49A H 0.0948 -0.2141 0.6905 0.205 Uiso 1 1 calc R . . 
C50 C 0.0902(7) -0.263(2) 0.7629(9) 0.185(12) Uani 1 1 d . . . 
H50A H 0.0683 -0.3103 0.7645 0.221 Uiso 1 1 calc R . . 
C51 C 0.1160(5) -0.2606(14) 0.7983(5) 0.102(5) Uani 1 1 d . . . 
H51A H 0.1144 -0.3038 0.8306 0.122 Uiso 1 1 calc R . . 
O1 O 0.16414(18) -0.1487(7) 0.9631(3) 0.071(2) Uani 1 1 d . . . 
C52 C 0.1643(3) -0.1793(11) 0.9139(5) 0.090(4) Uani 1 1 d . . . 
H52A H 0.1767 -0.1109 0.8958 0.108 Uiso 1 1 calc R . . 
H52B H 0.1411 -0.1828 0.9015 0.108 Uiso 1 1 calc R . . 
C53 C 0.1806(5) -0.3071(17) 0.9076(5) 0.182(9) Uani 1 1 d . . . 
H53A H 0.1654 -0.3672 0.8901 0.219 Uiso 1 1 calc R . . 
H53B H 0.2012 -0.2963 0.8881 0.219 Uiso 1 1 calc R . . 
C54 C 0.1889(3) -0.3620(13) 0.9528(5) 0.095(4) Uani 1 1 d . . . 
H54A H 0.2133 -0.3779 0.9551 0.113 Uiso 1 1 calc R . . 
H54B H 0.1770 -0.4462 0.9578 0.113 Uiso 1 1 calc R . . 
C55 C 0.1783(4) -0.2652(13) 0.9879(5) 0.138(7) Uani 1 1 d . . . 
H55A H 0.1977 -0.2382 1.0079 0.166 Uiso 1 1 calc R . . 
H55B H 0.1612 -0.3040 1.0095 0.166 Uiso 1 1 calc R . . 
  
loop_ 
 _atom_site_aniso_label 
 _atom_site_aniso_U_11 
 _atom_site_aniso_U_22 
 _atom_site_aniso_U_33 
 _atom_site_aniso_U_23 
 _atom_site_aniso_U_13 
 _atom_site_aniso_U_12 
Yb1 0.0525(2) 0.0490(2) 0.0433(2) 0.0035(2) -0.0031(2) 0.0095(2) 
Yb2 0.0758(3) 0.0718(3) 0.0398(2) -0.0119(3) 0.0019(2) -0.0053(3) 
N1 0.036(4) 0.038(5) 0.030(4) -0.004(3) -0.002(3) 0.013(3) 
N2 0.058(5) 0.045(5) 0.047(5) -0.015(4) -0.007(4) 0.019(4) 
N3 0.053(6) 0.133(10) 0.071(7) -0.037(6) -0.017(5) 0.042(6) 
N4 0.062(6) 0.076(7) 0.069(6) -0.042(5) -0.012(5) 0.017(5) 
N5 0.034(5) 0.030(5) 0.033(4) 0.000(3) 0.007(3) 0.004(3) 
N6 0.051(5) 0.043(5) 0.036(4) 0.002(4) 0.015(4) -0.006(4) 
N7 0.053(5) 0.040(5) 0.040(4) -0.003(4) -0.010(4) -0.007(4) 
C1 0.082(10) 0.152(18) 0.054(8) 0.003(9) 0.033(7) -0.011(11) 
C2 0.159(17) 0.045(10) 0.121(15) 0.010(9) 0.077(13) -0.016(10) 
C3 0.156(17) 0.131(17) 0.073(11) 0.080(11) 0.016(10) 0.057(13) 
C4 0.103(12) 0.139(15) 0.029(6) -0.001(8) 0.008(7) -0.015(10) 
C5 0.111(14) 0.097(12) 0.061(9) 0.014(9) 0.041(8) 0.006(10) 
C6 0.053(8) 0.085(10) 0.096(10) 0.001(8) 0.011(7) -0.012(7) 
C7 0.046(7) 0.108(11) 0.075(9) -0.021(8) 0.009(6) 0.000(7) 
C8 0.055(8) 0.093(11) 0.128(13) 0.005(9) -0.029(7) 0.028(7) 
C9 0.061(9) 0.145(14) 0.085(10) -0.011(10) -0.026(7) 0.023(9) 
C10 0.065(8) 0.081(10) 0.069(8) -0.020(6) -0.015(6) 0.010(7) 
C11 0.034(5) 0.040(6) 0.038(5) 0.003(4) 0.002(4) 0.000(4) 
C12 0.058(7) 0.048(7) 0.044(6) 0.000(5) -0.015(5) 0.013(5) 
C13 0.061(7) 0.049(7) 0.064(7) -0.002(5) -0.018(5) 0.024(5) 
C14 0.068(7) 0.037(6) 0.076(7) -0.015(6) -0.018(6) 0.029(6) 
C15 0.044(6) 0.056(7) 0.054(6) -0.018(6) -0.003(5) 0.006(5) 
C16 0.069(8) 0.049(7) 0.056(7) -0.008(6) -0.016(5) 0.008(6) 
C17 0.064(8) 0.104(10) 0.060(7) -0.004(7) 0.005(6) 0.029(7) 
C18 0.079(10) 0.160(14) 0.090(10) 0.025(9) 0.005(8) 0.075(9) 
C19 0.075(12) 0.18(2) 0.18(2) 0.021(15) -0.007(10) 0.047(11) 
C20 0.095(13) 0.142(18) 0.169(17) 0.013(14) 0.042(11) 0.016(11) 
C21 0.092(12) 0.24(2) 0.153(16) 0.045(15) 0.006(11) 0.075(14) 
C22 0.114(12) 0.127(13) 0.083(10) 0.006(9) -0.017(8) 0.048(10) 
C23 0.063(11) 0.131(16) 0.106(12) -0.086(13) 0.003(9) 0.006(12) 
C26 0.081(11) 0.181(19) 0.078(11) -0.039(12) -0.019(8) -0.025(12) 
C24 0.078(18) 0.038(13) 0.073(16) -0.015(11) -0.013(13) -0.023(12) 
C25 0.11(3) 0.14(3) 0.08(2) -0.04(2) 0.030(19) -0.09(2) 
C27 0.22(5) 0.10(3) 0.11(3) -0.07(2) -0.06(3) 0.08(3) 
C28 0.08(2) 0.08(2) 0.063(16) -0.026(15) 0.003(14) 0.017(17) 
C24' 0.13(3) 0.09(2) 0.057(16) 0.029(15) 0.004(17) 0.03(2) 
C25' 0.031(17) 0.19(4) 0.15(3) 0.02(3) 0.051(18) 0.00(2) 
C27' 0.09(2) 0.14(3) 0.044(14) 0.010(15) -0.012(13) 0.069(19) 
C28' 0.083(16) 0.071(17) 0.041(11) 0.006(11) 0.007(11) -0.029(13) 
C29 0.058(6) 0.022(5) 0.045(5) -0.001(4) 0.006(5) 0.016(5) 
C30 0.054(7) 0.059(7) 0.041(6) -0.010(5) 0.014(5) -0.009(6) 
C31 0.067(9) 0.066(9) 0.130(12) -0.008(8) 0.032(7) -0.005(7) 
C32 0.101(11) 0.066(9) 0.133(12) 0.012(8) 0.029(9) -0.018(8) 
C33 0.077(9) 0.080(10) 0.113(11) -0.004(8) 0.034(8) -0.015(7) 
C34 0.058(9) 0.083(11) 0.150(13) 0.010(9) 0.044(8) -0.007(7) 
C35 0.071(8) 0.056(8) 0.097(9) 0.009(6) 0.036(7) 0.010(6) 
C36 0.044(7) 0.086(10) 0.043(6) -0.013(5) 0.007(5) -0.020(6) 
C37 0.070(10) 0.147(13) 0.168(14) 0.083(12) 0.063(9) 0.037(9) 
C38 0.086(11) 0.146(17) 0.202(18) 0.071(14) 0.070(10) 0.046(10) 
C39 0.057(10) 0.123(13) 0.115(13) -0.031(10) 0.019(7) -0.024(8) 
C40 0.095(11) 0.088(11) 0.166(14) 0.063(10) 0.056(10) 0.001(9) 
C41 0.072(9) 0.082(10) 0.185(14) 0.075(10) 0.061(9) 0.022(7) 
C42 0.150(17) 0.087(12) 0.085(13) 0.000(9) -0.068(14) 0.036(12) 
C43 0.112(15) 0.148(17) 0.135(16) 0.129(14) 0.039(14) 0.042(14) 
C44 0.17(2) 0.151(19) 0.076(12) -0.016(12) -0.071(14) 0.047(16) 
C45 0.068(13) 0.22(2) 0.15(2) 0.028(18) -0.032(12) -0.016(14) 
C46 0.118(17) 0.19(2) 0.058(10) -0.010(12) -0.002(11) 0.068(14) 
C47 0.112(13) 0.069(10) 0.138(16) -0.044(10) 0.021(11) 0.025(9) 
C48 0.25(3) 0.098(14) 0.065(13) -0.017(9) 0.083(14) 0.050(16) 
C49 0.23(3) 0.113(19) 0.17(2) -0.066(17) -0.05(2) 0.04(2) 
C50 0.32(3) 0.138(18) 0.100(14) -0.054(14) 0.03(2) -0.106(18) 
C51 0.172(16) 0.074(10) 0.059(9) -0.022(7) -0.009(11) -0.014(10) 
O1 0.113(6) 0.051(5) 0.048(4) 0.006(4) -0.007(4) 0.030(4) 
C52 0.118(11) 0.055(9) 0.098(10) 0.008(7) -0.012(8) 0.031(8) 
C53 0.31(2) 0.153(17) 0.082(11) 0.012(11) 0.036(13) 0.166(17) 
C54 0.099(10) 0.066(9) 0.118(12) 0.011(9) 0.021(8) 0.035(8) 
C55 0.256(19) 0.077(10) 0.083(11) -0.003(8) -0.044(11) 0.087(12) 
  
_geom_special_details 
; 
 All esds (except the esd in the dihedral angle between two l.s. planes) 
 are estimated using the full covariance matrix.  The cell esds are taken 
 into account individually in the estimation of esds in distances, angles 
 and torsion angles; correlations between esds in cell parameters are only 
 used when they are defined by crystal symmetry.  An approximate (isotropic) 
 treatment of cell esds is used for estimating esds involving l.s. planes. 
; 
  
loop_ 
 _geom_bond_atom_site_label_1 
 _geom_bond_atom_site_label_2 
 _geom_bond_distance 
 _geom_bond_site_symmetry_2 
 _geom_bond_publ_flag 
Yb1 N1 2.379(7) . ? 
Yb1 N5 2.393(6) . ? 
Yb1 O1 2.429(7) . ? 
Yb1 C10 2.600(12) . ? 
Yb1 C3 2.626(12) . ? 
Yb1 C8 2.627(10) . ? 
Yb1 C4 2.632(10) . ? 
Yb1 C9 2.635(11) . ? 
Yb1 C6 2.637(11) . ? 
Yb1 C7 2.643(10) . ? 
Yb1 C2 2.646(12) . ? 
Yb1 C1 2.657(12) . ? 
Yb2 N6 2.239(7) . ? 
Yb2 N7 2.267(7) . ? 
Yb2 C48 2.566(14) . ? 
Yb2 C49 2.59(2) . ? 
Yb2 C42 2.601(14) . ? 
Yb2 C47 2.609(13) . ? 
Yb2 C44 2.607(15) . ? 
Yb2 C46 2.616(15) . ? 
Yb2 C51 2.617(14) . ? 
Yb2 C50 2.625(18) . ? 
Yb2 C43 2.646(11) . ? 
Yb2 C45 2.667(16) . ? 
N1 C15 1.363(10) . ? 
N1 C11 1.369(9) . ? 
N2 C16 1.299(11) . ? 
N2 C15 1.402(11) . ? 
N3 C16 1.339(11) . ? 
N3 C17 1.434(12) . ? 
N4 C16 1.379(11) . ? 
N4 C23 1.432(16) . ? 
N5 C11 1.345(10) . ? 
N5 C29 1.419(10) . ? 
N6 C29 1.349(10) . ? 
N6 C30 1.467(10) . ? 
N7 C29 1.329(10) . ? 
N7 C36 1.490(10) . ? 
C1 C5 1.311(16) . ? 
C1 C2 1.332(18) . ? 
C2 C3 1.359(19) . ? 
C3 C4 1.460(18) . ? 
C4 C5 1.374(16) . ? 
C6 C7 1.361(15) . ? 
C6 C10 1.372(13) . ? 
C7 C8 1.390(15) . ? 
C8 C9 1.436(16) . ? 
C9 C10 1.365(15) . ? 
C11 C12 1.394(11) . ? 
C12 C13 1.350(12) . ? 
C13 C14 1.361(12) . ? 
C14 C15 1.385(12) . ? 
C17 C18 1.526(13) . ? 
C17 C22 1.548(15) . ? 
C18 C19 1.514(17) . ? 
C19 C20 1.459(18) . ? 
C20 C21 1.481(17) . ? 
C21 C22 1.430(16) . ? 
C23 C28 1.14(3) . ? 
C23 C24' 1.17(3) . ? 
C23 C24 1.66(2) . ? 
C23 C28' 1.74(3) . ? 
C26 C25' 1.39(3) . ? 
C26 C27' 1.43(3) . ? 
C26 C25 1.55(3) . ? 
C26 C27 1.59(3) . ? 
C24 C25 1.48(3) . ? 
C27 C28 1.51(4) . ? 
C24' C25' 1.59(4) . ? 
C27' C28' 1.52(3) . ? 
C30 C35 1.511(12) . ? 
C30 C31 1.523(13) . ? 
C31 C32 1.496(13) . ? 
C32 C33 1.514(14) . ? 
C33 C34 1.480(15) . ? 
C34 C35 1.504(13) . ? 
C36 C41 1.440(13) . ? 
C36 C37 1.484(13) . ? 
C37 C38 1.522(15) . ? 
C38 C39 1.482(17) . ? 
C39 C40 1.473(14) . ? 
C40 C41 1.542(13) . ? 
C42 C46 1.35(2) . ? 
C42 C43 1.42(2) . ? 
C43 C44 1.38(2) . ? 
C44 C45 1.31(2) . ? 
C45 C46 1.34(2) . ? 
C47 C51 1.350(17) . ? 
C47 C48 1.43(2) . ? 
C48 C49 1.31(2) . ? 
C49 C50 1.33(3) . ? 
C50 C51 1.39(3) . ? 
O1 C52 1.368(12) . ? 
O1 C55 1.453(12) . ? 
C52 C53 1.433(15) . ? 
C53 C54 1.381(15) . ? 
C54 C55 1.419(14) . ? 
  
loop_ 
 _geom_angle_atom_site_label_1 
 _geom_angle_atom_site_label_2 
 _geom_angle_atom_site_label_3 
 _geom_angle 
 _geom_angle_site_symmetry_1 
 _geom_angle_site_symmetry_3 
 _geom_angle_publ_flag 
N1 Yb1 N5 55.8(2) . . ? 
N1 Yb1 O1 138.5(2) . . ? 
N5 Yb1 O1 82.8(2) . . ? 
N1 Yb1 C10 77.3(3) . . ? 
N5 Yb1 C10 111.5(3) . . ? 
O1 Yb1 C10 125.8(3) . . ? 
N1 Yb1 C3 124.6(4) . . ? 
N5 Yb1 C3 132.0(5) . . ? 
O1 Yb1 C3 80.0(5) . . ? 
C10 Yb1 C3 115.0(6) . . ? 
N1 Yb1 C8 126.7(3) . . ? 
N5 Yb1 C8 126.2(4) . . ? 
O1 Yb1 C8 77.5(3) . . ? 
C10 Yb1 C8 51.4(4) . . ? 
C3 Yb1 C8 93.0(5) . . ? 
N1 Yb1 C4 99.1(5) . . ? 
N5 Yb1 C4 137.4(4) . . ? 
O1 Yb1 C4 112.1(5) . . ? 
C10 Yb1 C4 92.2(4) . . ? 
C3 Yb1 C4 32.2(4) . . ? 
C8 Yb1 C4 96.3(5) . . ? 
N1 Yb1 C9 105.3(4) . . ? 
N5 Yb1 C9 138.5(4) . . ? 
O1 Yb1 C9 107.8(4) . . ? 
C10 Yb1 C9 30.2(3) . . ? 
C3 Yb1 C9 89.5(6) . . ? 
C8 Yb1 C9 31.7(3) . . ? 
C4 Yb1 C9 76.8(4) . . ? 
N1 Yb1 C6 78.7(3) . . ? 
N5 Yb1 C6 88.8(3) . . ? 
O1 Yb1 C6 104.8(3) . . ? 
C10 Yb1 C6 30.4(3) . . ? 
C3 Yb1 C6 138.9(6) . . ? 
C8 Yb1 C6 50.4(4) . . ? 
C4 Yb1 C6 122.2(4) . . ? 
C9 Yb1 C6 49.8(4) . . ? 
N1 Yb1 C7 106.8(4) . . ? 
N5 Yb1 C7 96.4(3) . . ? 
O1 Yb1 C7 77.1(3) . . ? 
C10 Yb1 C7 50.3(4) . . ? 
C3 Yb1 C7 122.4(5) . . ? 
C8 Yb1 C7 30.6(3) . . ? 
C4 Yb1 C7 125.3(4) . . ? 
C9 Yb1 C7 50.4(4) . . ? 
C6 Yb1 C7 29.9(3) . . ? 
N1 Yb1 C2 109.6(5) . . ? 
N5 Yb1 C2 102.2(5) . . ? 
O1 Yb1 C2 74.5(4) . . ? 
C10 Yb1 C2 141.9(5) . . ? 
C3 Yb1 C2 29.9(4) . . ? 
C8 Yb1 C2 119.2(6) . . ? 
C4 Yb1 C2 50.1(5) . . ? 
C9 Yb1 C2 119.3(6) . . ? 
C6 Yb1 C2 168.7(6) . . ? 
C7 Yb1 C2 143.5(6) . . ? 
N1 Yb1 C1 81.0(4) . . ? 
N5 Yb1 C1 90.7(3) . . ? 
O1 Yb1 C1 99.3(5) . . ? 
C10 Yb1 C1 130.7(5) . . ? 
C3 Yb1 C1 49.1(5) . . ? 
C8 Yb1 C1 141.4(4) . . ? 
C4 Yb1 C1 48.6(4) . . ? 
C9 Yb1 C1 125.1(4) . . ? 
C6 Yb1 C1 155.6(5) . . ? 
C7 Yb1 C1 171.5(5) . . ? 
C2 Yb1 C1 29.1(4) . . ? 
N6 Yb2 N7 58.9(2) . . ? 
N6 Yb2 C48 107.1(6) . . ? 
N7 Yb2 C48 132.0(5) . . ? 
N6 Yb2 C49 134.4(6) . . ? 
N7 Yb2 C49 129.3(7) . . ? 
C48 Yb2 C49 29.3(5) . . ? 
N6 Yb2 C42 85.4(4) . . ? 
N7 Yb2 C42 96.9(5) . . ? 
C48 Yb2 C42 129.5(7) . . ? 
C49 Yb2 C42 128.5(7) . . ? 
N6 Yb2 C47 86.1(4) . . ? 
N7 Yb2 C47 100.4(5) . . ? 
C48 Yb2 C47 32.1(4) . . ? 
C49 Yb2 C47 49.5(6) . . ? 
C42 Yb2 C47 153.2(8) . . ? 
N6 Yb2 C44 128.3(7) . . ? 
N7 Yb2 C44 138.3(6) . . ? 
C48 Yb2 C44 88.1(7) . . ? 
C49 Yb2 C44 78.2(7) . . ? 
C42 Yb2 C44 50.4(5) . . ? 
C47 Yb2 C44 120.2(6) . . ? 
N6 Yb2 C46 107.2(6) . . ? 
N7 Yb2 C46 90.7(4) . . ? 
C48 Yb2 C46 135.2(6) . . ? 
C49 Yb2 C46 116.6(8) . . ? 
C42 Yb2 C46 29.9(4) . . ? 
C47 Yb2 C46 166.0(6) . . ? 
C44 Yb2 C46 47.8(5) . . ? 
N6 Yb2 C51 99.4(4) . . ? 
N7 Yb2 C51 84.5(4) . . ? 
C48 Yb2 C51 50.5(5) . . ? 
C49 Yb2 C51 48.4(6) . . ? 
C42 Yb2 C51 175.0(6) . . ? 
C47 Yb2 C51 29.9(4) . . ? 
C44 Yb2 C51 126.0(5) . . ? 
C46 Yb2 C51 145.5(8) . . ? 
N6 Yb2 C50 130.2(7) . . ? 
N7 Yb2 C50 100.3(5) . . ? 
C48 Yb2 C50 50.8(7) . . ? 
C49 Yb2 C50 29.6(6) . . ? 
C42 Yb2 C50 144.3(7) . . ? 
C47 Yb2 C50 51.1(7) . . ? 
C44 Yb2 C50 98.0(8) . . ? 
C46 Yb2 C50 118.6(9) . . ? 
C51 Yb2 C50 30.8(6) . . ? 
N6 Yb2 C43 97.9(7) . . ? 
N7 Yb2 C43 127.7(7) . . ? 
C48 Yb2 C43 98.3(7) . . ? 
C49 Yb2 C43 101.0(10) . . ? 
C42 Yb2 C43 31.3(4) . . ? 
C47 Yb2 C43 126.0(7) . . ? 
C44 Yb2 C43 30.4(5) . . ? 
C46 Yb2 C43 49.1(5) . . ? 
C51 Yb2 C43 147.8(7) . . ? 
C50 Yb2 C43 126.2(9) . . ? 
N6 Yb2 C45 135.0(6) . . ? 
N7 Yb2 C45 112.4(7) . . ? 
C48 Yb2 C45 107.7(9) . . ? 
C49 Yb2 C45 87.2(9) . . ? 
C42 Yb2 C45 50.3(5) . . ? 
C47 Yb2 C45 136.6(7) . . ? 
C44 Yb2 C45 28.8(5) . . ? 
C46 Yb2 C45 29.4(5) . . ? 
C51 Yb2 C45 124.7(7) . . ? 
C50 Yb2 C45 94.1(9) . . ? 
C43 Yb2 C45 49.5(6) . . ? 
C15 N1 C11 118.9(7) . . ? 
C15 N1 Yb1 144.4(6) . . ? 
C11 N1 Yb1 96.8(5) . . ? 
C16 N2 C15 121.4(8) . . ? 
C16 N3 C17 128.9(9) . . ? 
C16 N4 C23 123.0(9) . . ? 
C11 N5 C29 115.0(7) . . ? 
C11 N5 Yb1 96.8(5) . . ? 
C29 N5 Yb1 148.2(5) . . ? 
C29 N6 C30 120.1(8) . . ? 
C29 N6 Yb2 95.0(6) . . ? 
C30 N6 Yb2 144.8(5) . . ? 
C29 N7 C36 120.3(7) . . ? 
C29 N7 Yb2 94.3(5) . . ? 
C36 N7 Yb2 145.1(6) . . ? 
C5 C1 C2 111.4(16) . . ? 
C5 C1 Yb1 76.1(8) . . ? 
C2 C1 Yb1 75.0(8) . . ? 
C1 C2 C3 109.4(16) . . ? 
C1 C2 Yb1 75.9(8) . . ? 
C3 C2 Yb1 74.3(8) . . ? 
C2 C3 C4 104.7(13) . . ? 
C2 C3 Yb1 75.9(7) . . ? 
C4 C3 Yb1 74.1(7) . . ? 
C5 C4 C3 106.0(13) . . ? 
C5 C4 Yb1 76.3(7) . . ? 
C3 C4 Yb1 73.7(6) . . ? 
C1 C5 C4 108.4(15) . . ? 
C1 C5 Yb1 75.4(8) . . ? 
C4 C5 Yb1 73.6(7) . . ? 
C7 C6 C10 109.2(12) . . ? 
C7 C6 Yb1 75.3(7) . . ? 
C10 C6 Yb1 73.4(7) . . ? 
C6 C7 C8 109.0(12) . . ? 
C6 C7 Yb1 74.8(7) . . ? 
C8 C7 Yb1 74.1(6) . . ? 
C7 C8 C9 105.4(12) . . ? 
C7 C8 Yb1 75.3(6) . . ? 
C9 C8 Yb1 74.5(6) . . ? 
C10 C9 C8 107.9(12) . . ? 
C10 C9 Yb1 73.5(7) . . ? 
C8 C9 Yb1 73.8(7) . . ? 
C9 C10 C6 108.3(12) . . ? 
C9 C10 Yb1 76.3(8) . . ? 
C6 C10 Yb1 76.3(7) . . ? 
N5 C11 N1 110.7(7) . . ? 
N5 C11 C12 128.5(8) . . ? 
N1 C11 C12 120.9(8) . . ? 
N5 C11 Yb1 55.6(4) . . ? 
N1 C11 Yb1 55.1(4) . . ? 
C12 C11 Yb1 175.6(7) . . ? 
C13 C12 C11 118.9(9) . . ? 
C12 C13 C14 121.2(9) . . ? 
C13 C14 C15 119.4(9) . . ? 
N1 C15 C14 120.6(9) . . ? 
N1 C15 N2 113.7(8) . . ? 
C14 C15 N2 125.5(8) . . ? 
N2 C16 N3 127.5(9) . . ? 
N2 C16 N4 117.6(10) . . ? 
N3 C16 N4 114.9(9) . . ? 
N3 C17 C18 108.4(9) . . ? 
N3 C17 C22 109.9(10) . . ? 
C18 C17 C22 108.3(10) . . ? 
C19 C18 C17 108.5(10) . . ? 
C20 C19 C18 113.8(14) . . ? 
C19 C20 C21 110.5(14) . . ? 
C22 C21 C20 111.5(14) . . ? 
C21 C22 C17 113.8(12) . . ? 
C28 C23 C24' 101(2) . . ? 
C28 C23 N4 125(2) . . ? 
C24' C23 N4 131(3) . . ? 
C28 C23 C24 122(2) . . ? 
C24' C23 C24 56.0(17) . . ? 
N4 C23 C24 104.2(14) . . ? 
C28 C23 C28' 64.5(19) . . ? 
C24' C23 C28' 108.1(18) . . ? 
N4 C23 C28' 106.4(12) . . ? 
C24 C23 C28' 73.6(11) . . ? 
C25' C26 C27' 109.3(19) . . ? 
C25' C26 C25 65(2) . . ? 
C27' C26 C25 112.6(18) . . ? 
C25' C26 C27 50.6(18) . . ? 
C27' C26 C27 64(2) . . ? 
C25 C26 C27 103.1(18) . . ? 
C25 C24 C23 111.4(18) . . ? 
C24 C25 C26 115.1(18) . . ? 
C28 C27 C26 119(2) . . ? 
C23 C28 C27 116(3) . . ? 
C23 C24' C25' 121(2) . . ? 
C26 C25' C24' 112(2) . . ? 
C26 C27' C28' 113.6(18) . . ? 
C27' C28' C23 111.0(15) . . ? 
N7 C29 N6 111.7(8) . . ? 
N7 C29 N5 125.4(8) . . ? 
N6 C29 N5 122.9(9) . . ? 
N7 C29 Yb2 56.4(4) . . ? 
N6 C29 Yb2 55.3(5) . . ? 
N5 C29 Yb2 177.1(6) . . ? 
N6 C30 C35 110.9(8) . . ? 
N6 C30 C31 112.3(8) . . ? 
C35 C30 C31 108.6(8) . . ? 
C32 C31 C30 111.9(10) . . ? 
C31 C32 C33 113.3(11) . . ? 
C34 C33 C32 108.8(10) . . ? 
C33 C34 C35 112.9(11) . . ? 
C34 C35 C30 113.1(9) . . ? 
C41 C36 C37 108.8(10) . . ? 
C41 C36 N7 112.3(9) . . ? 
C37 C36 N7 109.0(8) . . ? 
C36 C37 C38 110.7(11) . . ? 
C39 C38 C37 112.7(12) . . ? 
C40 C39 C38 109.5(11) . . ? 
C39 C40 C41 110.1(11) . . ? 
C36 C41 C40 113.4(10) . . ? 
C46 C42 C43 104.6(17) . . ? 
C46 C42 Yb2 75.7(10) . . ? 
C43 C42 Yb2 76.1(8) . . ? 
C44 C43 C42 105.1(16) . . ? 
C44 C43 Yb2 73.3(8) . . ? 
C42 C43 Yb2 72.6(7) . . ? 
C45 C44 C43 112(2) . . ? 
C45 C44 Yb2 78.1(11) . . ? 
C43 C44 Yb2 76.4(8) . . ? 
C44 C45 C46 105.6(19) . . ? 
C44 C45 Yb2 73.1(10) . . ? 
C46 C45 Yb2 73.2(10) . . ? 
C45 C46 C42 112.7(18) . . ? 
C45 C46 Yb2 77.4(11) . . ? 
C42 C46 Yb2 74.4(10) . . ? 
C51 C47 C48 105.4(15) . . ? 
C51 C47 Yb2 75.4(9) . . ? 
C48 C47 Yb2 72.3(8) . . ? 
C49 C48 C47 105(2) . . ? 
C49 C48 Yb2 76.6(13) . . ? 
C47 C48 Yb2 75.6(7) . . ? 
C48 C49 C50 115(3) . . ? 
C48 C49 Yb2 74.1(12) . . ? 
C50 C49 Yb2 76.4(13) . . ? 
C49 C50 C51 103(2) . . ? 
C49 C50 Yb2 74.0(13) . . ? 
C51 C50 Yb2 74.3(9) . . ? 
C47 C51 C50 110.9(16) . . ? 
C47 C51 Yb2 74.7(9) . . ? 
C50 C51 Yb2 74.9(10) . . ? 
C52 O1 C55 105.8(8) . . ? 
C52 O1 Yb1 126.7(6) . . ? 
C55 O1 Yb1 126.1(7) . . ? 
O1 C52 C53 108.5(10) . . ? 
C54 C53 C52 110.4(12) . . ? 
C53 C54 C55 105.1(11) . . ? 
C54 C55 O1 110.0(10) . . ? 
  
_diffrn_measured_fraction_theta_max    0.998 
_diffrn_reflns_theta_full              26.01 
_diffrn_measured_fraction_theta_full   0.998 
_refine_diff_density_max    1.379 
_refine_diff_density_min   -1.340 
_refine_diff_density_rms    0.156 
  
#==================END

  
data_f51226a 
  
_audit_creation_method            SHELXL-97 
_chemical_name_systematic 
; 
 ? 
; 
_chemical_name_common             ? 
_chemical_melting_point           ? 
_chemical_formula_moiety          ? 
_chemical_formula_sum 
 'C60 H86 N6 O2 Yb2' 
_chemical_formula_weight          1269.43 
  
loop_ 
 _atom_type_symbol 
 _atom_type_description 
 _atom_type_scat_dispersion_real 
 _atom_type_scat_dispersion_imag 
 _atom_type_scat_source 
 'C'  'C'   0.0033   0.0016 
 'International Tables Vol C Tables 4.2.6.8 and 6.1.1.4' 
 'H'  'H'   0.0000   0.0000 
 'International Tables Vol C Tables 4.2.6.8 and 6.1.1.4' 
 'N'  'N'   0.0061   0.0033 
 'International Tables Vol C Tables 4.2.6.8 and 6.1.1.4' 
 'O'  'O'   0.0106   0.0060 
 'International Tables Vol C Tables 4.2.6.8 and 6.1.1.4' 
 'Yb'  'Yb'  -0.3850   5.5486 
 'International Tables Vol C Tables 4.2.6.8 and 6.1.1.4' 
  
_symmetry_cell_setting            Tetragonal 
_symmetry_space_group_name_H-M    I4(1)/a 
  
loop_ 
 _symmetry_equiv_pos_as_xyz 
 'x, y, z' 
 '-x+1/2, -y, z+1/2' 
 '-y+3/4, x+1/4, z+1/4' 
 'y+3/4, -x+3/4, z+3/4' 
 'x+1/2, y+1/2, z+1/2' 
 '-x+1, -y+1/2, z+1' 
 '-y+5/4, x+3/4, z+3/4' 
 'y+5/4, -x+5/4, z+5/4' 
 '-x, -y, -z' 
 'x-1/2, y, -z-1/2' 
 'y-3/4, -x-1/4, -z-1/4' 
 '-y-3/4, x-3/4, -z-3/4' 
 '-x+1/2, -y+1/2, -z+1/2' 
 'x, y+1/2, -z' 
 'y-1/4, -x+1/4, -z+1/4' 
 '-y-1/4, x-1/4, -z-1/4' 
  
_cell_length_a                    28.357(8) 
_cell_length_b                    28.357(8) 
_cell_length_c                    14.586(6) 
_cell_angle_alpha                 90.00 
_cell_angle_beta                  90.00 
_cell_angle_gamma                 90.00 
_cell_volume                      11729(6) 
_cell_formula_units_Z             8 
_cell_measurement_temperature     293(2) 
_cell_measurement_reflns_used     988 
_cell_measurement_theta_min       3.275 
_cell_measurement_theta_max       20.519 
  
_exptl_crystal_description        ? 
_exptl_crystal_colour             ? 
_exptl_crystal_size_max           0.15 
_exptl_crystal_size_mid           0.10 
_exptl_crystal_size_min           0.10 
_exptl_crystal_density_meas       ? 
_exptl_crystal_density_diffrn     1.438 
_exptl_crystal_density_method     'not measured' 
_exptl_crystal_F_000              5152 
_exptl_absorpt_coefficient_mu     3.214 
_exptl_absorpt_correction_type    multi-scan 
_exptl_absorpt_correction_T_min   0.6442 
_exptl_absorpt_correction_T_max   0.7393 
_exptl_absorpt_process_details    sadabs 
  
_exptl_special_details 
; 
 ? 
; 
  
_diffrn_ambient_temperature       293(2) 
_diffrn_radiation_wavelength      0.71073 
_diffrn_radiation_type            MoK\a 
_diffrn_radiation_source          'fine-focus sealed tube' 
_diffrn_radiation_monochromator   graphite 
_diffrn_measurement_device_type   'CCD area detector' 
_diffrn_measurement_method        'phi and omega scans' 
_diffrn_detector_area_resol_mean  ? 
_diffrn_standards_number          ? 
_diffrn_standards_interval_count  ? 
_diffrn_standards_interval_time   ? 
_diffrn_standards_decay_%         7.28 
_diffrn_reflns_number             24154 
_diffrn_reflns_av_R_equivalents   0.0620 
_diffrn_reflns_av_sigmaI/netI     0.0564 
_diffrn_reflns_limit_h_min        -33 
_diffrn_reflns_limit_h_max        25 
_diffrn_reflns_limit_k_min        -32 
_diffrn_reflns_limit_k_max        33 
_diffrn_reflns_limit_l_min        -17 
_diffrn_reflns_limit_l_max        17 
_diffrn_reflns_theta_min          1.44 
_diffrn_reflns_theta_max          25.00 
_reflns_number_total              5166 
_reflns_number_gt                 3520 
_reflns_threshold_expression      >2sigma(I) 
  
_computing_data_collection        'Bruker SMART' 
_computing_cell_refinement        'Bruker SMART' 
_computing_data_reduction         'Bruker SHELXTL' 
_computing_structure_solution     'SHELXS-97 (Sheldrick, 1990)' 
_computing_structure_refinement   'SHELXL-97 (Sheldrick, 1997)' 
_computing_molecular_graphics     'Bruker SHELXTL' 
_computing_publication_material   'Bruker SHELXTL' 
  
_refine_special_details 
; 
 Refinement of F^2^ against ALL reflections.  The weighted R-factor wR and 
 goodness of fit S are based on F^2^, conventional R-factors R are based 
 on F, with F set to zero for negative F^2^. The threshold expression of 
 F^2^ > 2sigma(F^2^) is used only for calculating R-factors(gt) etc. and is 
 not relevant to the choice of reflections for refinement.  R-factors based 
 on F^2^ are statistically about twice as large as those based on F, and R- 
 factors based on ALL data will be even larger. 
; 
  
_refine_ls_structure_factor_coef  Fsqd 
_refine_ls_matrix_type            full 
_refine_ls_weighting_scheme       calc 
_refine_ls_weighting_details 
 'calc w=1/[\s^2^(Fo^2^)+(0.0264P)^2^+160.7832P] where P=(Fo^2^+2Fc^2^)/3' 
_atom_sites_solution_primary      direct 
_atom_sites_solution_secondary    difmap 
_atom_sites_solution_hydrogens    geom 
_refine_ls_hydrogen_treatment     constr 
_refine_ls_extinction_method      none 
_refine_ls_extinction_coef        ? 
_refine_ls_number_reflns          5166 
_refine_ls_number_parameters      316 
_refine_ls_number_restraints      10 
_refine_ls_R_factor_all           0.1041 
_refine_ls_R_factor_gt            0.0708 
_refine_ls_wR_factor_ref          0.1544 
_refine_ls_wR_factor_gt           0.1451 
_refine_ls_goodness_of_fit_ref    1.262 
_refine_ls_restrained_S_all       1.268 
_refine_ls_shift/su_max           0.005 
_refine_ls_shift/su_mean          0.000 
  
loop_ 
 _atom_site_label 
 _atom_site_type_symbol 
 _atom_site_fract_x 
 _atom_site_fract_y 
 _atom_site_fract_z 
 _atom_site_U_iso_or_equiv 
 _atom_site_adp_type 
 _atom_site_occupancy 
 _atom_site_symmetry_multiplicity 
 _atom_site_calc_flag 
 _atom_site_refinement_flags 
 _atom_site_disorder_assembly 
 _atom_site_disorder_group 
Yb1 Yb 0.84717(2) 0.784418(19) 1.00986(3) 0.0614(2) Uani 1 1 d . . . 
N1 N 0.7742(3) 0.7681(3) 1.0652(6) 0.055(2) Uani 1 1 d . . . 
N2 N 0.7815(3) 0.8217(3) 0.9537(6) 0.062(3) Uani 1 1 d . . . 
N3 N 0.7044(3) 0.8031(3) 1.0046(6) 0.065(3) Uani 1 1 d . . . 
H3 H 0.6925 0.8305 0.9939 0.078 Uiso 1 1 calc R . . 
C1 C 0.8566(8) 0.8495(17) 1.131(3) 0.22(3) Uani 1 1 d . . . 
H1 H 0.8302 0.8679 1.1433 0.264 Uiso 1 1 calc R . . 
C2 C 0.8872(14) 0.8595(6) 1.068(2) 0.175(18) Uani 1 1 d . . . 
H2 H 0.8854 0.8849 1.0277 0.210 Uiso 1 1 calc R . . 
C3 C 0.9201(9) 0.8290(13) 1.0692(13) 0.140(11) Uani 1 1 d . . . 
H3A H 0.9461 0.8280 1.0306 0.168 Uiso 1 1 calc R . . 
C4 C 0.9098(9) 0.7971(9) 1.139(2) 0.145(13) Uani 1 1 d . . . 
H4 H 0.9277 0.7715 1.1588 0.173 Uiso 1 1 calc R . . 
C5 C 0.8662(15) 0.8126(12) 1.1743(17) 0.21(3) Uani 1 1 d . . . 
H5 H 0.8483 0.7984 1.2200 0.256 Uiso 1 1 calc R . . 
C6 C 0.8461(8) 0.6975(5) 0.9465(13) 0.102(6) Uani 1 1 d . . . 
H6 H 0.8256 0.6758 0.9728 0.122 Uiso 1 1 calc R . . 
C7 C 0.8370(7) 0.7260(7) 0.8724(12) 0.102(5) Uani 1 1 d . . . 
H7 H 0.8087 0.7274 0.8402 0.122 Uiso 1 1 calc R . . 
C8 C 0.8763(9) 0.7519(7) 0.8538(13) 0.115(6) Uani 1 1 d . . . 
H8 H 0.8789 0.7739 0.8068 0.139 Uiso 1 1 calc R . . 
C9 C 0.9117(8) 0.7406(8) 0.9151(19) 0.127(7) Uani 1 1 d . . . 
H9 H 0.9422 0.7526 0.9167 0.153 Uiso 1 1 calc R . . 
C10 C 0.8916(10) 0.7073(7) 0.9745(13) 0.115(6) Uani 1 1 d . . . 
H10 H 0.9065 0.6939 1.0249 0.138 Uiso 1 1 calc R . . 
C11 C 0.7520(4) 0.7981(4) 1.0078(7) 0.059(3) Uani 1 1 d . . . 
C12 C 0.7596(4) 0.7598(4) 1.1565(7) 0.049(3) Uani 1 1 d . . . 
C13 C 0.7322(4) 0.7894(4) 1.2078(7) 0.060(3) Uani 1 1 d . . . 
H13 H 0.7197 0.8165 1.1811 0.072 Uiso 1 1 calc R . . 
C14 C 0.7229(4) 0.7795(4) 1.2999(8) 0.062(3) Uani 1 1 d . . . 
H14 H 0.7041 0.8003 1.3330 0.075 Uiso 1 1 calc R . . 
C15 C 0.7655(5) 0.8531(5) 0.8792(8) 0.068(4) Uani 1 1 d . . . 
H15 H 0.7335 0.8637 0.8940 0.082 Uiso 1 1 calc R . . 
C16 C 0.7642(7) 0.8309(5) 0.7902(9) 0.117(6) Uani 1 1 d . . . 
H16A H 0.7417 0.8052 0.7918 0.141 Uiso 1 1 calc R . . 
H16B H 0.7950 0.8176 0.7772 0.141 Uiso 1 1 calc R . . 
C17 C 0.7506(8) 0.8647(6) 0.7117(10) 0.134(7) Uani 1 1 d . . . 
H17A H 0.7521 0.8482 0.6535 0.161 Uiso 1 1 calc R . . 
H17B H 0.7186 0.8759 0.7205 0.161 Uiso 1 1 calc R . . 
C18 C 0.7834(7) 0.9050(7) 0.7108(11) 0.127(7) Uani 1 1 d . . . 
H18A H 0.8146 0.8938 0.6941 0.152 Uiso 1 1 calc R . . 
H18B H 0.7734 0.9272 0.6642 0.152 Uiso 1 1 calc R . . 
C19 C 0.7862(8) 0.9288(6) 0.7969(13) 0.137(8) Uani 1 1 d . . . 
H19A H 0.7567 0.9450 0.8084 0.165 Uiso 1 1 calc R . . 
H19B H 0.8110 0.9524 0.7939 0.165 Uiso 1 1 calc R . . 
C20 C 0.7964(8) 0.8953(5) 0.8763(11) 0.142(8) Uani 1 1 d . . . 
H20A H 0.8289 0.8850 0.8721 0.170 Uiso 1 1 calc R . . 
H20B H 0.7929 0.9125 0.9334 0.170 Uiso 1 1 calc R . . 
C21 C 0.6721(4) 0.7622(5) 1.0194(8) 0.069(3) Uani 1 1 d . . . 
H21 H 0.6866 0.7408 1.0641 0.083 Uiso 1 1 calc R . . 
C22 C 0.6657(6) 0.7357(6) 0.9291(10) 0.094(5) Uani 1 1 d . . . 
H22A H 0.6541 0.7572 0.8826 0.113 Uiso 1 1 calc R . . 
H22B H 0.6958 0.7234 0.9088 0.113 Uiso 1 1 calc R . . 
C23 C 0.6314(7) 0.6959(6) 0.9406(13) 0.118(6) Uani 1 1 d . . . 
H23A H 0.6449 0.6724 0.9813 0.142 Uiso 1 1 calc R . . 
H23B H 0.6261 0.6810 0.8816 0.142 Uiso 1 1 calc R . . 
C24 C 0.5850(6) 0.7122(6) 0.9792(12) 0.109(6) Uani 1 1 d . . . 
H24A H 0.5648 0.6851 0.9898 0.131 Uiso 1 1 calc R . . 
H24B H 0.5694 0.7326 0.9351 0.131 Uiso 1 1 calc R . . 
C25 C 0.5920(6) 0.7388(6) 1.0687(12) 0.113(6) Uani 1 1 d . . . 
H25A H 0.6037 0.7173 1.1151 0.136 Uiso 1 1 calc R . . 
H25B H 0.5618 0.7510 1.0895 0.136 Uiso 1 1 calc R . . 
C26 C 0.6267(5) 0.7796(5) 1.0573(10) 0.086(4) Uani 1 1 d . . . 
H26A H 0.6134 0.8031 1.0164 0.103 Uiso 1 1 calc R . . 
H26B H 0.6322 0.7945 1.1163 0.103 Uiso 1 1 calc R . . 
O1 O 0.7914(11) 0.8982(11) 0.434(2) 0.39(2) Uani 1 1 d D . . 
C27 C 0.7689(10) 0.8990(10) 0.342(2) 0.30(3) Uani 1 1 d D . . 
H27A H 0.7804 0.8737 0.3036 0.359 Uiso 1 1 calc R . . 
H27B H 0.7349 0.8972 0.3465 0.359 Uiso 1 1 calc R . . 
C28 C 0.7848(11) 0.9456(11) 0.3092(19) 0.247(17) Uani 1 1 d D . . 
H28A H 0.7924 0.9442 0.2444 0.297 Uiso 1 1 calc R . . 
H28B H 0.7603 0.9690 0.3182 0.297 Uiso 1 1 calc R . . 
C29 C 0.8266(11) 0.9575(9) 0.363(3) 0.265(18) Uani 1 1 d D . . 
H29A H 0.8193 0.9797 0.4113 0.318 Uiso 1 1 calc R . . 
H29B H 0.8514 0.9704 0.3243 0.318 Uiso 1 1 calc R . . 
C30 C 0.8396(7) 0.9105(12) 0.400(3) 0.34(3) Uani 1 1 d D . . 
H30A H 0.8627 0.9125 0.4486 0.410 Uiso 1 1 calc R . . 
H30B H 0.8506 0.8890 0.3524 0.410 Uiso 1 1 calc R . . 
  
loop_ 
 _atom_site_aniso_label 
 _atom_site_aniso_U_11 
 _atom_site_aniso_U_22 
 _atom_site_aniso_U_33 
 _atom_site_aniso_U_23 
 _atom_site_aniso_U_13 
 _atom_site_aniso_U_12 
Yb1 0.0752(4) 0.0672(4) 0.0417(3) -0.0025(2) 0.0050(3) -0.0003(3) 
N1 0.070(6) 0.057(6) 0.038(5) 0.012(4) 0.004(4) 0.001(5) 
N2 0.064(6) 0.075(7) 0.047(5) 0.021(5) 0.005(5) 0.013(5) 
N3 0.071(7) 0.061(6) 0.063(6) 0.016(5) 0.007(5) -0.003(5) 
C1 0.092(15) 0.36(6) 0.21(3) -0.25(4) 0.039(19) -0.05(2) 
C2 0.28(4) 0.039(9) 0.21(3) -0.013(13) -0.17(3) 0.019(15) 
C3 0.15(2) 0.21(3) 0.065(11) -0.039(13) 0.040(12) -0.11(2) 
C4 0.104(16) 0.094(15) 0.24(4) -0.043(18) -0.10(2) 0.014(14) 
C5 0.32(5) 0.21(3) 0.107(17) 0.09(2) -0.13(3) -0.23(4) 
C6 0.149(19) 0.055(10) 0.102(14) -0.020(9) 0.032(12) -0.003(11) 
C7 0.124(16) 0.101(13) 0.081(12) -0.031(10) -0.006(11) -0.009(12) 
C8 0.141(18) 0.125(17) 0.081(13) -0.028(11) 0.040(13) 0.011(16) 
C9 0.112(16) 0.120(17) 0.15(2) -0.072(15) 0.051(16) -0.005(14) 
C10 0.157(19) 0.094(14) 0.096(14) -0.011(11) 0.014(15) 0.046(14) 
C11 0.073(8) 0.064(8) 0.040(6) -0.005(6) 0.003(6) -0.005(6) 
C12 0.056(7) 0.045(7) 0.045(6) 0.011(5) 0.003(5) -0.007(6) 
C13 0.083(9) 0.050(7) 0.046(6) 0.008(5) -0.002(6) 0.007(7) 
C14 0.078(9) 0.061(8) 0.049(7) 0.000(6) 0.013(6) 0.007(7) 
C15 0.074(9) 0.081(9) 0.050(7) 0.025(6) 0.004(6) -0.005(7) 
C16 0.197(19) 0.096(12) 0.059(9) 0.019(8) -0.038(10) -0.004(12) 
C17 0.22(2) 0.120(15) 0.065(10) 0.030(10) -0.028(12) -0.029(15) 
C18 0.161(18) 0.146(17) 0.074(11) 0.053(11) -0.016(11) -0.052(15) 
C19 0.22(2) 0.079(12) 0.113(15) 0.032(11) -0.043(15) -0.037(13) 
C20 0.27(3) 0.077(11) 0.082(11) 0.019(9) -0.062(14) -0.041(14) 
C21 0.068(8) 0.093(10) 0.046(7) 0.014(6) -0.007(6) 0.002(7) 
C22 0.098(12) 0.101(12) 0.083(10) -0.019(9) -0.005(9) 0.002(10) 
C23 0.129(17) 0.112(15) 0.115(14) 0.002(11) -0.022(12) -0.005(13) 
C24 0.090(12) 0.100(12) 0.138(15) 0.009(11) -0.039(11) -0.040(10) 
C25 0.104(13) 0.115(14) 0.121(14) -0.013(11) 0.029(11) -0.040(11) 
C26 0.074(10) 0.104(12) 0.081(10) -0.001(8) 0.006(8) -0.010(9) 
O1 0.24(3) 0.58(7) 0.34(4) 0.10(4) -0.01(3) 0.04(4) 
C27 0.41(7) 0.15(3) 0.34(6) -0.08(3) 0.06(5) -0.12(4) 
C28 0.21(3) 0.21(4) 0.32(4) 0.03(3) -0.13(3) 0.02(3) 
C29 0.23(4) 0.24(4) 0.33(5) 0.11(4) -0.03(3) -0.04(3) 
C30 0.13(3) 0.28(5) 0.62(9) 0.13(5) 0.00(4) -0.05(3) 
  
_geom_special_details 
; 
 All esds (except the esd in the dihedral angle between two l.s. planes) 
 are estimated using the full covariance matrix.  The cell esds are taken 
 into account individually in the estimation of esds in distances, angles 
 and torsion angles; correlations between esds in cell parameters are only 
 used when they are defined by crystal symmetry.  An approximate (isotropic) 
 treatment of cell esds is used for estimating esds involving l.s. planes. 
; 
  
loop_ 
 _geom_bond_atom_site_label_1 
 _geom_bond_atom_site_label_2 
 _geom_bond_distance 
 _geom_bond_site_symmetry_2 
 _geom_bond_publ_flag 
Yb1 N1 2.268(9) . ? 
Yb1 N2 2.293(9) . ? 
Yb1 C2 2.556(18) . ? 
Yb1 C1 2.570(19) . ? 
Yb1 C3 2.573(18) . ? 
Yb1 C10 2.576(16) . ? 
Yb1 C5 2.59(2) . ? 
Yb1 C8 2.591(15) . ? 
Yb1 C9 2.607(16) . ? 
Yb1 C7 2.617(14) . ? 
Yb1 C4 2.620(19) . ? 
Yb1 C6 2.632(14) . ? 
N1 C11 1.348(13) . ? 
N1 C12 1.415(12) . ? 
N2 C11 1.332(13) . ? 
N2 C15 1.476(13) . ? 
N3 C11 1.359(14) . ? 
N3 C21 1.492(15) . ? 
N3 H3 0.8600 . ? 
C1 C5 1.25(5) . ? 
C1 C2 1.30(4) . ? 
C1 H1 0.9300 . ? 
C2 C3 1.27(3) . ? 
C2 H2 0.9300 . ? 
C3 C4 1.40(3) . ? 
C3 H3A 0.9300 . ? 
C4 C5 1.41(4) . ? 
C4 H4 0.9300 . ? 
C5 H5 0.9300 . ? 
C6 C7 1.37(2) . ? 
C6 C10 1.38(2) . ? 
C6 H6 0.9300 . ? 
C7 C8 1.36(2) . ? 
C7 H7 0.9300 . ? 
C8 C9 1.38(3) . ? 
C8 H8 0.9300 . ? 
C9 C10 1.40(2) . ? 
C9 H9 0.9300 . ? 
C10 H10 0.9300 . ? 
C12 C13 1.366(14) . ? 
C12 C14 1.377(14) 13_667 ? 
C13 C14 1.398(14) . ? 
C13 H13 0.9300 . ? 
C14 C12 1.377(14) 13_667 ? 
C14 H14 0.9300 . ? 
C15 C16 1.444(17) . ? 
C15 C20 1.484(18) . ? 
C15 H15 0.9800 . ? 
C16 C17 1.541(18) . ? 
C16 H16A 0.9700 . ? 
C16 H16B 0.9700 . ? 
C17 C18 1.47(2) . ? 
C17 H17A 0.9700 . ? 
C17 H17B 0.9700 . ? 
C18 C19 1.43(2) . ? 
C18 H18A 0.9700 . ? 
C18 H18B 0.9700 . ? 
C19 C20 1.53(2) . ? 
C19 H19A 0.9700 . ? 
C19 H19B 0.9700 . ? 
C20 H20A 0.9700 . ? 
C20 H20B 0.9700 . ? 
C21 C26 1.487(17) . ? 
C21 C22 1.527(17) . ? 
C21 H21 0.9800 . ? 
C22 C23 1.50(2) . ? 
C22 H22A 0.9700 . ? 
C22 H22B 0.9700 . ? 
C23 C24 1.51(2) . ? 
C23 H23A 0.9700 . ? 
C23 H23B 0.9700 . ? 
C24 C25 1.52(2) . ? 
C24 H24A 0.9700 . ? 
C24 H24B 0.9700 . ? 
C25 C26 1.528(18) . ? 
C25 H25A 0.9700 . ? 
C25 H25B 0.9700 . ? 
C26 H26A 0.9700 . ? 
C26 H26B 0.9700 . ? 
O1 C27 1.482(10) . ? 
O1 C30 1.496(10) . ? 
C27 C28 1.476(10) . ? 
C27 H27A 0.9700 . ? 
C27 H27B 0.9700 . ? 
C28 C29 1.459(10) . ? 
C28 H28A 0.9700 . ? 
C28 H28B 0.9700 . ? 
C29 C30 1.486(10) . ? 
C29 H29A 0.9700 . ? 
C29 H29B 0.9700 . ? 
C30 H30A 0.9700 . ? 
C30 H30B 0.9700 . ? 
  
loop_ 
 _geom_angle_atom_site_label_1 
 _geom_angle_atom_site_label_2 
 _geom_angle_atom_site_label_3 
 _geom_angle 
 _geom_angle_site_symmetry_1 
 _geom_angle_site_symmetry_3 
 _geom_angle_publ_flag 
N1 Yb1 N2 58.7(3) . . ? 
N1 Yb1 C2 117.2(11) . . ? 
N2 Yb1 C2 95.4(6) . . ? 
N1 Yb1 C1 89.8(6) . . ? 
N2 Yb1 C1 90.0(9) . . ? 
C2 Yb1 C1 29.4(8) . . ? 
N1 Yb1 C3 135.5(5) . . ? 
N2 Yb1 C3 123.1(10) . . ? 
C2 Yb1 C3 28.7(7) . . ? 
C1 Yb1 C3 48.1(7) . . ? 
N1 Yb1 C10 110.1(7) . . ? 
N2 Yb1 C10 135.8(6) . . ? 
C2 Yb1 C10 123.8(11) . . ? 
C1 Yb1 C10 134.1(11) . . ? 
C3 Yb1 C10 95.2(11) . . ? 
N1 Yb1 C5 85.6(9) . . ? 
N2 Yb1 C5 111.0(11) . . ? 
C2 Yb1 C5 48.9(9) . . ? 
C1 Yb1 C5 28.1(11) . . ? 
C3 Yb1 C5 50.8(8) . . ? 
C10 Yb1 C5 110.3(11) . . ? 
N1 Yb1 C8 122.1(7) . . ? 
N2 Yb1 C8 96.3(6) . . ? 
C2 Yb1 C8 116.4(12) . . ? 
C1 Yb1 C8 145.8(11) . . ? 
C3 Yb1 C8 102.4(7) . . ? 
C10 Yb1 C8 50.7(6) . . ? 
C5 Yb1 C8 149.2(13) . . ? 
N1 Yb1 C9 137.0(5) . . ? 
N2 Yb1 C9 126.9(7) . . ? 
C2 Yb1 C9 105.0(12) . . ? 
C1 Yb1 C9 129.3(7) . . ? 
C3 Yb1 C9 81.3(8) . . ? 
C10 Yb1 C9 31.4(5) . . ? 
C5 Yb1 C9 119.5(13) . . ? 
C8 Yb1 C9 30.8(6) . . ? 
N1 Yb1 C7 92.5(5) . . ? 
N2 Yb1 C7 85.9(5) . . ? 
C2 Yb1 C7 146.0(11) . . ? 
C1 Yb1 C7 173.4(13) . . ? 
C3 Yb1 C7 131.1(7) . . ? 
C10 Yb1 C7 50.4(6) . . ? 
C5 Yb1 C7 158.4(9) . . ? 
C8 Yb1 C7 30.3(5) . . ? 
C9 Yb1 C7 51.0(6) . . ? 
N1 Yb1 C4 112.9(9) . . ? 
N2 Yb1 C4 138.2(5) . . ? 
C2 Yb1 C4 49.1(7) . . ? 
C1 Yb1 C4 48.2(10) . . ? 
C3 Yb1 C4 31.2(6) . . ? 
C10 Yb1 C4 85.9(7) . . ? 
C5 Yb1 C4 31.4(9) . . ? 
C8 Yb1 C4 117.8(9) . . ? 
C9 Yb1 C4 88.4(9) . . ? 
C7 Yb1 C4 135.6(6) . . ? 
N1 Yb1 C6 85.6(5) . . ? 
N2 Yb1 C6 107.3(6) . . ? 
C2 Yb1 C6 154.2(11) . . ? 
C1 Yb1 C6 156.2(14) . . ? 
C3 Yb1 C6 125.9(10) . . ? 
C10 Yb1 C6 30.7(5) . . ? 
C5 Yb1 C6 128.1(9) . . ? 
C8 Yb1 C6 50.3(6) . . ? 
C9 Yb1 C6 51.4(6) . . ? 
C7 Yb1 C6 30.4(5) . . ? 
C4 Yb1 C6 112.9(7) . . ? 
C11 N1 C12 123.6(10) . . ? 
C11 N1 Yb1 94.4(7) . . ? 
C12 N1 Yb1 129.5(7) . . ? 
C11 N2 C15 123.1(10) . . ? 
C11 N2 Yb1 93.8(7) . . ? 
C15 N2 Yb1 142.3(8) . . ? 
C11 N3 C21 121.5(10) . . ? 
C11 N3 H3 119.3 . . ? 
C21 N3 H3 119.3 . . ? 
C5 C1 C2 113(3) . . ? 
C5 C1 Yb1 76.6(17) . . ? 
C2 C1 Yb1 74.7(12) . . ? 
C5 C1 H1 123.4 . . ? 
C2 C1 H1 123.4 . . ? 
Yb1 C1 H1 116.7 . . ? 
C3 C2 C1 109(3) . . ? 
C3 C2 Yb1 76.4(12) . . ? 
C1 C2 Yb1 75.9(14) . . ? 
C3 C2 H2 125.4 . . ? 
C1 C2 H2 125.4 . . ? 
Yb1 C2 H2 114.4 . . ? 
C2 C3 C4 107(2) . . ? 
C2 C3 Yb1 74.9(13) . . ? 
C4 C3 Yb1 76.2(11) . . ? 
C2 C3 H3A 126.3 . . ? 
C4 C3 H3A 126.3 . . ? 
Yb1 C3 H3A 114.9 . . ? 
C3 C4 C5 104(2) . . ? 
C3 C4 Yb1 72.6(12) . . ? 
C5 C4 Yb1 73.0(12) . . ? 
C3 C4 H4 127.9 . . ? 
C5 C4 H4 127.9 . . ? 
Yb1 C4 H4 118.8 . . ? 
C1 C5 C4 106(3) . . ? 
C1 C5 Yb1 75.3(14) . . ? 
C4 C5 Yb1 75.6(17) . . ? 
C1 C5 H5 127.1 . . ? 
C4 C5 H5 127.1 . . ? 
Yb1 C5 H5 114.6 . . ? 
C7 C6 C10 106.9(18) . . ? 
C7 C6 Yb1 74.2(9) . . ? 
C10 C6 Yb1 72.4(9) . . ? 
C7 C6 H6 126.6 . . ? 
C10 C6 H6 126.6 . . ? 
Yb1 C6 H6 118.8 . . ? 
C8 C7 C6 108.6(18) . . ? 
C8 C7 Yb1 73.8(9) . . ? 
C6 C7 Yb1 75.4(9) . . ? 
C8 C7 H7 125.7 . . ? 
C6 C7 H7 125.7 . . ? 
Yb1 C7 H7 117.1 . . ? 
C7 C8 C9 110(2) . . ? 
C7 C8 Yb1 75.9(9) . . ? 
C9 C8 Yb1 75.3(10) . . ? 
C7 C8 H8 125.0 . . ? 
C9 C8 H8 125.0 . . ? 
Yb1 C8 H8 115.7 . . ? 
C8 C9 C10 105(2) . . ? 
C8 C9 Yb1 73.9(10) . . ? 
C10 C9 Yb1 73.0(10) . . ? 
C8 C9 H9 127.5 . . ? 
C10 C9 H9 127.5 . . ? 
Yb1 C9 H9 117.9 . . ? 
C6 C10 C9 109(2) . . ? 
C6 C10 Yb1 76.9(10) . . ? 
C9 C10 Yb1 75.5(10) . . ? 
C6 C10 H10 125.3 . . ? 
C9 C10 H10 125.3 . . ? 
Yb1 C10 H10 114.4 . . ? 
N2 C11 N1 113.1(10) . . ? 
N2 C11 N3 123.5(11) . . ? 
N1 C11 N3 123.4(10) . . ? 
N2 C11 Yb1 57.1(6) . . ? 
N1 C11 Yb1 56.1(6) . . ? 
N3 C11 Yb1 177.5(8) . . ? 
C13 C12 C14 116.8(10) . 13_667 ? 
C13 C12 N1 125.3(10) . . ? 
C14 C12 N1 117.7(10) 13_667 . ? 
C12 C13 C14 120.6(10) . . ? 
C12 C13 H13 119.7 . . ? 
C14 C13 H13 119.7 . . ? 
C12 C14 C13 122.6(11) 13_667 . ? 
C12 C14 H14 118.7 13_667 . ? 
C13 C14 H14 118.7 . . ? 
C16 C15 N2 114.0(11) . . ? 
C16 C15 C20 109.9(12) . . ? 
N2 C15 C20 109.0(11) . . ? 
C16 C15 H15 107.9 . . ? 
N2 C15 H15 107.9 . . ? 
C20 C15 H15 107.9 . . ? 
C15 C16 C17 113.8(13) . . ? 
C15 C16 H16A 108.8 . . ? 
C17 C16 H16A 108.8 . . ? 
C15 C16 H16B 108.8 . . ? 
C17 C16 H16B 108.8 . . ? 
H16A C16 H16B 107.7 . . ? 
C18 C17 C16 109.3(15) . . ? 
C18 C17 H17A 109.8 . . ? 
C16 C17 H17A 109.8 . . ? 
C18 C17 H17B 109.8 . . ? 
C16 C17 H17B 109.8 . . ? 
H17A C17 H17B 108.3 . . ? 
C19 C18 C17 113.2(15) . . ? 
C19 C18 H18A 108.9 . . ? 
C17 C18 H18A 108.9 . . ? 
C19 C18 H18B 108.9 . . ? 
C17 C18 H18B 108.9 . . ? 
H18A C18 H18B 107.8 . . ? 
C18 C19 C20 112.5(15) . . ? 
C18 C19 H19A 109.1 . . ? 
C20 C19 H19A 109.1 . . ? 
C18 C19 H19B 109.1 . . ? 
C20 C19 H19B 109.1 . . ? 
H19A C19 H19B 107.8 . . ? 
C15 C20 C19 114.4(14) . . ? 
C15 C20 H20A 108.7 . . ? 
C19 C20 H20A 108.7 . . ? 
C15 C20 H20B 108.7 . . ? 
C19 C20 H20B 108.7 . . ? 
H20A C20 H20B 107.6 . . ? 
C26 C21 N3 109.1(11) . . ? 
C26 C21 C22 112.3(11) . . ? 
N3 C21 C22 109.4(10) . . ? 
C26 C21 H21 108.7 . . ? 
N3 C21 H21 108.7 . . ? 
C22 C21 H21 108.7 . . ? 
C23 C22 C21 110.6(13) . . ? 
C23 C22 H22A 109.5 . . ? 
C21 C22 H22A 109.5 . . ? 
C23 C22 H22B 109.5 . . ? 
C21 C22 H22B 109.5 . . ? 
H22A C22 H22B 108.1 . . ? 
C22 C23 C24 112.2(15) . . ? 
C22 C23 H23A 109.2 . . ? 
C24 C23 H23A 109.2 . . ? 
C22 C23 H23B 109.2 . . ? 
C24 C23 H23B 109.2 . . ? 
H23A C23 H23B 107.9 . . ? 
C23 C24 C25 111.0(13) . . ? 
C23 C24 H24A 109.4 . . ? 
C25 C24 H24A 109.4 . . ? 
C23 C24 H24B 109.4 . . ? 
C25 C24 H24B 109.4 . . ? 
H24A C24 H24B 108.0 . . ? 
C24 C25 C26 111.5(13) . . ? 
C24 C25 H25A 109.3 . . ? 
C26 C25 H25A 109.3 . . ? 
C24 C25 H25B 109.3 . . ? 
C26 C25 H25B 109.3 . . ? 
H25A C25 H25B 108.0 . . ? 
C21 C26 C25 110.3(13) . . ? 
C21 C26 H26A 109.6 . . ? 
C25 C26 H26A 109.6 . . ? 
C21 C26 H26B 109.6 . . ? 
C25 C26 H26B 109.6 . . ? 
H26A C26 H26B 108.1 . . ? 
C27 O1 C30 95.0(12) . . ? 
C28 C27 O1 100.2(11) . . ? 
C28 C27 H27A 111.7 . . ? 
O1 C27 H27A 111.7 . . ? 
C28 C27 H27B 111.7 . . ? 
O1 C27 H27B 111.7 . . ? 
H27A C27 H27B 109.5 . . ? 
C29 C28 C27 106.3(9) . . ? 
C29 C28 H28A 110.5 . . ? 
C27 C28 H28A 110.5 . . ? 
C29 C28 H28B 110.5 . . ? 
C27 C28 H28B 110.5 . . ? 
H28A C28 H28B 108.7 . . ? 
C28 C29 C30 100.8(11) . . ? 
C28 C29 H29A 111.6 . . ? 
C30 C29 H29A 111.6 . . ? 
C28 C29 H29B 111.6 . . ? 
C30 C29 H29B 111.6 . . ? 
H29A C29 H29B 109.4 . . ? 
C29 C30 O1 95.9(12) . . ? 
C29 C30 H30A 112.6 . . ? 
O1 C30 H30A 112.6 . . ? 
C29 C30 H30B 112.6 . . ? 
O1 C30 H30B 112.6 . . ? 
H30A C30 H30B 110.1 . . ? 
  
_diffrn_measured_fraction_theta_max    0.999 
_diffrn_reflns_theta_full              25.00 
_diffrn_measured_fraction_theta_full   0.999 
_refine_diff_density_max    1.427 
_refine_diff_density_min   -0.942 
_refine_diff_density_rms    0.114 
  
#==================END

  
data_f60109a 
  
_audit_creation_method            SHELXL-97 
_chemical_name_systematic 
; 
 ? 
; 
_chemical_name_common             ? 
_chemical_melting_point           ? 
_chemical_formula_moiety          ? 
_chemical_formula_sum 
 'C52 H70 N6 Yb2' 
_chemical_formula_weight          1125.22 
  
loop_ 
 _atom_type_symbol 
 _atom_type_description 
 _atom_type_scat_dispersion_real 
 _atom_type_scat_dispersion_imag 
 _atom_type_scat_source 
 'C'  'C'   0.0033   0.0016 
 'International Tables Vol C Tables 4.2.6.8 and 6.1.1.4' 
 'H'  'H'   0.0000   0.0000 
 'International Tables Vol C Tables 4.2.6.8 and 6.1.1.4' 
 'N'  'N'   0.0061   0.0033 
 'International Tables Vol C Tables 4.2.6.8 and 6.1.1.4' 
 'Yb'  'Yb'  -0.3850   5.5486 
 'International Tables Vol C Tables 4.2.6.8 and 6.1.1.4' 
  
_symmetry_cell_setting            Triclinic 
_symmetry_space_group_name_H-M    P-1 
  
loop_ 
 _symmetry_equiv_pos_as_xyz 
 'x, y, z' 
 '-x, -y, -z' 
  
_cell_length_a                    13.573(4) 
_cell_length_b                    13.804(5) 
_cell_length_c                    16.113(5) 
_cell_angle_alpha                 104.092(4) 
_cell_angle_beta                  113.479(4) 
_cell_angle_gamma                 103.867(5) 
_cell_volume                      2486.0(14) 
_cell_formula_units_Z             2 
_cell_measurement_temperature     298(2) 
_cell_measurement_reflns_used     892 
_cell_measurement_theta_min       2.413 
_cell_measurement_theta_max       26.372 
  
_exptl_crystal_description        ? 
_exptl_crystal_colour             ? 
_exptl_crystal_size_max           0.30 
_exptl_crystal_size_mid           0.25 
_exptl_crystal_size_min           0.10 
_exptl_crystal_density_meas       ? 
_exptl_crystal_density_diffrn     1.503 
_exptl_crystal_density_method     'not measured' 
_exptl_crystal_F_000              1128 
_exptl_absorpt_coefficient_mu     3.778 
_exptl_absorpt_correction_type    multi-scan 
_exptl_absorpt_correction_T_min   0.3969 
_exptl_absorpt_correction_T_max   0.7038 
_exptl_absorpt_process_details    sadabs 
  
_exptl_special_details 
; 
 ? 
; 
  
_diffrn_ambient_temperature       298(2) 
_diffrn_radiation_wavelength      0.71073 
_diffrn_radiation_type            MoK\a 
_diffrn_radiation_source          'fine-focus sealed tube' 
_diffrn_radiation_monochromator   graphite 
_diffrn_measurement_device_type   'CCD area detector' 
_diffrn_measurement_method        'phi and omega scans' 
_diffrn_detector_area_resol_mean  ? 
_diffrn_standards_number          ? 
_diffrn_standards_interval_count  ? 
_diffrn_standards_interval_time   ? 
_diffrn_standards_decay_%         8.75 
_diffrn_reflns_number             10451 
_diffrn_reflns_av_R_equivalents   0.0286 
_diffrn_reflns_av_sigmaI/netI     0.0481 
_diffrn_reflns_limit_h_min        -15 
_diffrn_reflns_limit_h_max        16 
_diffrn_reflns_limit_k_min        -16 
_diffrn_reflns_limit_k_max        12 
_diffrn_reflns_limit_l_min        -19 
_diffrn_reflns_limit_l_max        16 
_diffrn_reflns_theta_min          1.67 
_diffrn_reflns_theta_max          25.01 
_reflns_number_total              8637 
_reflns_number_gt                 6383 
_reflns_threshold_expression      >2sigma(I) 
  
_computing_data_collection        'Bruker SMART' 
_computing_cell_refinement        'Bruker SMART' 
_computing_data_reduction         'Bruker SHELXTL' 
_computing_structure_solution     'SHELXS-97 (Sheldrick, 1990)' 
_computing_structure_refinement   'SHELXL-97 (Sheldrick, 1997)' 
_computing_molecular_graphics     'Bruker SHELXTL' 
_computing_publication_material   'Bruker SHELXTL' 
  
_refine_special_details 
; 
 Refinement of F^2^ against ALL reflections.  The weighted R-factor wR and 
 goodness of fit S are based on F^2^, conventional R-factors R are based 
 on F, with F set to zero for negative F^2^. The threshold expression of 
 F^2^ > 2sigma(F^2^) is used only for calculating R-factors(gt) etc. and is 
 not relevant to the choice of reflections for refinement.  R-factors based 
 on F^2^ are statistically about twice as large as those based on F, and R- 
 factors based on ALL data will be even larger. 
; 
  
_refine_ls_structure_factor_coef  Fsqd 
_refine_ls_matrix_type            full 
_refine_ls_weighting_scheme       calc 
_refine_ls_weighting_details 
 'calc w=1/[\s^2^(Fo^2^)+(0.0479P)^2^+0.0000P] where P=(Fo^2^+2Fc^2^)/3' 
_atom_sites_solution_primary      direct 
_atom_sites_solution_secondary    difmap 
_atom_sites_solution_hydrogens    geom 
_refine_ls_hydrogen_treatment     constr 
_refine_ls_extinction_method      none 
_refine_ls_extinction_coef        ? 
_refine_ls_number_reflns          8637 
_refine_ls_number_parameters      541 
_refine_ls_number_restraints      0 
_refine_ls_R_factor_all           0.0536 
_refine_ls_R_factor_gt            0.0356 
_refine_ls_wR_factor_ref          0.0892 
_refine_ls_wR_factor_gt           0.0820 
_refine_ls_goodness_of_fit_ref    0.958 
_refine_ls_restrained_S_all       0.958 
_refine_ls_shift/su_max           0.001 
_refine_ls_shift/su_mean          0.000 
  
loop_ 
 _atom_site_label 
 _atom_site_type_symbol 
 _atom_site_fract_x 
 _atom_site_fract_y 
 _atom_site_fract_z 
 _atom_site_U_iso_or_equiv 
 _atom_site_adp_type 
 _atom_site_occupancy 
 _atom_site_symmetry_multiplicity 
 _atom_site_calc_flag 
 _atom_site_refinement_flags 
 _atom_site_disorder_assembly 
 _atom_site_disorder_group 
Yb1 Yb -0.19198(2) 0.44972(2) 0.645254(19) 0.04680(9) Uani 1 1 d . . . 
Yb2 Yb 0.31558(2) 0.32533(2) 0.740587(17) 0.04026(9) Uani 1 1 d . . . 
N1 N -0.2158(4) 0.2912(4) 0.5368(3) 0.0445(12) Uani 1 1 d . . . 
N2 N -0.1298(4) 0.3266(4) 0.6985(3) 0.0434(11) Uani 1 1 d . . . 
N3 N -0.1777(4) 0.1512(4) 0.5884(3) 0.0466(12) Uani 1 1 d . . . 
H3A H -0.1660 0.1205 0.5418 0.056 Uiso 1 1 calc R . . 
N4 N 0.2347(4) 0.2832(4) 0.8333(3) 0.0386(11) Uani 1 1 d . . . 
N5 N 0.4149(4) 0.2904(4) 0.8749(3) 0.0408(11) Uani 1 1 d . . . 
N6 N 0.3350(4) 0.2426(4) 0.9721(3) 0.0483(12) Uani 1 1 d . . . 
H6A H 0.3988 0.2745 1.0267 0.058 Uiso 1 1 calc R . . 
C1 C 0.0163(18) 0.590(2) 0.7449(12) 0.184(14) Uani 1 1 d . . . 
H1 H 0.0617 0.5875 0.8048 0.220 Uiso 1 1 calc R . . 
C2 C -0.048(2) 0.6458(11) 0.730(3) 0.185(12) Uani 1 1 d . . . 
H2 H -0.0581 0.6904 0.7775 0.221 Uiso 1 1 calc R . . 
C3 C -0.0985(12) 0.6272(18) 0.635(2) 0.139(6) Uani 1 1 d . . . 
H3 H -0.1494 0.6571 0.6032 0.167 Uiso 1 1 calc R . . 
C4 C -0.064(2) 0.5616(18) 0.5956(12) 0.156(8) Uani 1 1 d . . . 
H4 H -0.0848 0.5334 0.5297 0.187 Uiso 1 1 calc R . . 
C5 C 0.0079(14) 0.5412(14) 0.667(3) 0.169(10) Uani 1 1 d . . . 
H5 H 0.0467 0.4955 0.6591 0.203 Uiso 1 1 calc R . . 
C6 C -0.3025(11) 0.502(2) 0.7353(10) 0.157(8) Uani 1 1 d . . . 
H6 H -0.2551 0.5478 0.8006 0.189 Uiso 1 1 calc R . . 
C7 C -0.3454(14) 0.5282(13) 0.6545(19) 0.143(6) Uani 1 1 d . . . 
H7 H -0.3347 0.5977 0.6557 0.172 Uiso 1 1 calc R . . 
C8 C -0.4046(11) 0.4379(19) 0.5745(10) 0.121(5) Uani 1 1 d . . . 
H8 H -0.4403 0.4342 0.5105 0.145 Uiso 1 1 calc R . . 
C9 C -0.4045(9) 0.3538(12) 0.6011(14) 0.125(4) Uani 1 1 d . . . 
H9 H -0.4393 0.2815 0.5595 0.150 Uiso 1 1 calc R . . 
C10 C -0.3458(14) 0.3919(18) 0.6973(16) 0.130(5) Uani 1 1 d . . . 
H10 H -0.3353 0.3494 0.7344 0.156 Uiso 1 1 calc R . . 
C11 C 0.3104(7) 0.5130(5) 0.8075(6) 0.065(2) Uani 1 1 d . . . 
H11 H 0.2590 0.5160 0.8318 0.079 Uiso 1 1 calc R . . 
C12 C 0.2863(8) 0.4948(6) 0.7113(6) 0.078(2) Uani 1 1 d . . . 
H12 H 0.2158 0.4837 0.6596 0.094 Uiso 1 1 calc R . . 
C13 C 0.3854(9) 0.4960(6) 0.7064(7) 0.081(3) Uani 1 1 d . . . 
H13 H 0.3934 0.4855 0.6506 0.097 Uiso 1 1 calc R . . 
C14 C 0.4693(7) 0.5151(6) 0.7967(7) 0.077(2) Uani 1 1 d . . . 
H14 H 0.5449 0.5202 0.8136 0.092 Uiso 1 1 calc R . . 
C15 C 0.4236(7) 0.5257(5) 0.8595(5) 0.0653(19) Uani 1 1 d . . . 
H15 H 0.4630 0.5393 0.9259 0.078 Uiso 1 1 calc R . . 
C16 C 0.1551(6) 0.1461(6) 0.5943(5) 0.065(2) Uani 1 1 d . . . 
H16 H 0.0853 0.1182 0.5939 0.078 Uiso 1 1 calc R . . 
C17 C 0.1805(8) 0.2197(7) 0.5534(5) 0.077(2) Uani 1 1 d . . . 
H17 H 0.1314 0.2505 0.5211 0.092 Uiso 1 1 calc R . . 
C18 C 0.2932(8) 0.2387(6) 0.5700(5) 0.076(2) Uani 1 1 d . . . 
H18 H 0.3332 0.2846 0.5505 0.091 Uiso 1 1 calc R . . 
C19 C 0.3350(7) 0.1779(7) 0.6201(6) 0.078(2) Uani 1 1 d . . . 
H19 H 0.4085 0.1752 0.6403 0.094 Uiso 1 1 calc R . . 
C20 C 0.2508(9) 0.1218(6) 0.6352(5) 0.077(2) Uani 1 1 d . . . 
H20 H 0.2573 0.0748 0.6680 0.092 Uiso 1 1 calc R . . 
C21 C -0.1734(5) 0.2549(5) 0.6064(4) 0.0417(13) Uani 1 1 d . . . 
C22 C -0.0343(5) 0.3316(4) 0.7793(4) 0.0368(12) Uani 1 1 d . . . 
C23 C 0.0524(4) 0.2999(4) 0.7720(4) 0.0357(12) Uani 1 1 d . . . 
H23 H 0.0436 0.2689 0.7101 0.043 Uiso 1 1 calc R . . 
C24 C 0.1518(5) 0.3123(4) 0.8531(4) 0.0373(12) Uani 1 1 d . . . 
C25 C 0.1657(5) 0.3592(5) 0.9451(4) 0.0451(14) Uani 1 1 d . . . 
H25 H 0.2322 0.3702 1.0007 0.054 Uiso 1 1 calc R . . 
C26 C 0.0783(5) 0.3898(5) 0.9530(4) 0.0519(16) Uani 1 1 d . . . 
H26 H 0.0866 0.4200 1.0149 0.062 Uiso 1 1 calc R . . 
C27 C -0.0201(5) 0.3770(5) 0.8723(4) 0.0482(15) Uani 1 1 d . . . 
H27 H -0.0768 0.3986 0.8800 0.058 Uiso 1 1 calc R . . 
C28 C 0.3301(5) 0.2719(5) 0.8961(4) 0.0404(13) Uani 1 1 d . . . 
C29 C -0.2716(5) 0.2249(5) 0.4329(4) 0.0505(15) Uani 1 1 d . . . 
H29 H -0.3181 0.1520 0.4218 0.061 Uiso 1 1 calc R . . 
C30 C -0.3511(6) 0.2703(6) 0.3739(5) 0.075(2) Uani 1 1 d . . . 
H30A H -0.3077 0.3453 0.3902 0.090 Uiso 1 1 calc R . . 
H30B H -0.4123 0.2676 0.3910 0.090 Uiso 1 1 calc R . . 
C31 C -0.4049(9) 0.2085(8) 0.2646(6) 0.103(3) Uani 1 1 d . . . 
H31A H -0.4574 0.1364 0.2471 0.124 Uiso 1 1 calc R . . 
H31B H -0.4503 0.2442 0.2298 0.124 Uiso 1 1 calc R . . 
C32 C -0.3181(11) 0.2002(8) 0.2326(6) 0.118(4) Uani 1 1 d . . . 
H32A H -0.2737 0.2711 0.2397 0.142 Uiso 1 1 calc R . . 
H32B H -0.3577 0.1535 0.1639 0.142 Uiso 1 1 calc R . . 
C33 C -0.2377(9) 0.1563(7) 0.2909(6) 0.098(3) Uani 1 1 d . . . 
H33A H -0.1770 0.1597 0.2730 0.117 Uiso 1 1 calc R . . 
H33B H -0.2802 0.0810 0.2747 0.117 Uiso 1 1 calc R . . 
C34 C -0.1822(6) 0.2176(6) 0.4011(5) 0.072(2) Uani 1 1 d . . . 
H34A H -0.1371 0.1813 0.4353 0.086 Uiso 1 1 calc R . . 
H34B H -0.1296 0.2898 0.4190 0.086 Uiso 1 1 calc R . . 
C35 C -0.2016(5) 0.0916(5) 0.6460(4) 0.0520(15) Uani 1 1 d . . . 
H35A H -0.1680 0.1429 0.7132 0.062 Uiso 1 1 calc R . . 
C36 C -0.3316(6) 0.0391(7) 0.6050(6) 0.081(2) Uani 1 1 d . . . 
H36A H -0.3665 -0.0077 0.5369 0.097 Uiso 1 1 calc R . . 
H36B H -0.3637 0.0947 0.6078 0.097 Uiso 1 1 calc R . . 
C37 C -0.3628(8) -0.0267(8) 0.6606(7) 0.105(3) Uani 1 1 d . . . 
H37A H -0.3341 0.0204 0.7275 0.127 Uiso 1 1 calc R . . 
H37B H -0.4465 -0.0615 0.6301 0.127 Uiso 1 1 calc R . . 
C38 C -0.3098(10) -0.1103(7) 0.6598(7) 0.110(4) Uani 1 1 d . . . 
H38A H -0.3446 -0.1614 0.5932 0.132 Uiso 1 1 calc R . . 
H38B H -0.3266 -0.1496 0.6981 0.132 Uiso 1 1 calc R . . 
C39 C -0.1790(9) -0.0600(7) 0.7016(7) 0.094(3) Uani 1 1 d . . . 
H39A H -0.1487 -0.1168 0.6958 0.113 Uiso 1 1 calc R . . 
H39B H -0.1433 -0.0157 0.7705 0.113 Uiso 1 1 calc R . . 
C40 C -0.1474(7) 0.0090(6) 0.6483(5) 0.0663(19) Uani 1 1 d . . . 
H40A H -0.0637 0.0452 0.6807 0.080 Uiso 1 1 calc R . . 
H40B H -0.1730 -0.0372 0.5818 0.080 Uiso 1 1 calc R . . 
C41 C 0.5195(5) 0.2678(5) 0.9230(4) 0.0420(13) Uani 1 1 d . . . 
H41 H 0.5386 0.2817 0.9913 0.050 Uiso 1 1 calc R . . 
C42 C 0.6191(5) 0.3442(5) 0.9214(5) 0.0556(16) Uani 1 1 d . . . 
H42A H 0.5981 0.3356 0.8542 0.067 Uiso 1 1 calc R . . 
H42B H 0.6328 0.4180 0.9569 0.067 Uiso 1 1 calc R . . 
C43 C 0.7292(6) 0.3237(6) 0.9664(6) 0.071(2) Uani 1 1 d . . . 
H43A H 0.7899 0.3723 0.9618 0.085 Uiso 1 1 calc R . . 
H43B H 0.7542 0.3385 1.0351 0.085 Uiso 1 1 calc R . . 
C44 C 0.7111(6) 0.2098(6) 0.9159(6) 0.079(2) Uani 1 1 d . . . 
H44A H 0.7822 0.1980 0.9477 0.095 Uiso 1 1 calc R . . 
H44B H 0.6923 0.1966 0.8484 0.095 Uiso 1 1 calc R . . 
C45 C 0.6134(6) 0.1317(6) 0.9189(6) 0.075(2) Uani 1 1 d . . . 
H45A H 0.6354 0.1407 0.9862 0.089 Uiso 1 1 calc R . . 
H45B H 0.6009 0.0583 0.8835 0.089 Uiso 1 1 calc R . . 
C46 C 0.5014(5) 0.1509(5) 0.8736(5) 0.0599(18) Uani 1 1 d . . . 
H46A H 0.4421 0.1033 0.8803 0.072 Uiso 1 1 calc R . . 
H46B H 0.4747 0.1340 0.8044 0.072 Uiso 1 1 calc R . . 
C47 C 0.2402(5) 0.1614(5) 0.9678(5) 0.0520(16) Uani 1 1 d . . . 
H47 H 0.1680 0.1713 0.9326 0.062 Uiso 1 1 calc R . . 
C48 C 0.2265(10) 0.0529(7) 0.9184(11) 0.182(7) Uani 1 1 d . . . 
H48A H 0.3013 0.0464 0.9461 0.218 Uiso 1 1 calc R . . 
H48B H 0.2012 0.0399 0.8499 0.218 Uiso 1 1 calc R . . 
C49 C 0.1344(10) -0.0390(8) 0.9261(11) 0.168(6) Uani 1 1 d . . . 
H49A H 0.0553 -0.0488 0.8835 0.201 Uiso 1 1 calc R . . 
H49B H 0.1436 -0.1075 0.9091 0.201 Uiso 1 1 calc R . . 
C50 C 0.1657(10) 0.0065(9) 1.0345(10) 0.121(4) Uani 1 1 d . . . 
H50A H 0.1140 -0.0456 1.0446 0.145 Uiso 1 1 calc R . . 
H50B H 0.2437 0.0110 1.0736 0.145 Uiso 1 1 calc R . . 
C51 C 0.1610(11) 0.1094(13) 1.0725(10) 0.167(6) Uani 1 1 d . . . 
H51A H 0.1727 0.1269 1.1386 0.201 Uiso 1 1 calc R . . 
H51B H 0.0885 0.1137 1.0310 0.201 Uiso 1 1 calc R . . 
C52 C 0.2638(8) 0.1806(11) 1.0692(7) 0.165(6) Uani 1 1 d . . . 
H52A H 0.2801 0.2558 1.1027 0.198 Uiso 1 1 calc R . . 
H52B H 0.3320 0.1657 1.1034 0.198 Uiso 1 1 calc R . . 
  
loop_ 
 _atom_site_aniso_label 
 _atom_site_aniso_U_11 
 _atom_site_aniso_U_22 
 _atom_site_aniso_U_33 
 _atom_site_aniso_U_23 
 _atom_site_aniso_U_13 
 _atom_site_aniso_U_12 
Yb1 0.04600(16) 0.04866(18) 0.05522(18) 0.02446(14) 0.02632(14) 0.02512(14) 
Yb2 0.05075(16) 0.03880(16) 0.03885(15) 0.01587(12) 0.02541(13) 0.02145(13) 
N1 0.043(3) 0.051(3) 0.041(3) 0.024(2) 0.018(2) 0.018(2) 
N2 0.046(3) 0.045(3) 0.045(3) 0.019(2) 0.023(2) 0.023(2) 
N3 0.062(3) 0.043(3) 0.043(3) 0.015(2) 0.031(3) 0.023(3) 
N4 0.041(3) 0.044(3) 0.032(2) 0.016(2) 0.018(2) 0.016(2) 
N5 0.040(2) 0.047(3) 0.045(3) 0.020(2) 0.024(2) 0.023(2) 
N6 0.043(3) 0.060(3) 0.041(3) 0.025(3) 0.018(2) 0.015(3) 
C1 0.119(14) 0.20(3) 0.077(9) 0.056(12) -0.013(8) -0.076(14) 
C2 0.20(2) 0.054(8) 0.26(3) -0.029(12) 0.16(2) -0.020(10) 
C3 0.114(9) 0.110(12) 0.190(16) 0.113(13) 0.041(13) 0.035(10) 
C4 0.167(17) 0.124(14) 0.122(12) 0.006(10) 0.102(13) -0.050(11) 
C5 0.062(8) 0.107(12) 0.36(3) 0.12(2) 0.108(14) 0.027(9) 
C6 0.088(8) 0.26(2) 0.098(9) -0.013(12) 0.052(7) 0.087(13) 
C7 0.117(11) 0.119(11) 0.232(17) 0.061(12) 0.098(12) 0.090(10) 
C8 0.084(8) 0.214(16) 0.131(11) 0.099(13) 0.063(8) 0.106(11) 
C9 0.052(6) 0.147(13) 0.168(14) 0.036(11) 0.066(8) 0.025(7) 
C10 0.118(11) 0.233(19) 0.165(14) 0.135(14) 0.120(12) 0.115(13) 
C11 0.083(5) 0.044(4) 0.100(6) 0.027(4) 0.064(5) 0.039(4) 
C12 0.094(6) 0.043(4) 0.078(6) 0.026(4) 0.017(5) 0.033(4) 
C13 0.148(8) 0.047(5) 0.092(6) 0.035(5) 0.091(7) 0.043(5) 
C14 0.078(5) 0.044(4) 0.123(7) 0.032(5) 0.063(6) 0.021(4) 
C15 0.087(5) 0.038(4) 0.057(4) 0.007(3) 0.029(4) 0.020(4) 
C16 0.060(4) 0.062(5) 0.051(4) 0.002(4) 0.027(4) 0.009(4) 
C17 0.102(6) 0.075(6) 0.037(4) 0.013(4) 0.015(4) 0.049(5) 
C18 0.100(6) 0.066(5) 0.059(5) 0.010(4) 0.054(5) 0.017(5) 
C19 0.083(6) 0.077(6) 0.062(5) -0.002(4) 0.033(4) 0.043(5) 
C20 0.127(7) 0.046(4) 0.050(4) 0.014(4) 0.036(5) 0.036(5) 
C21 0.038(3) 0.039(3) 0.047(3) 0.015(3) 0.022(3) 0.013(3) 
C22 0.044(3) 0.032(3) 0.038(3) 0.017(3) 0.020(3) 0.015(3) 
C23 0.045(3) 0.035(3) 0.033(3) 0.013(2) 0.023(3) 0.015(3) 
C24 0.041(3) 0.029(3) 0.044(3) 0.015(3) 0.022(3) 0.013(3) 
C25 0.047(3) 0.047(4) 0.035(3) 0.013(3) 0.014(3) 0.021(3) 
C26 0.065(4) 0.054(4) 0.034(3) 0.006(3) 0.024(3) 0.027(3) 
C27 0.057(4) 0.050(4) 0.048(4) 0.012(3) 0.031(3) 0.032(3) 
C28 0.043(3) 0.039(3) 0.037(3) 0.013(3) 0.018(3) 0.017(3) 
C29 0.058(4) 0.041(4) 0.038(3) 0.011(3) 0.019(3) 0.007(3) 
C30 0.071(5) 0.070(5) 0.050(4) 0.023(4) 0.003(4) 0.018(4) 
C31 0.117(8) 0.085(7) 0.054(5) 0.027(5) 0.001(5) 0.022(6) 
C32 0.198(12) 0.072(6) 0.051(5) 0.021(5) 0.047(7) 0.023(7) 
C33 0.147(8) 0.079(6) 0.068(5) 0.017(5) 0.068(6) 0.027(6) 
C34 0.084(5) 0.068(5) 0.052(4) 0.014(4) 0.037(4) 0.014(4) 
C35 0.069(4) 0.040(4) 0.045(4) 0.014(3) 0.029(3) 0.018(3) 
C36 0.072(5) 0.083(6) 0.090(6) 0.038(5) 0.045(5) 0.017(5) 
C37 0.120(8) 0.074(7) 0.116(7) 0.026(6) 0.077(7) 0.002(6) 
C38 0.164(10) 0.054(6) 0.090(6) 0.018(5) 0.074(7) -0.006(6) 
C39 0.147(9) 0.069(6) 0.091(6) 0.047(5) 0.063(6) 0.053(6) 
C40 0.092(5) 0.050(4) 0.060(4) 0.024(4) 0.038(4) 0.029(4) 
C41 0.046(3) 0.042(3) 0.044(3) 0.019(3) 0.024(3) 0.020(3) 
C42 0.052(4) 0.047(4) 0.074(4) 0.025(4) 0.033(3) 0.023(3) 
C43 0.052(4) 0.062(5) 0.106(6) 0.032(4) 0.043(4) 0.027(4) 
C44 0.066(5) 0.076(6) 0.109(6) 0.033(5) 0.048(5) 0.040(5) 
C45 0.071(5) 0.056(5) 0.102(6) 0.031(4) 0.036(5) 0.043(4) 
C46 0.054(4) 0.044(4) 0.077(5) 0.019(4) 0.026(4) 0.026(3) 
C47 0.045(3) 0.062(4) 0.060(4) 0.040(4) 0.025(3) 0.021(3) 
C48 0.184(11) 0.056(6) 0.367(19) 0.043(9) 0.222(14) 0.027(7) 
C49 0.128(9) 0.071(7) 0.296(18) 0.003(9) 0.151(12) 0.009(7) 
C50 0.119(8) 0.111(9) 0.209(13) 0.109(10) 0.102(9) 0.077(8) 
C51 0.141(10) 0.28(2) 0.181(13) 0.164(14) 0.109(10) 0.105(13) 
C52 0.098(7) 0.267(16) 0.097(7) 0.123(10) 0.034(6) -0.013(9) 
  
_geom_special_details 
; 
 All esds (except the esd in the dihedral angle between two l.s. planes) 
 are estimated using the full covariance matrix.  The cell esds are taken 
 into account individually in the estimation of esds in distances, angles 
 and torsion angles; correlations between esds in cell parameters are only 
 used when they are defined by crystal symmetry.  An approximate (isotropic) 
 treatment of cell esds is used for estimating esds involving l.s. planes. 
; 
  
loop_ 
 _geom_bond_atom_site_label_1 
 _geom_bond_atom_site_label_2 
 _geom_bond_distance 
 _geom_bond_site_symmetry_2 
 _geom_bond_publ_flag 
Yb1 N2 2.271(5) . ? 
Yb1 N1 2.301(5) . ? 
Yb1 C5 2.541(10) . ? 
Yb1 C4 2.544(11) . ? 
Yb1 C3 2.554(12) . ? 
Yb1 C2 2.557(13) . ? 
Yb1 C1 2.562(14) . ? 
Yb1 C6 2.572(9) . ? 
Yb1 C10 2.573(9) . ? 
Yb1 C9 2.580(9) . ? 
Yb1 C8 2.592(9) . ? 
Yb1 C7 2.604(9) . ? 
Yb2 N4 2.280(4) . ? 
Yb2 N5 2.286(4) . ? 
Yb2 C18 2.576(6) . ? 
Yb2 C11 2.582(6) . ? 
Yb2 C12 2.586(7) . ? 
Yb2 C15 2.590(6) . ? 
Yb2 C19 2.593(6) . ? 
Yb2 C13 2.594(7) . ? 
Yb2 C17 2.599(7) . ? 
Yb2 C14 2.600(7) . ? 
Yb2 C20 2.618(7) . ? 
Yb2 C16 2.628(7) . ? 
N1 C21 1.318(7) . ? 
N1 C29 1.457(7) . ? 
N2 C21 1.356(7) . ? 
N2 C22 1.396(6) . ? 
N3 C21 1.371(7) . ? 
N3 C35 1.459(7) . ? 
N3 H3A 0.8600 . ? 
N4 C28 1.362(6) . ? 
N4 C24 1.404(6) . ? 
N5 C28 1.312(7) . ? 
N5 C41 1.472(7) . ? 
N6 C28 1.363(7) . ? 
N6 C47 1.455(7) . ? 
N6 H6A 0.8600 . ? 
C1 C5 1.21(2) . ? 
C1 C2 1.29(2) . ? 
C1 H1 0.9300 . ? 
C2 C3 1.34(2) . ? 
C2 C5 2.03(3) . ? 
C2 H2 0.9300 . ? 
C3 C4 1.266(17) . ? 
C3 H3 0.9300 . ? 
C4 C5 1.326(19) . ? 
C4 H4 0.9300 . ? 
C5 H5 0.9300 . ? 
C6 C10 1.358(18) . ? 
C6 C7 1.379(18) . ? 
C6 H6 0.9300 . ? 
C7 C8 1.331(16) . ? 
C7 H7 0.9300 . ? 
C8 C9 1.332(15) . ? 
C8 H8 0.9300 . ? 
C9 C10 1.315(15) . ? 
C9 H9 0.9300 . ? 
C10 H10 0.9300 . ? 
C11 C15 1.366(9) . ? 
C11 C12 1.393(10) . ? 
C11 H11 0.9300 . ? 
C12 C13 1.375(11) . ? 
C12 H12 0.9300 . ? 
C13 C14 1.354(11) . ? 
C13 H13 0.9300 . ? 
C14 C15 1.379(10) . ? 
C14 H14 0.9300 . ? 
C15 H15 0.9300 . ? 
C16 C20 1.366(10) . ? 
C16 C17 1.387(10) . ? 
C16 H16 0.9300 . ? 
C17 C18 1.388(10) . ? 
C17 H17 0.9300 . ? 
C18 C19 1.368(10) . ? 
C18 H18 0.9300 . ? 
C19 C20 1.362(11) . ? 
C19 H19 0.9300 . ? 
C20 H20 0.9300 . ? 
C22 C23 1.386(7) . ? 
C22 C27 1.389(7) . ? 
C23 C24 1.390(7) . ? 
C23 H23 0.9300 . ? 
C24 C25 1.379(7) . ? 
C25 C26 1.392(7) . ? 
C25 H25 0.9300 . ? 
C26 C27 1.377(8) . ? 
C26 H26 0.9300 . ? 
C27 H27 0.9300 . ? 
C29 C30 1.501(8) . ? 
C29 C34 1.509(8) . ? 
C29 H29 0.9800 . ? 
C30 C31 1.520(10) . ? 
C30 H30A 0.9700 . ? 
C30 H30B 0.9700 . ? 
C31 C32 1.479(12) . ? 
C31 H31A 0.9700 . ? 
C31 H31B 0.9700 . ? 
C32 C33 1.489(12) . ? 
C32 H32A 0.9700 . ? 
C32 H32B 0.9700 . ? 
C33 C34 1.527(9) . ? 
C33 H33A 0.9700 . ? 
C33 H33B 0.9700 . ? 
C34 H34A 0.9700 . ? 
C34 H34B 0.9700 . ? 
C35 C40 1.497(9) . ? 
C35 C36 1.517(9) . ? 
C35 H35A 0.9800 . ? 
C36 C37 1.524(11) . ? 
C36 H36A 0.9700 . ? 
C36 H36B 0.9700 . ? 
C37 C38 1.498(13) . ? 
C37 H37A 0.9700 . ? 
C37 H37B 0.9700 . ? 
C38 C39 1.522(12) . ? 
C38 H38A 0.9700 . ? 
C38 H38B 0.9700 . ? 
C39 C40 1.525(10) . ? 
C39 H39A 0.9700 . ? 
C39 H39B 0.9700 . ? 
C40 H40A 0.9700 . ? 
C40 H40B 0.9700 . ? 
C41 C42 1.517(8) . ? 
C41 C46 1.526(8) . ? 
C41 H41 0.9800 . ? 
C42 C43 1.509(8) . ? 
C42 H42A 0.9700 . ? 
C42 H42B 0.9700 . ? 
C43 C44 1.493(9) . ? 
C43 H43A 0.9700 . ? 
C43 H43B 0.9700 . ? 
C44 C45 1.521(10) . ? 
C44 H44A 0.9700 . ? 
C44 H44B 0.9700 . ? 
C45 C46 1.522(8) . ? 
C45 H45A 0.9700 . ? 
C45 H45B 0.9700 . ? 
C46 H46A 0.9700 . ? 
C46 H46B 0.9700 . ? 
C47 C48 1.442(10) . ? 
C47 C52 1.474(10) . ? 
C47 H47 0.9800 . ? 
C48 C49 1.620(13) . ? 
C48 H48A 0.9700 . ? 
C48 H48B 0.9700 . ? 
C49 C50 1.541(15) . ? 
C49 H49A 0.9700 . ? 
C49 H49B 0.9700 . ? 
C50 C51 1.431(16) . ? 
C50 H50A 0.9700 . ? 
C50 H50B 0.9700 . ? 
C51 C52 1.530(14) . ? 
C51 H51A 0.9700 . ? 
C51 H51B 0.9700 . ? 
C52 H52A 0.9700 . ? 
C52 H52B 0.9700 . ? 
  
loop_ 
 _geom_angle_atom_site_label_1 
 _geom_angle_atom_site_label_2 
 _geom_angle_atom_site_label_3 
 _geom_angle 
 _geom_angle_site_symmetry_1 
 _geom_angle_site_symmetry_3 
 _geom_angle_publ_flag 
N2 Yb1 N1 59.02(16) . . ? 
N2 Yb1 C5 88.7(5) . . ? 
N1 Yb1 C5 90.8(7) . . ? 
N2 Yb1 C4 114.9(9) . . ? 
N1 Yb1 C4 91.7(6) . . ? 
C5 Yb1 C4 30.2(4) . . ? 
N2 Yb1 C3 136.0(4) . . ? 
N1 Yb1 C3 118.6(8) . . ? 
C5 Yb1 C3 48.0(5) . . ? 
C4 Yb1 C3 28.8(4) . . ? 
N2 Yb1 C2 117.2(9) . . ? 
N1 Yb1 C2 137.0(4) . . ? 
C5 Yb1 C2 47.0(6) . . ? 
C4 Yb1 C2 48.6(5) . . ? 
C3 Yb1 C2 30.3(5) . . ? 
N2 Yb1 C1 90.1(7) . . ? 
N1 Yb1 C1 114.7(9) . . ? 
C5 Yb1 C1 27.5(5) . . ? 
C4 Yb1 C1 48.4(5) . . ? 
C3 Yb1 C1 48.8(6) . . ? 
C2 Yb1 C1 29.2(5) . . ? 
N2 Yb1 C6 105.0(6) . . ? 
N1 Yb1 C6 134.2(5) . . ? 
C5 Yb1 C6 133.9(9) . . ? 
C4 Yb1 C6 131.1(10) . . ? 
C3 Yb1 C6 102.3(10) . . ? 
C2 Yb1 C6 88.8(6) . . ? 
C1 Yb1 C6 107.3(9) . . ? 
N2 Yb1 C10 84.4(3) . . ? 
N1 Yb1 C10 104.1(6) . . ? 
C5 Yb1 C10 157.2(11) . . ? 
C4 Yb1 C10 159.8(9) . . ? 
C3 Yb1 C10 131.7(8) . . ? 
C2 Yb1 C10 118.6(7) . . ? 
C1 Yb1 C10 130.5(8) . . ? 
C6 Yb1 C10 30.6(4) . . ? 
N2 Yb1 C9 94.8(5) . . ? 
N1 Yb1 C9 86.0(3) . . ? 
C5 Yb1 C9 173.1(11) . . ? 
C4 Yb1 C9 143.7(9) . . ? 
C3 Yb1 C9 129.1(6) . . ? 
C2 Yb1 C9 134.9(6) . . ? 
C1 Yb1 C9 157.9(9) . . ? 
C6 Yb1 C9 50.7(4) . . ? 
C10 Yb1 C9 29.6(3) . . ? 
N2 Yb1 C8 124.7(5) . . ? 
N1 Yb1 C8 100.4(5) . . ? 
C5 Yb1 C8 146.0(7) . . ? 
C4 Yb1 C8 116.6(9) . . ? 
C3 Yb1 C8 99.3(6) . . ? 
C2 Yb1 C8 111.4(9) . . ? 
C1 Yb1 C8 140.5(10) . . ? 
C6 Yb1 C8 50.5(4) . . ? 
C10 Yb1 C8 48.8(4) . . ? 
C9 Yb1 C8 29.9(4) . . ? 
N2 Yb1 C7 133.1(4) . . ? 
N1 Yb1 C7 130.0(5) . . ? 
C5 Yb1 C7 130.7(5) . . ? 
C4 Yb1 C7 110.9(9) . . ? 
C3 Yb1 C7 84.6(7) . . ? 
C2 Yb1 C7 85.8(7) . . ? 
C1 Yb1 C7 113.4(10) . . ? 
C6 Yb1 C7 30.9(4) . . ? 
C10 Yb1 C7 49.2(4) . . ? 
C9 Yb1 C7 49.4(4) . . ? 
C8 Yb1 C7 29.7(4) . . ? 
N4 Yb2 N5 58.56(15) . . ? 
N4 Yb2 C18 138.6(2) . . ? 
N5 Yb2 C18 125.0(2) . . ? 
N4 Yb2 C11 84.4(2) . . ? 
N5 Yb2 C11 105.9(2) . . ? 
C18 Yb2 C11 124.5(3) . . ? 
N4 Yb2 C12 109.4(2) . . ? 
N5 Yb2 C12 135.0(2) . . ? 
C18 Yb2 C12 93.3(3) . . ? 
C11 Yb2 C12 31.3(2) . . ? 
N4 Yb2 C15 91.9(2) . . ? 
N5 Yb2 C15 84.8(2) . . ? 
C18 Yb2 C15 128.5(3) . . ? 
C11 Yb2 C15 30.6(2) . . ? 
C12 Yb2 C15 50.8(2) . . ? 
N4 Yb2 C19 121.0(3) . . ? 
N5 Yb2 C19 95.0(2) . . ? 
C18 Yb2 C19 30.7(2) . . ? 
C11 Yb2 C19 153.5(3) . . ? 
C12 Yb2 C19 123.3(3) . . ? 
C15 Yb2 C19 141.2(3) . . ? 
N4 Yb2 C13 135.5(2) . . ? 
N5 Yb2 C13 126.5(3) . . ? 
C18 Yb2 C13 79.3(3) . . ? 
C11 Yb2 C13 51.1(2) . . ? 
C12 Yb2 C13 30.8(2) . . ? 
C15 Yb2 C13 50.6(2) . . ? 
C19 Yb2 C13 103.2(3) . . ? 
N4 Yb2 C17 114.0(2) . . ? 
N5 Yb2 C17 138.1(2) . . ? 
C18 Yb2 C17 31.1(2) . . ? 
C11 Yb2 C17 114.7(3) . . ? 
C12 Yb2 C17 86.9(3) . . ? 
C15 Yb2 C17 136.7(2) . . ? 
C19 Yb2 C17 50.9(2) . . ? 
C13 Yb2 C17 88.9(3) . . ? 
N4 Yb2 C14 122.2(2) . . ? 
N5 Yb2 C14 96.3(3) . . ? 
C18 Yb2 C14 99.1(3) . . ? 
C11 Yb2 C14 50.9(2) . . ? 
C12 Yb2 C14 50.5(3) . . ? 
C15 Yb2 C14 30.8(2) . . ? 
C19 Yb2 C14 111.6(3) . . ? 
C13 Yb2 C14 30.2(2) . . ? 
C17 Yb2 C14 117.1(3) . . ? 
N4 Yb2 C20 92.3(2) . . ? 
N5 Yb2 C20 87.6(2) . . ? 
C18 Yb2 C20 50.4(2) . . ? 
C11 Yb2 C20 161.5(3) . . ? 
C12 Yb2 C20 137.4(2) . . ? 
C15 Yb2 C20 167.8(3) . . ? 
C19 Yb2 C20 30.3(2) . . ? 
C13 Yb2 C20 129.7(2) . . ? 
C17 Yb2 C20 50.5(2) . . ? 
C14 Yb2 C20 141.8(3) . . ? 
N4 Yb2 C16 88.2(2) . . ? 
N5 Yb2 C16 110.7(2) . . ? 
C18 Yb2 C16 50.8(2) . . ? 
C11 Yb2 C16 131.3(3) . . ? 
C12 Yb2 C16 112.0(3) . . ? 
C15 Yb2 C16 161.6(3) . . ? 
C19 Yb2 C16 50.3(2) . . ? 
C13 Yb2 C16 119.6(3) . . ? 
C17 Yb2 C16 30.8(2) . . ? 
C14 Yb2 C16 147.5(3) . . ? 
C20 Yb2 C16 30.2(2) . . ? 
C21 N1 C29 123.2(5) . . ? 
C21 N1 Yb1 92.7(3) . . ? 
C29 N1 Yb1 143.0(4) . . ? 
C21 N2 C22 123.3(4) . . ? 
C21 N2 Yb1 93.0(3) . . ? 
C22 N2 Yb1 135.3(4) . . ? 
C21 N3 C35 121.8(5) . . ? 
C21 N3 H3A 119.1 . . ? 
C35 N3 H3A 119.1 . . ? 
C28 N4 C24 127.4(4) . . ? 
C28 N4 Yb2 93.5(3) . . ? 
C24 N4 Yb2 131.9(3) . . ? 
C28 N5 C41 122.9(5) . . ? 
C28 N5 Yb2 94.7(3) . . ? 
C41 N5 Yb2 141.2(3) . . ? 
C28 N6 C47 124.9(5) . . ? 
C28 N6 H6A 117.6 . . ? 
C47 N6 H6A 117.6 . . ? 
C5 C1 C2 108.6(19) . . ? 
C5 C1 Yb1 75.3(8) . . ? 
C2 C1 Yb1 75.2(10) . . ? 
C5 C1 H1 125.7 . . ? 
C2 C1 H1 125.7 . . ? 
Yb1 C1 H1 115.9 . . ? 
C1 C2 C3 107.0(16) . . ? 
C1 C2 C5 34.4(9) . . ? 
C3 C2 C5 72.6(11) . . ? 
C1 C2 Yb1 75.6(9) . . ? 
C3 C2 Yb1 74.7(8) . . ? 
C5 C2 Yb1 66.1(5) . . ? 
C1 C2 H2 126.5 . . ? 
C3 C2 H2 126.5 . . ? 
C5 C2 H2 160.9 . . ? 
Yb1 C2 H2 115.5 . . ? 
C4 C3 C2 107.4(15) . . ? 
C4 C3 Yb1 75.2(8) . . ? 
C2 C3 Yb1 75.0(8) . . ? 
C4 C3 H3 126.3 . . ? 
C2 C3 H3 126.3 . . ? 
Yb1 C3 H3 115.8 . . ? 
C3 C4 C5 106.1(15) . . ? 
C3 C4 Yb1 76.1(7) . . ? 
C5 C4 Yb1 74.8(7) . . ? 
C3 C4 H4 126.9 . . ? 
C5 C4 H4 126.9 . . ? 
Yb1 C4 H4 114.8 . . ? 
C1 C5 C4 110.9(18) . . ? 
C1 C5 C2 37.0(13) . . ? 
C4 C5 C2 73.9(10) . . ? 
C1 C5 Yb1 77.2(9) . . ? 
C4 C5 Yb1 75.0(6) . . ? 
C2 C5 Yb1 66.9(6) . . ? 
C1 C5 H5 124.5 . . ? 
C4 C5 H5 124.5 . . ? 
C2 C5 H5 161.5 . . ? 
Yb1 C5 H5 115.0 . . ? 
C10 C6 C7 103.8(13) . . ? 
C10 C6 Yb1 74.8(6) . . ? 
C7 C6 Yb1 75.8(6) . . ? 
C10 C6 H6 128.1 . . ? 
C7 C6 H6 128.1 . . ? 
Yb1 C6 H6 114.3 . . ? 
C8 C7 C6 108.7(14) . . ? 
C8 C7 Yb1 74.7(6) . . ? 
C6 C7 Yb1 73.3(6) . . ? 
C8 C7 H7 125.6 . . ? 
C6 C7 H7 125.6 . . ? 
Yb1 C7 H7 118.3 . . ? 
C7 C8 C9 108.9(13) . . ? 
C7 C8 Yb1 75.6(6) . . ? 
C9 C8 Yb1 74.6(5) . . ? 
C7 C8 H8 125.6 . . ? 
C9 C8 H8 125.6 . . ? 
Yb1 C8 H8 116.2 . . ? 
C10 C9 C8 107.3(14) . . ? 
C10 C9 Yb1 74.9(6) . . ? 
C8 C9 Yb1 75.6(6) . . ? 
C10 C9 H9 126.3 . . ? 
C8 C9 H9 126.3 . . ? 
Yb1 C9 H9 115.4 . . ? 
C9 C10 C6 111.2(14) . . ? 
C9 C10 Yb1 75.5(6) . . ? 
C6 C10 Yb1 74.6(7) . . ? 
C9 C10 H10 124.4 . . ? 
C6 C10 H10 124.4 . . ? 
Yb1 C10 H10 117.1 . . ? 
C15 C11 C12 107.2(7) . . ? 
C15 C11 Yb2 75.0(4) . . ? 
C12 C11 Yb2 74.5(4) . . ? 
C15 C11 H11 126.4 . . ? 
C12 C11 H11 126.4 . . ? 
Yb2 C11 H11 116.3 . . ? 
C13 C12 C11 107.7(7) . . ? 
C13 C12 Yb2 75.0(4) . . ? 
C11 C12 Yb2 74.2(4) . . ? 
C13 C12 H12 126.2 . . ? 
C11 C12 H12 126.2 . . ? 
Yb2 C12 H12 116.8 . . ? 
C14 C13 C12 108.4(7) . . ? 
C14 C13 Yb2 75.1(4) . . ? 
C12 C13 Yb2 74.3(4) . . ? 
C14 C13 H13 125.8 . . ? 
C12 C13 H13 125.8 . . ? 
Yb2 C13 H13 116.8 . . ? 
C13 C14 C15 108.3(7) . . ? 
C13 C14 Yb2 74.7(5) . . ? 
C15 C14 Yb2 74.2(4) . . ? 
C13 C14 H14 125.8 . . ? 
C15 C14 H14 125.8 . . ? 
Yb2 C14 H14 117.3 . . ? 
C11 C15 C14 108.4(7) . . ? 
C11 C15 Yb2 74.3(4) . . ? 
C14 C15 Yb2 75.0(4) . . ? 
C11 C15 H15 125.8 . . ? 
C14 C15 H15 125.8 . . ? 
Yb2 C15 H15 116.9 . . ? 
C20 C16 C17 107.9(7) . . ? 
C20 C16 Yb2 74.5(4) . . ? 
C17 C16 Yb2 73.4(4) . . ? 
C20 C16 H16 126.1 . . ? 
C17 C16 H16 126.1 . . ? 
Yb2 C16 H16 118.0 . . ? 
C16 C17 C18 107.0(7) . . ? 
C16 C17 Yb2 75.8(4) . . ? 
C18 C17 Yb2 73.6(4) . . ? 
C16 C17 H17 126.5 . . ? 
C18 C17 H17 126.5 . . ? 
Yb2 C17 H17 116.4 . . ? 
C19 C18 C17 108.0(7) . . ? 
C19 C18 Yb2 75.3(4) . . ? 
C17 C18 Yb2 75.3(4) . . ? 
C19 C18 H18 126.0 . . ? 
C17 C18 H18 126.0 . . ? 
Yb2 C18 H18 115.5 . . ? 
C20 C19 C18 108.3(7) . . ? 
C20 C19 Yb2 75.8(4) . . ? 
C18 C19 Yb2 74.0(4) . . ? 
C20 C19 H19 125.8 . . ? 
C18 C19 H19 125.8 . . ? 
Yb2 C19 H19 116.4 . . ? 
C19 C20 C16 108.7(7) . . ? 
C19 C20 Yb2 73.9(4) . . ? 
C16 C20 Yb2 75.3(4) . . ? 
C19 C20 H20 125.6 . . ? 
C16 C20 H20 125.6 . . ? 
Yb2 C20 H20 117.1 . . ? 
N1 C21 N2 114.8(5) . . ? 
N1 C21 N3 123.5(5) . . ? 
N2 C21 N3 121.7(5) . . ? 
N1 C21 Yb1 58.2(3) . . ? 
N2 C21 Yb1 57.0(3) . . ? 
N3 C21 Yb1 171.8(4) . . ? 
C23 C22 C27 117.8(5) . . ? 
C23 C22 N2 122.8(5) . . ? 
C27 C22 N2 119.2(5) . . ? 
C22 C23 C24 122.9(5) . . ? 
C22 C23 H23 118.6 . . ? 
C24 C23 H23 118.6 . . ? 
C25 C24 C23 118.8(5) . . ? 
C25 C24 N4 125.5(5) . . ? 
C23 C24 N4 115.6(5) . . ? 
C24 C25 C26 118.7(5) . . ? 
C24 C25 H25 120.6 . . ? 
C26 C25 H25 120.6 . . ? 
C27 C26 C25 122.1(5) . . ? 
C27 C26 H26 118.9 . . ? 
C25 C26 H26 118.9 . . ? 
C26 C27 C22 119.7(5) . . ? 
C26 C27 H27 120.1 . . ? 
C22 C27 H27 120.1 . . ? 
N5 C28 N4 113.2(5) . . ? 
N5 C28 N6 124.1(5) . . ? 
N4 C28 N6 122.7(5) . . ? 
N5 C28 Yb2 56.7(3) . . ? 
N4 C28 Yb2 56.6(3) . . ? 
N6 C28 Yb2 178.5(4) . . ? 
N1 C29 C30 110.0(5) . . ? 
N1 C29 C34 110.8(5) . . ? 
C30 C29 C34 110.7(6) . . ? 
N1 C29 H29 108.4 . . ? 
C30 C29 H29 108.4 . . ? 
C34 C29 H29 108.4 . . ? 
C29 C30 C31 112.0(6) . . ? 
C29 C30 H30A 109.2 . . ? 
C31 C30 H30A 109.2 . . ? 
C29 C30 H30B 109.2 . . ? 
C31 C30 H30B 109.2 . . ? 
H30A C30 H30B 107.9 . . ? 
C32 C31 C30 113.2(8) . . ? 
C32 C31 H31A 108.9 . . ? 
C30 C31 H31A 108.9 . . ? 
C32 C31 H31B 108.9 . . ? 
C30 C31 H31B 108.9 . . ? 
H31A C31 H31B 107.7 . . ? 
C31 C32 C33 111.4(8) . . ? 
C31 C32 H32A 109.3 . . ? 
C33 C32 H32A 109.3 . . ? 
C31 C32 H32B 109.3 . . ? 
C33 C32 H32B 109.3 . . ? 
H32A C32 H32B 108.0 . . ? 
C32 C33 C34 112.8(7) . . ? 
C32 C33 H33A 109.0 . . ? 
C34 C33 H33A 109.0 . . ? 
C32 C33 H33B 109.0 . . ? 
C34 C33 H33B 109.0 . . ? 
H33A C33 H33B 107.8 . . ? 
C29 C34 C33 112.0(6) . . ? 
C29 C34 H34A 109.2 . . ? 
C33 C34 H34A 109.2 . . ? 
C29 C34 H34B 109.2 . . ? 
C33 C34 H34B 109.2 . . ? 
H34A C34 H34B 107.9 . . ? 
N3 C35 C40 111.2(5) . . ? 
N3 C35 C36 109.8(5) . . ? 
C40 C35 C36 110.8(6) . . ? 
N3 C35 H35A 108.3 . . ? 
C40 C35 H35A 108.3 . . ? 
C36 C35 H35A 108.3 . . ? 
C35 C36 C37 112.6(7) . . ? 
C35 C36 H36A 109.1 . . ? 
C37 C36 H36A 109.1 . . ? 
C35 C36 H36B 109.1 . . ? 
C37 C36 H36B 109.1 . . ? 
H36A C36 H36B 107.8 . . ? 
C38 C37 C36 109.5(7) . . ? 
C38 C37 H37A 109.8 . . ? 
C36 C37 H37A 109.8 . . ? 
C38 C37 H37B 109.8 . . ? 
C36 C37 H37B 109.8 . . ? 
H37A C37 H37B 108.2 . . ? 
C37 C38 C39 111.7(7) . . ? 
C37 C38 H38A 109.3 . . ? 
C39 C38 H38A 109.3 . . ? 
C37 C38 H38B 109.3 . . ? 
C39 C38 H38B 109.3 . . ? 
H38A C38 H38B 107.9 . . ? 
C38 C39 C40 111.5(7) . . ? 
C38 C39 H39A 109.3 . . ? 
C40 C39 H39A 109.3 . . ? 
C38 C39 H39B 109.3 . . ? 
C40 C39 H39B 109.3 . . ? 
H39A C39 H39B 108.0 . . ? 
C35 C40 C39 112.0(6) . . ? 
C35 C40 H40A 109.2 . . ? 
C39 C40 H40A 109.2 . . ? 
C35 C40 H40B 109.2 . . ? 
C39 C40 H40B 109.2 . . ? 
H40A C40 H40B 107.9 . . ? 
N5 C41 C42 108.5(5) . . ? 
N5 C41 C46 111.9(5) . . ? 
C42 C41 C46 110.4(5) . . ? 
N5 C41 H41 108.7 . . ? 
C42 C41 H41 108.7 . . ? 
C46 C41 H41 108.7 . . ? 
C43 C42 C41 111.9(5) . . ? 
C43 C42 H42A 109.2 . . ? 
C41 C42 H42A 109.2 . . ? 
C43 C42 H42B 109.2 . . ? 
C41 C42 H42B 109.2 . . ? 
H42A C42 H42B 107.9 . . ? 
C44 C43 C42 111.1(6) . . ? 
C44 C43 H43A 109.4 . . ? 
C42 C43 H43A 109.4 . . ? 
C44 C43 H43B 109.4 . . ? 
C42 C43 H43B 109.4 . . ? 
H43A C43 H43B 108.0 . . ? 
C43 C44 C45 110.6(6) . . ? 
C43 C44 H44A 109.5 . . ? 
C45 C44 H44A 109.5 . . ? 
C43 C44 H44B 109.5 . . ? 
C45 C44 H44B 109.5 . . ? 
H44A C44 H44B 108.1 . . ? 
C44 C45 C46 111.2(6) . . ? 
C44 C45 H45A 109.4 . . ? 
C46 C45 H45A 109.4 . . ? 
C44 C45 H45B 109.4 . . ? 
C46 C45 H45B 109.4 . . ? 
H45A C45 H45B 108.0 . . ? 
C45 C46 C41 111.1(5) . . ? 
C45 C46 H46A 109.4 . . ? 
C41 C46 H46A 109.4 . . ? 
C45 C46 H46B 109.4 . . ? 
C41 C46 H46B 109.4 . . ? 
H46A C46 H46B 108.0 . . ? 
C48 C47 N6 112.6(6) . . ? 
C48 C47 C52 111.0(9) . . ? 
N6 C47 C52 107.4(6) . . ? 
C48 C47 H47 108.6 . . ? 
N6 C47 H47 108.6 . . ? 
C52 C47 H47 108.6 . . ? 
C47 C48 C49 113.7(8) . . ? 
C47 C48 H48A 108.8 . . ? 
C49 C48 H48A 108.8 . . ? 
C47 C48 H48B 108.8 . . ? 
C49 C48 H48B 108.8 . . ? 
H48A C48 H48B 107.7 . . ? 
C50 C49 C48 103.4(9) . . ? 
C50 C49 H49A 111.1 . . ? 
C48 C49 H49A 111.1 . . ? 
C50 C49 H49B 111.1 . . ? 
C48 C49 H49B 111.1 . . ? 
H49A C49 H49B 109.1 . . ? 
C51 C50 C49 118.2(10) . . ? 
C51 C50 H50A 107.8 . . ? 
C49 C50 H50A 107.8 . . ? 
C51 C50 H50B 107.8 . . ? 
C49 C50 H50B 107.8 . . ? 
H50A C50 H50B 107.1 . . ? 
C50 C51 C52 99.1(11) . . ? 
C50 C51 H51A 112.0 . . ? 
C52 C51 H51A 112.0 . . ? 
C50 C51 H51B 112.0 . . ? 
C52 C51 H51B 112.0 . . ? 
H51A C51 H51B 109.6 . . ? 
C47 C52 C51 111.6(9) . . ? 
C47 C52 H52A 109.3 . . ? 
C51 C52 H52A 109.3 . . ? 
C47 C52 H52B 109.3 . . ? 
C51 C52 H52B 109.3 . . ? 
H52A C52 H52B 108.0 . . ? 
  
_diffrn_measured_fraction_theta_max    0.985 
_diffrn_reflns_theta_full              25.01 
_diffrn_measured_fraction_theta_full   0.985 
_refine_diff_density_max    1.422 
_refine_diff_density_min   -0.900 
_refine_diff_density_rms    0.104 
  
#=====================END

  
data_f60410a 
  
_audit_creation_method            SHELXL-97 
_chemical_name_systematic 
; 
 ? 
; 
_chemical_name_common             ? 
_chemical_melting_point           ? 
_chemical_formula_moiety          ? 
_chemical_formula_sum 
 'C59 H74 N6 Yb2' 
_chemical_formula_weight          1213.32 
  
loop_ 
 _atom_type_symbol 
 _atom_type_description 
 _atom_type_scat_dispersion_real 
 _atom_type_scat_dispersion_imag 
 _atom_type_scat_source 
 'C'  'C'   0.0033   0.0016 
 'International Tables Vol C Tables 4.2.6.8 and 6.1.1.4' 
 'H'  'H'   0.0000   0.0000 
 'International Tables Vol C Tables 4.2.6.8 and 6.1.1.4' 
 'N'  'N'   0.0061   0.0033 
 'International Tables Vol C Tables 4.2.6.8 and 6.1.1.4' 
 'Yb'  'Yb'  -0.3850   5.5486 
 'International Tables Vol C Tables 4.2.6.8 and 6.1.1.4' 
  
_symmetry_cell_setting            Monoclinic 
_symmetry_space_group_name_H-M    P2(1)/c 
  
loop_ 
 _symmetry_equiv_pos_as_xyz 
 'x, y, z' 
 '-x, y+1/2, -z+1/2' 
 '-x, -y, -z' 
 'x, -y-1/2, z-1/2' 
  
_cell_length_a                    9.453(3) 
_cell_length_b                    35.987(10) 
_cell_length_c                    8.267(2) 
_cell_angle_alpha                 90.00 
_cell_angle_beta                  103.094(4) 
_cell_angle_gamma                 90.00 
_cell_volume                      2739.2(14) 
_cell_formula_units_Z             2 
_cell_measurement_temperature     293(2) 
_cell_measurement_reflns_used     900 
_cell_measurement_theta_min       2.283 
_cell_measurement_theta_max       23.623 
  
_exptl_crystal_description        ? 
_exptl_crystal_colour             ? 
_exptl_crystal_size_max           0.50 
_exptl_crystal_size_mid           0.10 
_exptl_crystal_size_min           0.05 
_exptl_crystal_density_meas       ? 
_exptl_crystal_density_diffrn     1.471 
_exptl_crystal_density_method     'not measured' 
_exptl_crystal_F_000              1220 
_exptl_absorpt_coefficient_mu     3.435 
_exptl_absorpt_correction_type    multi-scan 
_exptl_absorpt_correction_T_min   0.2785 
_exptl_absorpt_correction_T_max   0.8470 
_exptl_absorpt_process_details    sadabs 
  
_exptl_special_details 
; 
 ? 
; 
  
_diffrn_ambient_temperature       293(2) 
_diffrn_radiation_wavelength      0.71073 
_diffrn_radiation_type            MoK\a 
_diffrn_radiation_source          'fine-focus sealed tube' 
_diffrn_radiation_monochromator   graphite 
_diffrn_measurement_device_type   'CCD area detector' 
_diffrn_measurement_method        'phi and omega scans' 
_diffrn_detector_area_resol_mean  ? 
_diffrn_standards_number          ? 
_diffrn_standards_interval_count  ? 
_diffrn_standards_interval_time   ? 
_diffrn_standards_decay_%         8.07 
_diffrn_reflns_number             11463 
_diffrn_reflns_av_R_equivalents   0.0430 
_diffrn_reflns_av_sigmaI/netI     0.0535 
_diffrn_reflns_limit_h_min        -10 
_diffrn_reflns_limit_h_max        11 
_diffrn_reflns_limit_k_min        -41 
_diffrn_reflns_limit_k_max        42 
_diffrn_reflns_limit_l_min        -9 
_diffrn_reflns_limit_l_max        9 
_diffrn_reflns_theta_min          1.13 
_diffrn_reflns_theta_max          25.01 
_reflns_number_total              4825 
_reflns_number_gt                 3706 
_reflns_threshold_expression      >2sigma(I) 
  
_computing_data_collection        'Bruker SMART' 
_computing_cell_refinement        'Bruker SMART' 
_computing_data_reduction         'Bruker SHELXTL' 
_computing_structure_solution     'SHELXS-97 (Sheldrick, 1990)' 
_computing_structure_refinement   'SHELXL-97 (Sheldrick, 1997)' 
_computing_molecular_graphics     'Bruker SHELXTL' 
_computing_publication_material   'Bruker SHELXTL' 
  
_refine_special_details 
; 
 Refinement of F^2^ against ALL reflections.  The weighted R-factor wR and 
 goodness of fit S are based on F^2^, conventional R-factors R are based 
 on F, with F set to zero for negative F^2^. The threshold expression of 
 F^2^ > 2sigma(F^2^) is used only for calculating R-factors(gt) etc. and is 
 not relevant to the choice of reflections for refinement.  R-factors based 
 on F^2^ are statistically about twice as large as those based on F, and R- 
 factors based on ALL data will be even larger. 
; 
  
_refine_ls_structure_factor_coef  Fsqd 
_refine_ls_matrix_type            full 
_refine_ls_weighting_scheme       calc 
_refine_ls_weighting_details 
 'calc w=1/[\s^2^(Fo^2^)+(0.0625P)^2^+2.2762P] where P=(Fo^2^+2Fc^2^)/3' 
_atom_sites_solution_primary      direct 
_atom_sites_solution_secondary    difmap 
_atom_sites_solution_hydrogens    geom 
_refine_ls_hydrogen_treatment     constr 
_refine_ls_extinction_method      none 
_refine_ls_extinction_coef        ? 
_refine_ls_number_reflns          4825 
_refine_ls_number_parameters      329 
_refine_ls_number_restraints      0 
_refine_ls_R_factor_all           0.0744 
_refine_ls_R_factor_gt            0.0532 
_refine_ls_wR_factor_ref          0.1404 
_refine_ls_wR_factor_gt           0.1272 
_refine_ls_goodness_of_fit_ref    1.193 
_refine_ls_restrained_S_all       1.193 
_refine_ls_shift/su_max           0.468 
_refine_ls_shift/su_mean          0.001 
  
loop_ 
 _atom_site_label 
 _atom_site_type_symbol 
 _atom_site_fract_x 
 _atom_site_fract_y 
 _atom_site_fract_z 
 _atom_site_U_iso_or_equiv 
 _atom_site_adp_type 
 _atom_site_occupancy 
 _atom_site_symmetry_multiplicity 
 _atom_site_calc_flag 
 _atom_site_refinement_flags 
 _atom_site_disorder_assembly 
 _atom_site_disorder_group 
Yb1 Yb 0.62376(4) 0.334253(10) 0.84556(5) 0.04905(17) Uani 1 1 d . A . 
N1 N 0.7191(8) 0.38931(17) 0.7857(9) 0.0487(18) Uani 1 1 d . . . 
N2 N 0.8446(8) 0.3543(2) 0.9910(9) 0.063(2) Uani 1 1 d . . . 
N3 N 0.9440(9) 0.4123(2) 0.9419(11) 0.076(3) Uani 1 1 d . . . 
H3B H 0.9897 0.4146 1.0439 0.092 Uiso 1 1 calc R A . 
C1 C 0.6831(16) 0.3111(4) 0.5703(14) 0.088(4) Uani 1 1 d . . . 
H1A H 0.7175 0.3267 0.4901 0.105 Uiso 1 1 calc R A . 
C2 C 0.7696(15) 0.2909(4) 0.6937(17) 0.087(4) Uani 1 1 d . A . 
H2A H 0.8757 0.2894 0.7153 0.104 Uiso 1 1 calc R . . 
C3 C 0.680(2) 0.2676(3) 0.7615(18) 0.104(5) Uani 1 1 d . . . 
H3A H 0.7131 0.2468 0.8378 0.125 Uiso 1 1 calc R A . 
C4 C 0.5390(19) 0.2744(4) 0.677(2) 0.107(5) Uani 1 1 d . A . 
H4A H 0.4543 0.2594 0.6853 0.129 Uiso 1 1 calc R . . 
C5 C 0.5407(17) 0.3019(4) 0.5624(16) 0.097(4) Uani 1 1 d . A . 
H5A H 0.4577 0.3094 0.4742 0.116 Uiso 1 1 calc R . . 
C6 C 0.497(2) 0.3291(5) 1.0919(19) 0.115(5) Uani 1 1 d . . . 
H6A H 0.5348 0.3147 1.1931 0.138 Uiso 1 1 calc R A . 
C7 C 0.4043(17) 0.3162(5) 0.963(2) 0.109(5) Uani 1 1 d . A . 
H7A H 0.3616 0.2913 0.9561 0.131 Uiso 1 1 calc R . . 
C8 C 0.3553(14) 0.3444(7) 0.8541(17) 0.123(7) Uani 1 1 d . . . 
H8A H 0.2710 0.3438 0.7599 0.148 Uiso 1 1 calc R A . 
C9 C 0.4336(19) 0.3770(4) 0.930(3) 0.108(5) Uani 1 1 d . A . 
H9A H 0.4128 0.4028 0.8954 0.130 Uiso 1 1 calc R . . 
C10 C 0.5219(16) 0.3652(4) 1.076(2) 0.098(4) Uani 1 1 d . A . 
H10A H 0.5765 0.3814 1.1631 0.117 Uiso 1 1 calc R . . 
C11 C 0.8384(10) 0.3865(2) 0.9077(12) 0.057(2) Uani 1 1 d . A . 
C12 C 0.9887(10) 0.4371(3) 0.8203(14) 0.067(3) Uani 1 1 d . A . 
H12A H 0.9094 0.4547 0.7803 0.081 Uiso 1 1 calc R . . 
C13 C 1.0168(13) 0.4168(3) 0.6735(15) 0.085(3) Uani 1 1 d . . . 
H13A H 0.9293 0.4038 0.6179 0.103 Uiso 1 1 calc R A . 
H13B H 1.0921 0.3984 0.7107 0.103 Uiso 1 1 calc R . . 
C14 C 1.0637(15) 0.4429(4) 0.5517(19) 0.112(5) Uani 1 1 d . A . 
H14A H 0.9836 0.4591 0.5024 0.134 Uiso 1 1 calc R . . 
H14B H 1.0898 0.4286 0.4633 0.134 Uiso 1 1 calc R . . 
C15 C 1.1931(15) 0.4662(4) 0.639(2) 0.117(5) Uani 1 1 d . . . 
H15A H 1.2773 0.4502 0.6716 0.141 Uiso 1 1 calc R A . 
H15B H 1.2144 0.4845 0.5617 0.141 Uiso 1 1 calc R . . 
C16 C 1.1674(16) 0.4857(4) 0.789(2) 0.121(5) Uani 1 1 d . A . 
H16A H 1.0929 0.5045 0.7553 0.145 Uiso 1 1 calc R . . 
H16B H 1.2559 0.4982 0.8454 0.145 Uiso 1 1 calc R . . 
C17 C 1.1206(12) 0.4592(3) 0.9091(18) 0.093(4) Uani 1 1 d . . . 
H17A H 1.0971 0.4730 1.0002 0.112 Uiso 1 1 calc R A . 
H17B H 1.1996 0.4423 0.9547 0.112 Uiso 1 1 calc R . . 
C18 C 0.6555(8) 0.42013(19) 0.6825(11) 0.044(5) Uani 0.50 1 d PG A 1 
C19 C 0.6010(10) 0.4110(2) 0.5110(12) 0.055(5) Uani 0.50 1 d PG A 1 
C20 C 0.5315(10) 0.4389(2) 0.3967(11) 0.056(5) Uani 0.50 1 d PG A 1 
C21 C 0.5164(9) 0.4760(2) 0.4539(10) 0.051(6) Uani 0.50 1 d PG . 1 
C22 C 0.5709(7) 0.48512(19) 0.6255(8) 0.038(6) Uani 0.50 1 d PG . 1 
C23 C 0.6405(6) 0.45720(18) 0.7398(9) 0.044(4) Uani 0.50 1 d PG A 1 
C18' C 0.6648(8) 0.4238(2) 0.7383(11) 0.062(7) Uani 0.50 1 d PG A 2 
C19' C 0.6008(7) 0.42905(17) 0.5693(10) 0.043(4) Uani 0.50 1 d PG A 2 
C20' C 0.5396(7) 0.46355(18) 0.5133(8) 0.044(6) Uani 0.50 1 d PG . 2 
C21' C 0.5425(9) 0.4928(2) 0.6262(9) 0.055(7) Uani 0.50 1 d PG . 2 
C22' C 0.6065(9) 0.4876(2) 0.7952(11) 0.048(4) Uani 0.50 1 d PG . 2 
C23' C 0.6677(9) 0.4531(2) 0.8512(11) 0.040(4) Uani 0.50 1 d PG A 2 
C25 C 0.9732(12) 0.3430(3) 1.1162(14) 0.081(4) Uani 1 1 d . A . 
H25A H 1.0584 0.3568 1.1001 0.098 Uiso 1 1 calc R . . 
C26 C 0.955(2) 0.3486(7) 1.2740(18) 0.238(15) Uani 1 1 d . . . 
H26A H 0.8678 0.3358 1.2871 0.285 Uiso 1 1 calc R A . 
H26B H 0.9416 0.3750 1.2911 0.285 Uiso 1 1 calc R . . 
C27 C 1.084(3) 0.3346(9) 1.404(2) 0.33(3) Uani 1 1 d . A . 
H27A H 1.1707 0.3476 1.3902 0.399 Uiso 1 1 calc R . . 
H27B H 1.0696 0.3407 1.5134 0.399 Uiso 1 1 calc R . . 
C28 C 1.1083(17) 0.2964(5) 1.3972(19) 0.122(6) Uani 1 1 d . . . 
H28A H 1.1951 0.2898 1.4798 0.147 Uiso 1 1 calc R A . 
H28B H 1.0271 0.2832 1.4235 0.147 Uiso 1 1 calc R . . 
C29 C 1.1244(18) 0.2858(5) 1.245(2) 0.142(7) Uani 1 1 d . A . 
H29A H 1.1256 0.2589 1.2404 0.171 Uiso 1 1 calc R . . 
H29B H 1.2170 0.2948 1.2294 0.171 Uiso 1 1 calc R . . 
C30 C 0.9973(15) 0.3012(4) 1.0985(14) 0.171(9) Uani 1 1 d . . . 
H30A H 1.0220 0.2964 0.9928 0.205 Uiso 1 1 calc R A . 
H30B H 0.9080 0.2880 1.0995 0.205 Uiso 1 1 calc R . . 
C24 C 0.4571(15) 0.4765(4) 0.3413(14) 0.063(6) Uani 0.50 1 d PR . . 
  
loop_ 
 _atom_site_aniso_label 
 _atom_site_aniso_U_11 
 _atom_site_aniso_U_22 
 _atom_site_aniso_U_33 
 _atom_site_aniso_U_23 
 _atom_site_aniso_U_13 
 _atom_site_aniso_U_12 
Yb1 0.0573(3) 0.0357(2) 0.0483(3) 0.00547(18) -0.00031(16) 0.00484(18) 
N1 0.056(4) 0.024(4) 0.059(5) 0.009(3) 0.000(4) 0.007(3) 
N2 0.060(5) 0.063(5) 0.054(5) 0.020(4) -0.014(4) -0.010(4) 
N3 0.083(6) 0.068(6) 0.070(6) 0.013(5) 0.000(5) -0.021(5) 
C1 0.116(11) 0.089(9) 0.058(7) -0.023(7) 0.019(7) 0.009(8) 
C2 0.090(9) 0.072(8) 0.099(10) -0.020(7) 0.023(8) 0.010(7) 
C3 0.164(14) 0.042(7) 0.097(10) 0.000(6) 0.013(11) 0.022(8) 
C4 0.148(14) 0.059(8) 0.113(12) -0.039(8) 0.028(10) -0.029(9) 
C5 0.114(11) 0.092(10) 0.070(8) -0.031(7) -0.012(7) 0.013(8) 
C6 0.142(14) 0.137(16) 0.078(10) 0.025(10) 0.049(10) 0.029(12) 
C7 0.098(11) 0.117(13) 0.121(13) -0.024(11) 0.042(10) -0.033(9) 
C8 0.053(7) 0.24(2) 0.070(9) 0.022(12) 0.000(6) 0.028(10) 
C9 0.107(11) 0.073(9) 0.164(16) 0.037(10) 0.071(11) 0.046(8) 
C10 0.106(11) 0.077(10) 0.118(12) -0.028(8) 0.042(9) 0.004(8) 
C11 0.064(6) 0.043(5) 0.059(6) 0.006(4) 0.005(5) -0.001(4) 
C12 0.057(6) 0.045(6) 0.097(8) 0.014(5) 0.012(6) 0.006(4) 
C13 0.077(8) 0.080(9) 0.098(9) 0.014(7) 0.019(7) 0.010(6) 
C14 0.106(11) 0.117(12) 0.125(12) 0.037(10) 0.050(9) 0.011(9) 
C15 0.098(11) 0.094(11) 0.173(16) 0.036(10) 0.060(11) -0.003(8) 
C16 0.094(10) 0.108(13) 0.163(15) 0.041(11) 0.034(10) -0.015(8) 
C17 0.080(8) 0.064(8) 0.133(11) -0.002(7) 0.021(8) -0.021(6) 
C18 0.043(13) 0.016(10) 0.069(13) 0.021(8) 0.007(9) 0.010(8) 
C19 0.090(14) 0.026(10) 0.043(11) 0.005(8) 0.001(10) 0.021(9) 
C20 0.076(12) 0.037(10) 0.046(10) 0.003(8) -0.005(9) 0.021(9) 
C21 0.055(12) 0.000(9) 0.10(2) 0.002(11) 0.031(13) 0.012(8) 
C22 0.021(8) 0.037(11) 0.046(15) 0.018(10) -0.013(8) 0.003(8) 
C23 0.040(9) 0.035(10) 0.055(11) 0.020(9) 0.008(8) 0.013(7) 
C18' 0.039(13) 0.07(2) 0.076(15) 0.006(13) 0.011(10) -0.010(12) 
C19' 0.049(10) 0.028(10) 0.051(12) 0.003(8) 0.009(9) 0.003(8) 
C20' 0.038(10) 0.006(9) 0.090(16) 0.008(10) 0.020(10) 0.006(7) 
C21' 0.032(10) 0.09(2) 0.039(14) 0.038(13) 0.005(9) 0.000(12) 
C22' 0.041(9) 0.031(9) 0.064(12) 0.004(7) -0.003(8) 0.007(7) 
C23' 0.039(9) 0.038(9) 0.038(9) 0.014(8) 0.000(8) 0.002(7) 
C25 0.077(7) 0.067(7) 0.079(8) 0.036(6) -0.027(6) -0.021(5) 
C26 0.26(2) 0.37(3) 0.054(9) -0.037(13) -0.028(12) 0.25(2) 
C27 0.37(4) 0.47(5) 0.070(11) -0.076(19) -0.139(17) 0.30(4) 
C28 0.111(12) 0.137(15) 0.097(12) 0.061(11) -0.023(9) 0.000(10) 
C29 0.137(14) 0.162(16) 0.106(12) 0.009(11) -0.019(11) 0.094(12) 
C30 0.188(17) 0.21(2) 0.082(10) -0.018(11) -0.040(10) 0.145(15) 
C24 0.092(16) 0.031(10) 0.047(12) 0.010(9) -0.024(10) 0.020(10) 
  
_geom_special_details 
; 
 All esds (except the esd in the dihedral angle between two l.s. planes) 
 are estimated using the full covariance matrix.  The cell esds are taken 
 into account individually in the estimation of esds in distances, angles 
 and torsion angles; correlations between esds in cell parameters are only 
 used when they are defined by crystal symmetry.  An approximate (isotropic) 
 treatment of cell esds is used for estimating esds involving l.s. planes. 
; 
  
loop_ 
 _geom_bond_atom_site_label_1 
 _geom_bond_atom_site_label_2 
 _geom_bond_distance 
 _geom_bond_site_symmetry_2 
 _geom_bond_publ_flag 
Yb1 N1 2.277(7) . ? 
Yb1 N2 2.277(7) . ? 
Yb1 C7 2.566(13) . ? 
Yb1 C10 2.571(12) . ? 
Yb1 C5 2.573(11) . ? 
Yb1 C9 2.579(12) . ? 
Yb1 C8 2.581(12) . ? 
Yb1 C2 2.586(11) . ? 
Yb1 C3 2.589(11) . ? 
Yb1 C4 2.591(11) . ? 
Yb1 C6 2.596(13) . ? 
Yb1 C1 2.601(11) . ? 
N1 C11 1.336(11) . ? 
N1 C18' 1.366(9) . ? 
N1 C18 1.444(9) . ? 
N2 C11 1.344(11) . ? 
N2 C25 1.464(11) . ? 
N3 C11 1.346(11) . ? 
N3 C12 1.476(12) . ? 
C1 C2 1.363(16) . ? 
C1 C5 1.374(17) . ? 
C2 C3 1.394(18) . ? 
C3 C4 1.382(18) . ? 
C4 C5 1.374(18) . ? 
C6 C7 1.30(2) . ? 
C6 C10 1.333(19) . ? 
C7 C8 1.36(2) . ? 
C8 C9 1.45(2) . ? 
C9 C10 1.367(19) . ? 
C12 C13 1.492(15) . ? 
C12 C17 1.520(14) . ? 
C13 C14 1.515(16) . ? 
C14 C15 1.523(19) . ? 
C15 C16 1.50(2) . ? 
C16 C17 1.512(18) . ? 
C18 C19 1.433(5) . ? 
C18 C23 1.433(5) . ? 
C19 C20 1.433(5) . ? 
C20 C21 1.433(5) . ? 
C21 C22 1.433(5) . ? 
C21 C22 1.68(2) 3_666 ? 
C21 C21 1.942(18) 3_666 ? 
C22 C23 1.433(5) . ? 
C22 C24 1.444(13) 3_666 ? 
C22 C21 1.681(17) 3_666 ? 
C18' C19' 1.404(5) . ? 
C18' C23' 1.404(5) . ? 
C19' C20' 1.404(5) . ? 
C20' C21' 1.404(5) . ? 
C20' C24 1.531(11) . ? 
C20' C21' 1.998(17) 3_666 ? 
C21' C24 1.136(14) 3_666 ? 
C21' C22' 1.404(5) . ? 
C21' C20' 1.998(19) 3_666 ? 
C22' C23' 1.403(5) . ? 
C22' C24 1.731(14) 3_666 ? 
C25 C26 1.370(19) . ? 
C25 C30 1.536(15) . ? 
C26 C27 1.521(18) . ? 
C27 C28 1.40(3) . ? 
C28 C29 1.35(2) . ? 
C29 C30 1.601(15) . ? 
C24 C21' 1.136(16) 3_666 ? 
C24 C22 1.444(16) 3_666 ? 
C24 C22' 1.731(19) 3_666 ? 
  
loop_ 
 _geom_angle_atom_site_label_1 
 _geom_angle_atom_site_label_2 
 _geom_angle_atom_site_label_3 
 _geom_angle 
 _geom_angle_site_symmetry_1 
 _geom_angle_site_symmetry_3 
 _geom_angle_publ_flag 
N1 Yb1 N2 58.6(3) . . ? 
N1 Yb1 C7 134.1(4) . . ? 
N2 Yb1 C7 127.1(5) . . ? 
N1 Yb1 C10 91.0(4) . . ? 
N2 Yb1 C10 85.7(4) . . ? 
C7 Yb1 C10 50.1(5) . . ? 
N1 Yb1 C5 104.5(4) . . ? 
N2 Yb1 C5 132.7(4) . . ? 
C7 Yb1 C5 97.1(6) . . ? 
C10 Yb1 C5 141.3(5) . . ? 
N1 Yb1 C9 82.8(4) . . ? 
N2 Yb1 C9 106.3(5) . . ? 
C7 Yb1 C9 51.3(5) . . ? 
C10 Yb1 C9 30.8(4) . . ? 
C5 Yb1 C9 115.4(6) . . ? 
N1 Yb1 C8 108.9(5) . . ? 
N2 Yb1 C8 137.0(5) . . ? 
C7 Yb1 C8 30.7(5) . . ? 
C10 Yb1 C8 51.9(5) . . ? 
C5 Yb1 C8 89.4(5) . . ? 
C9 Yb1 C8 32.7(5) . . ? 
N1 Yb1 C2 98.0(4) . . ? 
N2 Yb1 C2 85.5(4) . . ? 
C7 Yb1 C2 126.7(5) . . ? 
C10 Yb1 C2 161.8(5) . . ? 
C5 Yb1 C2 51.1(4) . . ? 
C9 Yb1 C2 166.3(6) . . ? 
C8 Yb1 C2 137.2(5) . . ? 
N1 Yb1 C3 129.2(4) . . ? 
N2 Yb1 C3 102.4(4) . . ? 
C7 Yb1 C3 95.9(5) . . ? 
C10 Yb1 C3 137.3(5) . . ? 
C5 Yb1 C3 51.3(4) . . ? 
C9 Yb1 C3 145.6(6) . . ? 
C8 Yb1 C3 113.7(7) . . ? 
C2 Yb1 C3 31.3(4) . . ? 
N1 Yb1 C4 134.1(4) . . ? 
N2 Yb1 C4 132.9(5) . . ? 
C7 Yb1 C4 79.4(5) . . ? 
C10 Yb1 C4 129.4(5) . . ? 
C5 Yb1 C4 30.9(4) . . ? 
C9 Yb1 C4 119.4(6) . . ? 
C8 Yb1 C4 86.9(6) . . ? 
C2 Yb1 C4 51.1(5) . . ? 
C3 Yb1 C4 31.0(4) . . ? 
N1 Yb1 C6 120.6(5) . . ? 
N2 Yb1 C6 98.1(5) . . ? 
C7 Yb1 C6 29.1(4) . . ? 
C10 Yb1 C6 29.9(4) . . ? 
C5 Yb1 C6 125.5(6) . . ? 
C9 Yb1 C6 49.8(5) . . ? 
C8 Yb1 C6 49.9(5) . . ? 
C2 Yb1 C6 136.9(5) . . ? 
C3 Yb1 C6 107.8(5) . . ? 
C4 Yb1 C6 102.7(6) . . ? 
N1 Yb1 C1 85.1(4) . . ? 
N2 Yb1 C1 102.1(4) . . ? 
C7 Yb1 C1 127.1(5) . . ? 
C10 Yb1 C1 167.6(5) . . ? 
C5 Yb1 C1 30.8(4) . . ? 
C9 Yb1 C1 136.8(6) . . ? 
C8 Yb1 C1 118.5(5) . . ? 
C2 Yb1 C1 30.5(4) . . ? 
C3 Yb1 C1 50.9(4) . . ? 
C4 Yb1 C1 50.6(5) . . ? 
C6 Yb1 C1 153.3(6) . . ? 
C11 N1 C18' 118.9(7) . . ? 
C11 N1 C18 132.1(7) . . ? 
C18' N1 C18 18.92(16) . . ? 
C11 N1 Yb1 94.5(5) . . ? 
C18' N1 Yb1 135.4(5) . . ? 
C18 N1 Yb1 131.6(5) . . ? 
C11 N2 C25 122.2(8) . . ? 
C11 N2 Yb1 94.3(5) . . ? 
C25 N2 Yb1 143.3(6) . . ? 
C11 N3 C12 126.0(9) . . ? 
C2 C1 C5 108.8(13) . . ? 
C2 C1 Yb1 74.2(7) . . ? 
C5 C1 Yb1 73.5(7) . . ? 
C1 C2 C3 107.9(13) . . ? 
C1 C2 Yb1 75.4(7) . . ? 
C3 C2 Yb1 74.5(7) . . ? 
C4 C3 C2 107.1(13) . . ? 
C4 C3 Yb1 74.6(7) . . ? 
C2 C3 Yb1 74.3(7) . . ? 
C5 C4 C3 108.4(14) . . ? 
C5 C4 Yb1 73.9(7) . . ? 
C3 C4 Yb1 74.4(7) . . ? 
C1 C5 C4 107.8(13) . . ? 
C1 C5 Yb1 75.7(7) . . ? 
C4 C5 Yb1 75.3(7) . . ? 
C7 C6 C10 111.5(15) . . ? 
C7 C6 Yb1 74.2(9) . . ? 
C10 C6 Yb1 74.0(8) . . ? 
C6 C7 C8 110.0(16) . . ? 
C6 C7 Yb1 76.7(9) . . ? 
C8 C7 Yb1 75.2(8) . . ? 
C7 C8 C9 104.5(13) . . ? 
C7 C8 Yb1 74.0(8) . . ? 
C9 C8 Yb1 73.6(7) . . ? 
C10 C9 C8 106.3(12) . . ? 
C10 C9 Yb1 74.3(7) . . ? 
C8 C9 Yb1 73.7(8) . . ? 
C6 C10 C9 107.7(14) . . ? 
C6 C10 Yb1 76.1(8) . . ? 
C9 C10 Yb1 74.9(8) . . ? 
N1 C11 N2 112.6(8) . . ? 
N1 C11 N3 124.4(8) . . ? 
N2 C11 N3 123.0(8) . . ? 
N1 C11 Yb1 56.3(4) . . ? 
N2 C11 Yb1 56.3(4) . . ? 
N3 C11 Yb1 178.8(7) . . ? 
N3 C12 C13 112.9(9) . . ? 
N3 C12 C17 108.5(9) . . ? 
C13 C12 C17 111.8(10) . . ? 
C12 C13 C14 111.7(11) . . ? 
C13 C14 C15 110.5(12) . . ? 
C16 C15 C14 112.9(12) . . ? 
C15 C16 C17 111.9(13) . . ? 
C16 C17 C12 110.1(12) . . ? 
C19 C18 C23 120.0 . . ? 
C19 C18 N1 114.6(6) . . ? 
C23 C18 N1 125.4(6) . . ? 
C18 C19 C20 120.0 . . ? 
C19 C20 C21 120.0 . . ? 
C22 C21 C20 120.0 . . ? 
C22 C21 C22 103.3(8) . 3_666 ? 
C20 C21 C22 136.3(8) . 3_666 ? 
C22 C21 C21 57.4(6) . 3_666 ? 
C20 C21 C21 174.0(7) . 3_666 ? 
C22 C21 C21 45.9(4) 3_666 3_666 ? 
C23 C22 C21 120.0 . . ? 
C23 C22 C24 128.4(6) . 3_666 ? 
C21 C22 C24 111.6(6) . 3_666 ? 
C23 C22 C21 162.3(7) . 3_666 ? 
C21 C22 C21 76.7(7) . 3_666 ? 
C24 C22 C21 35.2(6) 3_666 3_666 ? 
C22 C23 C18 120.0 . . ? 
N1 C18' C19' 117.2(6) . . ? 
N1 C18' C23' 122.8(6) . . ? 
C19' C18' C23' 120.0 . . ? 
C20' C19' C18' 120.0 . . ? 
C21' C20' C19' 120.0 . . ? 
C21' C20' C24 108.5(6) . . ? 
C19' C20' C24 131.4(6) . . ? 
C21' C20' C21' 75.0(6) . 3_666 ? 
C19' C20' C21' 164.4(6) . 3_666 ? 
C24 C20' C21' 34.4(6) . 3_666 ? 
C24 C21' C20' 152.3(8) 3_666 . ? 
C24 C21' C22' 85.3(8) 3_666 . ? 
C20' C21' C22' 120.0 . . ? 
C24 C21' C20' 49.7(7) 3_666 3_666 ? 
C20' C21' C20' 105.0(7) . 3_666 ? 
C22' C21' C20' 134.7(7) . 3_666 ? 
C23' C22' C21' 120.0 . . ? 
C23' C22' C24 158.7(5) . 3_666 ? 
C21' C22' C24 40.8(5) . 3_666 ? 
C22' C23' C18' 120.0 . . ? 
C26 C25 N2 111.6(12) . . ? 
C26 C25 C30 106.8(12) . . ? 
N2 C25 C30 108.7(9) . . ? 
C25 C26 C27 111.6(15) . . ? 
C28 C27 C26 114(2) . . ? 
C29 C28 C27 111.7(16) . . ? 
C28 C29 C30 112.5(12) . . ? 
C25 C30 C29 111.7(11) . . ? 
C21' C24 C22 10.5(2) 3_666 3_666 ? 
C21' C24 C20' 95.9(10) 3_666 . ? 
C22 C24 C20' 101.0(9) 3_666 . ? 
C21' C24 C22' 53.9(6) 3_666 3_666 ? 
C22 C24 C22' 50.1(5) 3_666 3_666 ? 
C20' C24 C22' 149.4(10) . 3_666 ? 
  
_diffrn_measured_fraction_theta_max    0.999 
_diffrn_reflns_theta_full              25.01 
_diffrn_measured_fraction_theta_full   0.999 
_refine_diff_density_max    1.028 
_refine_diff_density_min   -1.264 
_refine_diff_density_rms    0.126 
  
#================END 
  
